# Supplementary material
Source: publisher figshare collection journal article supplement (https://geolsoc.figshare.com/ndownloader/files/22475885)
Supplement: Supplementary file 1 [file 22475885]

## Sheet: alphaMELTS setup
ALPHAMELTS_VERSION MELTS						Title: ATUD_gabbro_AT11
!ALPHAMELTS_OLD_GARNET true						Initial Composition: SiO2 47.21
!ALPHAMELTS_OLD_SPINEL true						Initial Composition: TiO2 0.33
!ALPHAMELTS_OLD_BIOTITE true						Initial Composition: Al2O3 15.79
!ALPHAMELTS_2_AMPH true						Initial Composition: Fe2O3 6.89
ALPHAMELTS_MODE isobaric						Initial Composition: FeO 0.0001
!ALPHAMELTS_PTPATH_FILE filename						Initial Composition: MnO 0.11
ALPHAMELTS_DELTAP +1000						Initial Composition: MgO 14.83
ALPHAMELTS_DELTAT -1						Initial Composition: CaO 13.57
ALPHAMELTS_MAXP +40000						Initial Composition: Na2O 1.07
ALPHAMELTS_MINP 0.5						Initial Composition: K2O 0.1
ALPHAMELTS_MAXT +2000						Initial Composition: P2O5 0.01
ALPHAMELTS_MINT 900						Initial Composition: H2O 1.0
!ALPHAMELTS_ALTERNATIVE_FO2 true						Initial Temperature: 1322.00
!ALPHAMELTS_LIQUID_FO2 true						Final Temperature: 600.00
!ALPHAMELTS_IMPOSE_FO2 true						Increment Temperature: -1.00
!ALPHAMELTS_FO2_PRESSURE_TERM true						Initial Pressure: 2000.00
!ALPHAMELTS_METASTABLE_ISOGRAD true						Final Pressure: 2000.00
!ALPHAMELTS_CONTINUOUS_MELTING true						Increment Pressure: 0.00
ALPHAMELTS_MINF 0.005						dp/dt: 0.00
!ALPHAMELTS_MINPHI 0.002						log fo2 Path: NNO
!ALPHAMELTS_CONTINUOUS_RATIO float						Mode: Fractionate Solids
!ALPHAMELTS_CONTINUOUS_VOLUME true						Initial Trace: Ba 24.5
ALPHAMELTS_FRACTIONATE_SOLIDS true						Initial Trace: Co 58.2
ALPHAMELTS_MASSIN 0.00001						Initial Trace: Cs 0.17
!ALPHAMELTS_FRACTIONATE_WATER true						Initial Trace: Hf 0.6
!ALPHAMELTS_MINW float						Initial Trace: Nb 0.464
!ALPHAMELTS_FRACTIONATE_TARGET true						Initial Trace: Ni 154.5
!ALPHAMELTS_MGO_TARGET 8.0						Initial Trace: Pb 0.5
!ALPHAMELTS_MGNUMBER_TARGET float						Initial Trace: Rb 1.4
!ALPHAMELTS_ASSIMILATE true						Initial Trace: Sc 32.5
!ALPHAMELTS_FLUX_MELTING true						Initial Trace: Sr 294
!ALPHAMELTS_DRY_ITER_PATIENCE 100						Initial Trace: Ta 0.04
ALPHAMELTS_DO_TRACE true						Initial Trace: Th 0.16
!ALPHAMELTS_DO_TRACE_H2O true						Initial Trace: U 0.05
!ALPHAMELTS_HK_OL_TRACE_H2O true						Initial Trace: V 123
!ALPHAMELTS_HK_PXGT_TRACE_H2O true						Initial Trace: Y 6.9
!ALPHAMELTS_2X_OPX_TRACE_H2O true						Initial Trace: Zr 22
ALPHAMELTS_TRACE_DEFAULT_DPTX true						Initial Trace: La 1.6
!ALPHAMELTS_TRACE_NORMALIZATION integer						Initial Trace: Ce 4.1
!ALPHAMELTS_TRACE_INPUT_FILE trace_data.txt						Initial Trace: Pr 0.63
!ALPHAMELTS_TRACE_USELIQFEMG true						Initial Trace: Nd 3.1
!ALPHAMELTS_MULTIPLE_LIQUIDS true						Initial Trace: Sm 1.05
!ALPHAMELTS_FRACTIONATE_SECOND_LIQUID true						Initial Trace: Eu 0.47
!ALPHAMELTS_FOCUS true						Initial Trace: Gd 1.24
!ALPHAMELTS_FOCUS_FACTOR float						Initial Trace: Tb 0.22
!ALPHAMELTS_V20_BIN_FILE true						Initial Trace: Dy 1.3
ALPHAMELTS_CELSIUS_OUTPUT true						Initial Trace: Ho 0.27
ALPHAMELTS_SAVE_ALL true						Initial Trace: Er 0.73
ALPHAMELTS_SKIP_FAILURE true						Initial Trace: Tm 0.12
!ALPHAMELTS_INTEGRATE_FILE filename						Initial Trace: Yb 0.7
						Initial Trace: Lu 0.09

## Sheet: MELTS output
Liquid	Composition:																																																Phase masses
Index	Pressure	Temperature	mass	SiO2	TiO2	Al2O3	Fe2O3	FeO	MnO	MgO	CaO	Na2O	K2O	P2O5	H2O	Fe2O3*		Ba	Co	Cs	Hf	Nb	Ni	Pb	Rb	Sc	Sr	Ta	Th	U	V	Y	Zr	La	Ce	Pr	Nd	Sm	Eu	Gd	Tb	Dy	Ho	Er	Tm	Yb	Lu		liquid_0
1	2000	1321	100.349	47.0458	0.328852	15.7351	1.28543	5.02159	0.109617	14.7784	13.5228	1.06628	0.0996522	0.00996522	0.996522	6.86497		24	58.2	0.17	0.6	0.464	154.5	0.5	1.4	32.5	294	0.04	0.16	0.05	123	6.9	22	1.6	4.1	0.63	3.1	1.05	0.47	1.24	0.22	1.3	0.27	0.73	0.12	0.7	0.09		100.349
2	2000	1320	100.199	47.0545	0.329345	15.7587	1.28583	5.01963	0.109627	14.7243	13.5424	1.06788	0.0998016	0.00998016	0.998016	6.8632		24.5367	58.2	0.170255	0.600899	0.464691	152.584	0.500749	1.4021	32.5409	294.44	0.0400596	0.16024	0.0500749	123.173	6.91028	22.0326	1.6024	4.10614	0.630943	3.10464	1.05157	0.470703	1.24185	0.220329	1.30194	0.270404	0.731092	0.120179	0.701047	0.0901346		100.199
3	2000	1319	100.078	47.0616	0.329743	15.7777	1.28619	5.018	0.109635	14.6806	13.5582	1.06917	0.0999223	0.00999223	0.999223	6.86175		24.5663	58.2	0.17046	0.601624	0.46525	151.052	0.501354	1.40379	32.5739	294.796	0.0401078	0.160433	0.0501354	123.313	6.91859	22.059	1.60433	4.11109	0.631704	3.10838	1.05284	0.47127	1.24335	0.220595	1.30351	0.27073	0.731973	0.120324	0.701892	0.0902433		100.078
4	2000	1318	99.9572	47.0686	0.330141	15.7968	1.28654	5.01635	0.109642	14.637	13.574	1.07046	0.100043	0.0100043	1.00043	6.86026		24.5959	58.2	0.170666	0.602349	0.465808	149.541	0.501958	1.40548	32.6069	295.151	0.0401558	0.160626	0.0501958	123.453	6.92688	22.0853	1.60626	4.11605	0.632465	3.11213	1.05411	0.471837	1.24485	0.22086	1.30508	0.271056	0.732854	0.120469	0.702737	0.0903519		99.9572
5	2000	1317	99.8372	47.0756	0.330538	15.8158	1.28688	5.01468	0.109649	14.5935	13.5898	1.07175	0.100163	0.0100163	1.00163	6.85875		24.6254	58.2	0.170871	0.603073	0.466365	148.048	0.502561	1.40717	32.6398	295.506	0.0402038	0.160819	0.0502561	123.592	6.93516	22.1116	1.60819	4.12099	0.633224	3.11586	1.05537	0.472403	1.24634	0.221125	1.30665	0.271381	0.733733	0.120614	0.70358	0.0904603		99.8372
6	2000	1316	99.7175	47.0827	0.330935	15.8347	1.28723	5.01299	0.109656	14.5501	13.6056	1.07303	0.100283	0.0100283	1.00283	6.85722		24.6549	58.2	0.171075	0.603796	0.466921	146.575	0.503163	1.40886	32.6726	295.86	0.0402518	0.161012	0.0503163	123.731	6.94343	22.1378	1.61012	4.12592	0.633982	3.11959	1.05663	0.472969	1.24783	0.22139	1.30821	0.271705	0.734611	0.120758	0.704422	0.0905685		99.7175
7	2000	1315	99.5984	47.0897	0.331331	15.8537	1.28757	5.01128	0.109662	14.5067	13.6213	1.07431	0.100403	0.0100403	1.00403	6.85566		24.6844	58.2	0.17128	0.604517	0.467476	145.12	0.503764	1.41054	32.7054	296.213	0.0402996	0.161205	0.0503764	123.87	6.95169	22.164	1.61204	4.13085	0.634739	3.12332	1.0579	0.473533	1.24932	0.221654	1.30977	0.27203	0.735488	0.120902	0.705262	0.0906766		99.5984
8	2000	1314	99.4797	47.0967	0.331726	15.8726	1.28791	5.00955	0.109668	14.4635	13.637	1.0756	0.100523	0.0100523	1.00523	6.85408		24.7138	58.2	0.171484	0.605238	0.46803	143.683	0.504364	1.41222	32.7381	296.566	0.0403474	0.161397	0.0504365	124.009	6.95993	22.1901	1.61396	4.13577	0.635495	3.12704	1.05915	0.474096	1.25081	0.221918	1.31133	0.272353	0.736363	0.121046	0.706102	0.0907845		99.4797
9	2000	1313	99.3615	47.1037	0.332121	15.8915	1.28824	5.00781	0.109674	14.4203	13.6527	1.07688	0.100643	0.0100643	1.00643	6.85247		24.7432	58.2	0.171688	0.605957	0.468584	142.264	0.504964	1.4139	32.7708	296.919	0.0403952	0.161589	0.0504964	124.148	6.96816	22.2162	1.61588	4.14069	0.63625	3.13075	1.06041	0.474659	1.25229	0.222181	1.31289	0.272676	0.737237	0.12119	0.70694	0.0908923		99.3615
10	2000	1312	99.2437	47.1107	0.332515	15.9103	1.28858	5.00604	0.10968	14.3772	13.6683	1.07815	0.100762	0.0100762	1.00762	6.85085		24.7725	58.2	0.171891	0.606676	0.469137	140.863	0.505562	1.41557	32.8034	297.27	0.0404428	0.16178	0.0505563	124.286	6.97638	22.2423	1.61779	4.14559	0.637004	3.13446	1.06167	0.475221	1.25378	0.222444	1.31444	0.272999	0.73811	0.121333	0.707776	0.0909998		99.2437
11	2000	1311	99.1264	47.1177	0.332908	15.9292	1.28891	5.00426	0.109685	14.3342	13.684	1.07943	0.100881	0.0100881	1.00881	6.8492		24.8018	58.2	0.172095	0.607393	0.469688	139.479	0.50616	1.41725	32.836	297.622	0.0404904	0.161971	0.0506161	124.424	6.98459	22.2683	1.61971	4.15049	0.637756	3.13816	1.06292	0.475782	1.25526	0.222707	1.31599	0.273321	0.738981	0.121476	0.708612	0.0911073		99.1264
12	2000	1310	99.0096	47.1247	0.333301	15.948	1.28923	5.00245	0.10969	14.2913	13.6996	1.0807	0.101	0.0101	1.01	6.84751		24.831	58.2	0.172297	0.608109	0.470239	138.113	0.506757	1.41892	32.8685	297.973	0.0405379	0.162162	0.0506757	124.562	6.99278	22.2943	1.62162	4.15538	0.638508	3.14185	1.06417	0.476342	1.25673	0.222969	1.31754	0.273643	0.739851	0.121619	0.709446	0.0912145		99.0096
13	2000	1309	98.8932	47.1317	0.333693	15.9667	1.28955	5.00063	0.109695	14.2485	13.7151	1.08198	0.101119	0.0101119	1.01119	6.84581		24.8602	58.2	0.1725	0.608824	0.47079	136.764	0.507353	1.42059	32.901	298.323	0.0405853	0.162353	0.0507353	124.7	7.00097	22.3203	1.62352	4.16027	0.639258	3.14554	1.06542	0.476901	1.25821	0.223231	1.31909	0.273964	0.74072	0.121762	0.710279	0.0913216		98.8932
14	2000	1308	98.7772	47.1387	0.334085	15.9855	1.28987	4.99879	0.109699	14.2057	13.7307	1.08325	0.101238	0.0101238	1.01238	6.84408		24.8894	58.2	0.172702	0.609538	0.471339	135.431	0.507948	1.42225	32.9334	298.673	0.0406327	0.162543	0.0507948	124.837	7.00913	22.3462	1.62542	4.16514	0.640007	3.14923	1.06667	0.477459	1.25968	0.223492	1.32063	0.274285	0.741587	0.121905	0.711111	0.0914285		98.7772
15	2000	1307	98.6617	47.1457	0.334476	16.0042	1.29019	4.99693	0.109703	14.1631	13.7462	1.08451	0.101356	0.0101356	1.01356	6.84233		24.9184	58.2	0.172904	0.610251	0.471887	134.115	0.508542	1.42391	32.9657	299.022	0.0406799	0.162734	0.0508542	124.974	7.01729	22.3721	1.62732	4.17001	0.640755	3.15291	1.06792	0.478017	1.26115	0.223753	1.32217	0.274605	0.742453	0.122047	0.711941	0.0915353		98.6617
16	2000	1306	98.5466	47.1526	0.334867	16.0229	1.2905	4.99505	0.109707	14.1205	13.7617	1.08578	0.101475	0.0101475	1.01475	6.84056		24.9475	58.2	0.173106	0.610963	0.472435	132.816	0.509135	1.42557	32.998	299.371	0.0407272	0.162923	0.0509135	125.111	7.02543	22.3979	1.62922	4.17487	0.641501	3.15658	1.06916	0.478574	1.26262	0.224014	1.32371	0.274925	0.743318	0.122189	0.71277	0.0916419		98.5466
17	2000	1305	98.432	47.1596	0.335257	16.0415	1.29081	4.99316	0.109711	14.078	13.7772	1.08704	0.101593	0.0101593	1.01593	6.83877		24.9765	58.2	0.173307	0.611673	0.472982	131.532	0.509727	1.42723	33.0303	299.719	0.0407743	0.163113	0.0509728	125.248	7.03356	22.4237	1.63112	4.17973	0.642247	3.16025	1.0704	0.479129	1.26409	0.224274	1.32525	0.275244	0.744181	0.122331	0.713598	0.0917483		98.432
18	2000	1304	98.3179	47.1665	0.335646	16.0602	1.29112	4.99124	0.109714	14.0356	13.7927	1.08831	0.101711	0.0101711	1.01711	6.83694		25.0055	58.2	0.173508	0.612383	0.473528	130.264	0.510318	1.42889	33.0624	300.066	0.0408214	0.163302	0.0510319	125.385	7.04168	22.4494	1.63301	4.18457	0.642991	3.16391	1.07164	0.479684	1.26555	0.224533	1.32678	0.275563	0.745043	0.122473	0.714425	0.0918546		98.3179
19	2000	1303	98.2041	47.1735	0.336035	16.0788	1.29142	4.98931	0.109717	13.9933	13.8081	1.08957	0.101829	0.0101829	1.01829	6.8351		25.0344	58.2	0.173709	0.613091	0.474073	129.012	0.510908	1.43054	33.0946	300.414	0.0408683	0.163491	0.0510909	125.521	7.04979	22.4752	1.6349	4.18941	0.643735	3.16757	1.07288	0.480238	1.26701	0.224793	1.32832	0.275882	0.745904	0.122614	0.71525	0.0919607		98.2041
20	2000	1302	98.0908	47.1804	0.336423	16.0973	1.29173	4.98735	0.109719	13.9511	13.8235	1.09083	0.101946	0.0101946	1.01946	6.83323		25.0633	58.2	0.173909	0.613799	0.474617	127.775	0.511498	1.43219	33.1266	300.76	0.0409153	0.16368	0.0511499	125.657	7.05788	22.5008	1.63678	4.19424	0.644477	3.17122	1.07412	0.480791	1.26847	0.225052	1.32985	0.276199	0.746763	0.122756	0.716074	0.0920667		98.0908
21	2000	1301	97.978	47.1874	0.33681	16.1159	1.29202	4.98538	0.109722	13.9089	13.8389	1.09208	0.102064	0.0102064	1.02064	6.83133		25.0921	58.2	0.17411	0.614505	0.47516	126.553	0.512086	1.43384	33.1586	301.106	0.0409621	0.163868	0.0512087	125.793	7.06596	22.5265	1.63866	4.19907	0.645218	3.17487	1.07535	0.481344	1.26993	0.22531	1.33137	0.276517	0.747621	0.122897	0.716897	0.0921724		97.978
22	2000	1300	97.8656	47.1943	0.337197	16.1344	1.29232	4.98339	0.109724	13.8669	13.8543	1.09334	0.102181	0.0102181	1.02181	6.82942		25.1209	58.2	0.174309	0.61521	0.475703	125.346	0.512674	1.43548	33.1906	301.452	0.0410089	0.164056	0.0512675	125.929	7.07403	22.5521	1.64054	4.20388	0.645958	3.17851	1.07658	0.481895	1.27139	0.225569	1.3329	0.276833	0.748478	0.123037	0.717718	0.0922781		97.8656
23	2000	1299	97.7536	47.2012	0.337584	16.1529	1.29261	4.98138	0.109726	13.8249	13.8696	1.09459	0.102298	0.0102298	1.02298	6.82748		25.1496	58.2	0.174509	0.615914	0.476245	124.154	0.513261	1.43713	33.2225	301.796	0.0410556	0.164244	0.0513262	126.064	7.08209	22.5776	1.64242	4.20869	0.646696	3.18214	1.07781	0.482446	1.27284	0.225826	1.33442	0.27715	0.749333	0.123178	0.718538	0.0923835		97.7536
24	2000	1298	97.642	47.2082	0.337969	16.1713	1.2929	4.97936	0.109727	13.783	13.8849	1.09584	0.102415	0.0102415	1.02415	6.82552		25.1783	58.2	0.174708	0.616617	0.476785	122.976	0.513846	1.43877	33.2544	302.141	0.0411022	0.164431	0.0513848	126.199	7.09013	22.6031	1.64429	4.21349	0.647434	3.18577	1.07904	0.482996	1.27429	0.226084	1.33594	0.277466	0.750187	0.123318	0.719357	0.0924888		97.642
25	2000	1297	97.5309	47.2151	0.338354	16.1897	1.29319	4.97731	0.109728	13.7412	13.9002	1.09709	0.102532	0.0102532	1.02532	6.82353		25.207	58.2	0.174907	0.617319	0.477326	121.813	0.514431	1.4404	33.2861	302.485	0.0411488	0.164618	0.0514432	126.334	7.09816	22.6286	1.64617	4.21829	0.64817	3.18939	1.08027	0.483545	1.27574	0.226341	1.33746	0.277781	0.75104	0.123459	0.720175	0.0925939		97.5309
26	2000	1296	97.4202	47.222	0.338739	16.2081	1.29347	4.97525	0.109729	13.6995	13.9155	1.09834	0.102648	0.0102648	1.02648	6.82153		25.2356	58.2	0.175105	0.61802	0.477865	120.664	0.515015	1.44204	33.3179	302.828	0.0411952	0.164805	0.0515016	126.469	7.10618	22.654	1.64803	4.22307	0.648906	3.19301	1.08149	0.484093	1.27718	0.226597	1.33898	0.278096	0.751891	0.123599	0.720991	0.0926989		97.4202
27	2000	1295	97.3099	47.2289	0.339123	16.2265	1.29375	4.97316	0.10973	13.6579	13.9307	1.09958	0.102765	0.0102764	1.02765	6.81948		25.2642	58.2	0.175304	0.61872	0.478403	119.528	0.515598	1.44367	33.3496	303.171	0.0412416	0.164992	0.05156	126.604	7.11418	22.6794	1.6499	4.22785	0.64964	3.19662	1.08272	0.48464	1.27863	0.226853	1.34049	0.27841	0.752741	0.123738	0.721806	0.0928037		97.3099
28	2000	1294	97.2	47.2358	0.339506	16.2449	1.29402	4.97106	0.10973	13.6163	13.9459	1.10082	0.102881	0.0102881	1.02881	6.81742		25.2927	58.2	0.175502	0.619418	0.47894	118.406	0.51618	1.4453	33.3812	303.513	0.041288	0.165178	0.0516182	126.738	7.12218	22.7048	1.65176	4.23262	0.650373	3.20023	1.08394	0.485186	1.28007	0.227109	1.342	0.278724	0.75359	0.123878	0.72262	0.0929083		97.2
29	2000	1293	97.0906	47.2427	0.339889	16.2632	1.2943	4.96895	0.10973	13.5749	13.9611	1.10206	0.102997	0.0102997	1.02997	6.81536		25.3211	58.2	0.175699	0.620116	0.479477	117.298	0.516761	1.44693	33.4128	303.855	0.0413342	0.165364	0.0516763	126.872	7.13016	22.7301	1.65362	4.23739	0.651104	3.20383	1.08516	0.485732	1.28151	0.227365	1.34351	0.279037	0.754437	0.124017	0.723433	0.0930128		97.0906
30	2000	1292	96.9815	47.2496	0.340271	16.2815	1.29457	4.96681	0.10973	13.5335	13.9763	1.1033	0.103112	0.0103112	1.03112	6.81325		25.3496	58.2	0.175896	0.620812	0.480013	116.203	0.517342	1.44855	33.4443	304.196	0.0413804	0.16555	0.0517343	127.006	7.13812	22.7553	1.65548	4.24214	0.651835	3.20742	1.08637	0.486276	1.28295	0.227619	1.34502	0.27935	0.755283	0.124156	0.724244	0.0931171		96.9815
31	2000	1291	96.8729	47.2565	0.340653	16.2997	1.29484	4.96465	0.10973	13.4922	13.9914	1.10454	0.103228	0.0103228	1.03228	6.81112		25.378	58.2	0.176093	0.621508	0.480548	115.121	0.517921	1.45017	33.4757	304.537	0.0414265	0.165735	0.0517923	127.14	7.14608	22.7806	1.65733	4.24689	0.652564	3.21101	1.08759	0.48682	1.28438	0.227874	1.34652	0.279663	0.756128	0.124295	0.725054	0.0932212		96.8729
32	2000	1290	96.7647	47.2633	0.341033	16.3179	1.2951	4.96248	0.109729	13.451	14.0065	1.10578	0.103343	0.0103343	1.03343	6.80897		25.4063	58.2	0.17629	0.622202	0.481082	114.052	0.5185	1.45179	33.5071	304.877	0.0414726	0.16592	0.0518501	127.273	7.15402	22.8058	1.65918	4.25163	0.653293	3.21459	1.0888	0.487363	1.28581	0.228128	1.34802	0.279975	0.756971	0.124434	0.725862	0.0933252		96.7647
33	2000	1289	96.6569	47.2702	0.341414	16.3361	1.29536	4.96029	0.109728	13.4099	14.0216	1.10701	0.103459	0.0103459	1.03459	6.80679		25.4346	58.2	0.176487	0.622895	0.481615	112.996	0.519077	1.45341	33.5385	305.216	0.0415185	0.166105	0.0519079	127.407	7.16195	22.8309	1.66103	4.25637	0.65402	3.21817	1.09001	0.487905	1.28724	0.228382	1.34952	0.280286	0.757813	0.124572	0.72667	0.093429		96.6569
34	2000	1288	96.5495	47.2771	0.341793	16.3543	1.29562	4.95808	0.109727	13.3689	14.0367	1.10824	0.103574	0.0103574	1.03574	6.8046		25.4628	58.2	0.176683	0.623587	0.482147	111.953	0.519654	1.45503	33.5698	305.555	0.0415644	0.16629	0.0519656	127.54	7.16987	22.856	1.66287	4.26109	0.654746	3.22174	1.09122	0.488446	1.28867	0.228635	1.35102	0.280597	0.758653	0.12471	0.727476	0.0935326		96.5495
35	2000	1287	96.4426	47.2839	0.342173	16.3724	1.29588	4.95585	0.109725	13.3279	14.0517	1.10947	0.103689	0.0103689	1.03689	6.80238		25.491	58.2	0.176878	0.624278	0.482679	110.921	0.520229	1.45664	33.601	305.894	0.0416103	0.166474	0.0520231	127.673	7.17777	22.8811	1.66471	4.26581	0.655471	3.22531	1.09243	0.488987	1.2901	0.228888	1.35251	0.280907	0.759493	0.124848	0.728281	0.0936361		96.4426
36	2000	1286	96.336	47.2908	0.342551	16.3905	1.29613	4.95361	0.109723	13.2871	14.0667	1.1107	0.103803	0.0103803	1.03803	6.80014		25.5192	58.2	0.177074	0.624968	0.48321	109.902	0.520804	1.45825	33.6322	306.232	0.041656	0.166658	0.0520806	127.805	7.18566	22.9061	1.66655	4.27052	0.656195	3.22887	1.09364	0.489526	1.29152	0.229141	1.354	0.281217	0.760331	0.124986	0.729084	0.0937394		96.336
37	2000	1285	96.2298	47.2976	0.342929	16.4086	1.29638	4.95135	0.109721	13.2463	14.0817	1.11192	0.103918	0.0103918	1.03918	6.79788		25.5473	58.2	0.177269	0.625656	0.48374	108.895	0.521378	1.45985	33.6633	306.569	0.0417017	0.166842	0.052138	127.938	7.19354	22.9311	1.66839	4.27523	0.656917	3.23242	1.09484	0.490065	1.29294	0.229393	1.35549	0.281526	0.761167	0.125123	0.729887	0.0938426		96.2298
38	2000	1284	96.1241	47.3044	0.343306	16.4267	1.29663	4.94906	0.109719	13.2056	14.0967	1.11314	0.104032	0.0104032	1.04032	6.79559		25.5754	58.2	0.177464	0.626344	0.484269	107.9	0.521951	1.46146	33.6944	306.906	0.0417473	0.167025	0.0521953	128.07	7.20141	22.9561	1.67022	4.27993	0.657639	3.23597	1.09604	0.490602	1.29436	0.229645	1.35698	0.281835	0.762003	0.125261	0.730688	0.0939455		96.1241
39	2000	1283	96.0187	47.3113	0.343683	16.4447	1.29687	4.94677	0.109716	13.165	14.1116	1.11437	0.104146	0.0104146	1.04146	6.79328		25.6034	58.2	0.177658	0.627031	0.484797	106.917	0.522523	1.46306	33.7254	307.242	0.0417928	0.167208	0.0522525	128.202	7.20926	22.981	1.67205	4.28461	0.658359	3.23951	1.09724	0.491139	1.29578	0.229896	1.35846	0.282144	0.762837	0.125398	0.731487	0.0940484		96.0187
40	2000	1282	95.9138	47.3181	0.344059	16.4627	1.29711	4.94445	0.109713	13.1245	14.1265	1.11559	0.10426	0.010426	1.0426	6.79094		25.6314	58.2	0.177852	0.627716	0.485324	105.945	0.523094	1.46466	33.7564	307.578	0.0418383	0.167391	0.0523096	128.333	7.2171	23.0059	1.67388	4.2893	0.659078	3.24305	1.09844	0.491675	1.29719	0.230147	1.35995	0.282452	0.763669	0.125535	0.732286	0.094151		95.9138
41	2000	1281	95.8092	47.3249	0.344435	16.4807	1.29735	4.94211	0.10971	13.084	14.1414	1.1168	0.104374	0.0104374	1.04374	6.78858		25.6593	58.2	0.178046	0.6284	0.48585	104.985	0.523664	1.46626	33.7873	307.913	0.0418837	0.167573	0.0523667	128.465	7.22493	23.0307	1.6757	4.29397	0.659796	3.24658	1.09963	0.49221	1.2986	0.230397	1.36143	0.282759	0.764501	0.125671	0.733083	0.0942535		95.8092
42	2000	1280	95.705	47.3317	0.344809	16.4986	1.29758	4.93976	0.109706	13.0437	14.1563	1.11802	0.104488	0.0104488	1.04488	6.7862		25.6872	58.2	0.17824	0.629084	0.486376	104.036	0.524234	1.46785	33.8181	308.248	0.041929	0.167756	0.0524236	128.596	7.23275	23.0555	1.67752	4.29864	0.660513	3.25011	1.10083	0.492745	1.30001	0.230648	1.3629	0.283066	0.765331	0.125808	0.733879	0.0943558		95.705
43	2000	1279	95.6013	47.3385	0.345184	16.5165	1.29781	4.93739	0.109703	13.0034	14.1711	1.11923	0.104601	0.0104601	1.04601	6.7838		25.7151	58.2	0.178433	0.629766	0.486901	103.098	0.524802	1.46944	33.8489	308.582	0.0419742	0.167937	0.0524804	128.727	7.24055	23.0802	1.67934	4.30329	0.661228	3.25363	1.10202	0.493278	1.30142	0.230897	1.36438	0.283373	0.766159	0.125944	0.734673	0.094458		95.6013
44	2000	1278	95.4979	47.3453	0.345557	16.5344	1.29804	4.935	0.109698	12.9633	14.1859	1.12044	0.104714	0.0104714	1.04714	6.78137		25.7429	58.2	0.178626	0.630447	0.487425	102.171	0.52537	1.47103	33.8797	308.916	0.0420194	0.168119	0.0525372	128.858	7.24834	23.1049	1.68116	4.30795	0.661943	3.25715	1.10321	0.493811	1.30283	0.231147	1.36585	0.283679	0.766987	0.12608	0.735466	0.09456		95.4979
45	2000	1277	95.3949	47.3521	0.345931	16.5523	1.29827	4.9326	0.109694	12.9232	14.2007	1.12165	0.104827	0.0104827	1.04827	6.77894		25.7706	58.2	0.178819	0.631127	0.487948	101.254	0.525936	1.47262	33.9104	309.249	0.0420645	0.1683	0.0525939	128.989	7.25612	23.1296	1.68297	4.31259	0.662656	3.26066	1.1044	0.494342	1.30423	0.231396	1.36732	0.283984	0.767812	0.126216	0.736258	0.0946618		95.3949
46	2000	1276	95.2923	47.3589	0.346303	16.5701	1.29849	4.93018	0.10969	12.8832	14.2155	1.12286	0.10494	0.010494	1.0494	6.77647		25.7983	58.2	0.179011	0.631805	0.48847	100.349	0.526502	1.4742	33.941	309.582	0.0421095	0.168481	0.0526504	129.119	7.26389	23.1542	1.68478	4.31723	0.663368	3.26416	1.10559	0.494873	1.30563	0.231644	1.36879	0.284289	0.768637	0.126351	0.737049	0.0947635		95.2923
47	2000	1275	95.19	47.3657	0.346675	16.5879	1.29871	4.92774	0.109685	12.8432	14.2303	1.12407	0.105053	0.0105053	1.05053	6.77398		25.826	58.2	0.179203	0.632483	0.488991	99.4535	0.527067	1.47578	33.9716	309.914	0.0421544	0.168662	0.0527069	129.249	7.27164	23.1788	1.68659	4.32185	0.664079	3.26766	1.10677	0.495403	1.30703	0.231892	1.37026	0.284593	0.76946	0.126487	0.737839	0.094865		95.19
48	2000	1274	95.0882	47.3725	0.347046	16.6056	1.29893	4.92528	0.10968	12.8034	14.245	1.12527	0.105166	0.0105166	1.05166	6.77146		25.8536	58.2	0.179395	0.63316	0.489512	98.5687	0.52763	1.47736	34.0021	310.245	0.0421993	0.168843	0.0527633	129.379	7.27938	23.2034	1.68839	4.32648	0.664789	3.27115	1.10795	0.495932	1.30842	0.23214	1.37172	0.284897	0.770282	0.126622	0.738627	0.0949663		95.0882
49	2000	1273	94.9868	47.3792	0.347417	16.6234	1.29914	4.9228	0.109674	12.7636	14.2597	1.12647	0.105278	0.0105278	1.05278	6.76892		25.8812	58.2	0.179586	0.633835	0.490032	97.694	0.528193	1.47893	34.0326	310.576	0.0422441	0.169023	0.0528196	129.509	7.28711	23.2279	1.69019	4.33109	0.665498	3.27464	1.10913	0.496461	1.30982	0.232387	1.37318	0.285201	0.771103	0.126757	0.739414	0.0950675		94.9868
50	2000	1272	94.8857	47.386	0.347787	16.6411	1.29935	4.92031	0.109669	12.724	14.2743	1.12767	0.10539	0.010539	1.0539	6.76636		25.9087	58.2	0.179777	0.63451	0.49055	96.8295	0.528755	1.48051	34.063	310.907	0.0422888	0.169203	0.0528758	129.639	7.29482	23.2523	1.69199	4.3357	0.666205	3.27812	1.11031	0.496988	1.31121	0.232634	1.37464	0.285504	0.771922	0.126891	0.740199	0.0951685		94.8857
51	2000	1271	94.785	47.3927	0.348156	16.6588	1.29956	4.9178	0.109663	12.6844	14.289	1.12887	0.105502	0.0105502	1.05502	6.76378		25.9362	58.2	0.179968	0.635183	0.491068	95.9749	0.529316	1.48208	34.0933	311.236	0.0423335	0.169382	0.0529319	129.768	7.30252	23.2768	1.69378	4.34029	0.666912	3.28159	1.11149	0.497515	1.3126	0.232881	1.3761	0.285806	0.77274	0.127026	0.740984	0.0952693		94.785
52	2000	1270	94.6847	47.3995	0.348525	16.6764	1.29977	4.91527	0.109656	12.6449	14.3036	1.13007	0.105614	0.0105614	1.05614	6.76118		25.9636	58.2	0.180159	0.635855	0.491585	95.13	0.529876	1.48365	34.1236	311.566	0.0423781	0.169561	0.0529879	129.897	7.31021	23.3012	1.69558	4.34489	0.667617	3.28506	1.11266	0.49804	1.31399	0.233127	1.37755	0.286108	0.773557	0.12716	0.741767	0.09537		94.6847
53	2000	1269	94.5847	47.4062	0.348894	16.694	1.29997	4.91273	0.10965	12.6055	14.3182	1.13126	0.105725	0.0105725	1.05725	6.75856		25.991	58.2	0.180349	0.636527	0.492102	94.2949	0.530436	1.48521	34.1539	311.895	0.0424226	0.16974	0.0530438	130.026	7.31789	23.3255	1.69736	4.34947	0.668321	3.28853	1.11384	0.498565	1.31537	0.233372	1.379	0.28641	0.774372	0.127294	0.742548	0.0954705		94.5847
54	2000	1268	94.4851	47.413	0.349261	16.7116	1.30017	4.91016	0.109643	12.5662	14.3328	1.13245	0.105837	0.0105837	1.05837	6.7559		26.0184	58.2	0.180538	0.637197	0.492617	93.4693	0.530994	1.48678	34.1841	312.223	0.042467	0.169919	0.0530997	130.154	7.32556	23.3498	1.69915	4.35405	0.669024	3.29198	1.11501	0.499089	1.31675	0.233618	1.38045	0.286711	0.775186	0.127428	0.743329	0.0955709		94.4851
55	2000	1267	94.3859	47.4197	0.349628	16.7292	1.30036	4.90758	0.109636	12.5269	14.3473	1.13364	0.105948	0.0105948	1.05948	6.75323		26.0457	58.2	0.180728	0.637866	0.493132	92.653	0.531551	1.48834	34.2142	312.55	0.0425114	0.170097	0.0531554	130.283	7.33321	23.3741	1.70093	4.35861	0.669726	3.29544	1.11618	0.499612	1.31813	0.233863	1.3819	0.287011	0.775999	0.127561	0.744108	0.0956711		94.3859
56	2000	1266	94.2871	47.4264	0.349995	16.7467	1.30056	4.90499	0.109629	12.4878	14.3618	1.13483	0.106059	0.0106059	1.06059	6.75055		26.073	58.2	0.180917	0.638533	0.493645	91.8461	0.532108	1.48989	34.2443	312.878	0.0425556	0.170275	0.0532111	130.411	7.34085	23.3983	1.70271	4.36318	0.670427	3.29888	1.11734	0.500135	1.31951	0.234107	1.38334	0.287311	0.77681	0.127695	0.744886	0.0957711		94.2871
57	2000	1265	94.1887	47.4331	0.350361	16.7642	1.30075	4.90237	0.109621	12.4487	14.3763	1.13602	0.10617	0.010617	1.0617	6.74783		26.1002	58.2	0.181106	0.6392	0.494158	91.0483	0.532663	1.49145	34.2743	313.204	0.0425999	0.170453	0.0532666	130.539	7.34847	23.4225	1.70449	4.36773	0.671126	3.30232	1.11851	0.500656	1.32089	0.234351	1.38478	0.287611	0.77762	0.127828	0.745663	0.0958709		94.1887
58	2000	1264	94.0906	47.4399	0.350726	16.7817	1.30094	4.89974	0.109614	12.4097	14.3908	1.1372	0.106281	0.0106281	1.06281	6.7451		26.1273	58.2	0.181295	0.639866	0.49467	90.2596	0.533218	1.493	34.3043	313.53	0.042644	0.170631	0.0533221	130.667	7.35609	23.4467	1.70626	4.37228	0.671825	3.30576	1.11967	0.501177	1.32226	0.234595	1.38622	0.28791	0.778428	0.127961	0.746438	0.0959706		94.0906
59	2000	1263	93.9928	47.4466	0.351091	16.7992	1.30112	4.89709	0.109606	12.3708	14.4053	1.13838	0.106391	0.0106391	1.06391	6.74233		26.1545	58.2	0.181483	0.64053	0.495182	89.4798	0.533772	1.49455	34.3342	313.856	0.0426881	0.170808	0.0533775	130.794	7.36369	23.4708	1.70804	4.37681	0.672522	3.30919	1.12083	0.501696	1.32363	0.234838	1.38766	0.288209	0.779236	0.128094	0.747212	0.0960701		93.9928
60	2000	1262	93.8955	47.4533	0.351455	16.8166	1.3013	4.89443	0.109597	12.332	14.4197	1.13957	0.106501	0.0106501	1.06501	6.73956		26.1816	58.2	0.181671	0.641194	0.495692	88.7088	0.534325	1.4961	34.3641	314.181	0.0427321	0.170985	0.0534328	130.922	7.37128	23.4948	1.7098	4.38135	0.673218	3.31261	1.12199	0.502215	1.325	0.235081	1.3891	0.288507	0.780041	0.128226	0.747985	0.0961695		93.8955
61	2000	1261	93.7985	47.46	0.351818	16.834	1.30148	4.89174	0.109589	12.2932	14.4341	1.14074	0.106612	0.0106612	1.06612	6.73675		26.2086	58.2	0.181859	0.641856	0.496201	87.9464	0.534877	1.49765	34.3939	314.506	0.042776	0.171162	0.053488	131.049	7.37886	23.5189	1.71157	4.38587	0.673913	3.31603	1.12315	0.502733	1.32637	0.235323	1.39053	0.288804	0.780846	0.128358	0.748756	0.0962687		93.7985
62	2000	1260	93.7018	47.4666	0.352181	16.8513	1.30166	4.88904	0.10958	12.2546	14.4485	1.14192	0.106722	0.0106722	1.06722	6.73393		26.2356	58.2	0.182046	0.642517	0.49671	87.1926	0.535428	1.49919	34.4237	314.829	0.0428198	0.171338	0.0535431	131.176	7.38642	23.5428	1.71333	4.39039	0.674606	3.31945	1.12431	0.50325	1.32773	0.235566	1.39196	0.289101	0.781649	0.12849	0.749527	0.0963677		93.7018
63	2000	1259	93.6055	47.4733	0.352543	16.8687	1.30183	4.88633	0.109571	12.216	14.4628	1.14309	0.106831	0.0106831	1.06831	6.73109		26.2625	58.2	0.182233	0.643178	0.497218	86.4473	0.535978	1.50073	34.4534	315.153	0.0428636	0.171514	0.0535981	131.303	7.39397	23.5668	1.71509	4.39489	0.675299	3.32285	1.12546	0.503766	1.3291	0.235807	1.39339	0.289398	0.782451	0.128622	0.750296	0.0964666		93.6055
64	2000	1258	93.5096	47.48	0.352905	16.886	1.302	4.88359	0.109561	12.1775	14.4771	1.14427	0.106941	0.0106941	1.06941	6.72821		26.2894	58.2	0.18242	0.643837	0.497725	85.7103	0.536527	1.50227	34.483	315.476	0.0429073	0.17169	0.053653	131.429	7.40151	23.5907	1.71685	4.3994	0.67599	3.32625	1.12661	0.504282	1.33046	0.236048	1.39481	0.289694	0.783252	0.128754	0.751063	0.0965653		93.5096
65	2000	1257	93.414	47.4867	0.353266	16.9032	1.30217	4.88084	0.109552	12.1391	14.4914	1.14544	0.10705	0.010705	1.0705	6.72533		26.3163	58.2	0.182606	0.644495	0.498231	84.9815	0.537075	1.5038	34.5126	315.798	0.0429509	0.171865	0.0537079	131.555	7.40904	23.6146	1.7186	4.40389	0.676681	3.32965	1.12776	0.504796	1.33181	0.236289	1.39624	0.289989	0.784051	0.128885	0.75183	0.0966638		93.414
66	2000	1256	93.3188	47.4933	0.353626	16.9205	1.30234	4.87808	0.109542	12.1008	14.5057	1.14661	0.10716	0.010716	1.0716	6.72243		26.3431	58.2	0.182792	0.645152	0.498736	84.2609	0.537622	1.50533	34.5422	316.12	0.0429945	0.17204	0.0537626	131.681	7.41655	23.6384	1.72035	4.40838	0.67737	3.33304	1.12891	0.50531	1.33317	0.23653	1.39766	0.290284	0.784849	0.129016	0.752595	0.0967622		93.3188
67	2000	1255	93.2239	47.5	0.353986	16.9377	1.3025	4.87529	0.109532	12.0626	14.52	1.14777	0.107269	0.0107269	1.07269	6.71949		26.3699	58.2	0.182978	0.645807	0.499241	83.5482	0.538169	1.50686	34.5717	316.441	0.043038	0.172215	0.0538172	131.807	7.42405	23.6622	1.7221	4.41285	0.678058	3.33643	1.13005	0.505823	1.33452	0.23677	1.39907	0.290579	0.785645	0.129147	0.753359	0.0968604		93.2239
68	2000	1254	93.1294	47.5066	0.354346	16.9549	1.30266	4.87249	0.109521	12.0244	14.5342	1.14894	0.107377	0.0107377	1.07377	6.71654		26.3966	58.2	0.183164	0.646462	0.499744	82.8435	0.538714	1.50839	34.6011	316.762	0.0430814	0.17239	0.0538718	131.933	7.43154	23.6859	1.72385	4.41733	0.678745	3.3398	1.1312	0.506335	1.33587	0.23701	1.40049	0.290873	0.786441	0.129278	0.754121	0.0969584		93.1294
69	2000	1253	93.0353	47.5133	0.354704	16.9721	1.30281	4.86967	0.109511	11.9864	14.5484	1.1501	0.107486	0.0107486	1.07486	6.71355		26.4233	58.2	0.183349	0.647116	0.500247	82.1466	0.539259	1.50992	34.6305	317.082	0.0431247	0.172564	0.0539263	132.058	7.43902	23.7096	1.72559	4.42179	0.67943	3.34318	1.13234	0.506846	1.33722	0.237249	1.4019	0.291167	0.787235	0.129408	0.754882	0.0970563		93.0353
70	2000	1252	92.9414	47.5199	0.355062	16.9892	1.30297	4.86684	0.1095	11.9484	14.5626	1.15126	0.107595	0.0107595	1.07595	6.71057		26.4499	58.2	0.183534	0.647768	0.500749	81.4574	0.539803	1.51144	34.6598	317.402	0.043168	0.172738	0.0539806	132.183	7.44648	23.7333	1.72733	4.42625	0.680115	3.34654	1.13348	0.507356	1.33857	0.237488	1.40331	0.29146	0.788027	0.129539	0.755642	0.097154		92.9414
71	2000	1251	92.848	47.5265	0.35542	17.0063	1.30312	4.86399	0.109489	11.9105	14.5767	1.15242	0.107703	0.0107703	1.07703	6.70755		26.4765	58.2	0.183718	0.648419	0.50125	80.7758	0.540345	1.51296	34.6891	317.721	0.0432112	0.172912	0.0540349	132.308	7.45393	23.7569	1.72906	4.43069	0.680798	3.34991	1.13462	0.507865	1.33991	0.237726	1.40472	0.291753	0.788818	0.129669	0.756401	0.0972516		92.848
72	2000	1250	92.7548	47.5332	0.355777	17.0234	1.30327	4.86112	0.109477	11.8727	14.5909	1.15358	0.107811	0.0107811	1.07811	6.70451		26.5031	58.2	0.183902	0.64907	0.50175	80.1016	0.540887	1.51447	34.7183	318.039	0.0432543	0.173085	0.0540891	132.433	7.46137	23.7805	1.7308	4.43514	0.68148	3.35326	1.13576	0.508374	1.34125	0.237964	1.40613	0.292045	0.789608	0.129799	0.757159	0.097349		92.7548
73	2000	1249	92.662	47.5398	0.356133	17.0404	1.30341	4.85823	0.109466	11.835	14.605	1.15473	0.107919	0.0107919	1.07919	6.70144		26.5296	58.2	0.184086	0.649719	0.502249	79.4349	0.541428	1.51599	34.7475	318.357	0.0432973	0.173258	0.0541432	132.557	7.46879	23.8041	1.73253	4.43957	0.682161	3.35661	1.13689	0.508882	1.34259	0.238202	1.40753	0.292336	0.790397	0.129928	0.757915	0.0974462		92.662
74	2000	1248	92.5696	47.5464	0.356489	17.0574	1.30355	4.85533	0.109454	11.7973	14.619	1.15589	0.108027	0.0108027	1.08027	6.69836		26.556	58.2	0.18427	0.650367	0.502748	78.7755	0.541968	1.5175	34.7766	318.675	0.0433403	0.173431	0.0541972	132.682	7.47621	23.8276	1.73426	4.444	0.682841	3.35996	1.13802	0.509388	1.34393	0.238439	1.40894	0.292627	0.791184	0.130058	0.75867	0.0975433		92.5696
75	2000	1247	92.4775	47.553	0.356844	17.0744	1.30369	4.85242	0.109441	11.7598	14.6331	1.15704	0.108134	0.0108134	1.08134	6.69527		26.5824	58.2	0.184453	0.651014	0.503245	78.1233	0.542507	1.51901	34.8056	318.992	0.0433832	0.173604	0.0542511	132.806	7.48361	23.851	1.73598	4.44841	0.68352	3.3633	1.13915	0.509894	1.34526	0.238676	1.41033	0.292918	0.79197	0.130187	0.759423	0.0976401		92.4775
76	2000	1246	92.3857	47.5596	0.357198	17.0914	1.30383	4.84948	0.109429	11.7223	14.6471	1.15819	0.108242	0.0108242	1.08242	6.69214		26.6088	58.2	0.184636	0.65166	0.503742	77.4783	0.543045	1.52052	34.8346	319.308	0.043426	0.173776	0.0543049	132.93	7.49099	23.8745	1.7377	4.45283	0.684198	3.36663	1.14028	0.510399	1.3466	0.238912	1.41173	0.293208	0.792755	0.130316	0.760176	0.0977369		92.3857
77	2000	1245	92.2943	47.5662	0.357552	17.1083	1.30396	4.84653	0.109416	11.6849	14.6611	1.15934	0.108349	0.0108349	1.08349	6.68899		26.6351	58.2	0.184819	0.652305	0.504238	76.8402	0.543583	1.52202	34.8636	319.624	0.0434688	0.173948	0.0543587	133.053	7.49837	23.8978	1.73942	4.45723	0.684874	3.36996	1.14141	0.510904	1.34793	0.239148	1.41313	0.293498	0.793538	0.130445	0.760927	0.0978334		92.2943
78	2000	1244	92.2032	47.5727	0.357905	17.1252	1.3041	4.84356	0.109403	11.6476	14.6751	1.16048	0.108456	0.0108456	1.08456	6.68583		26.6614	58.2	0.185001	0.652948	0.504733	76.2091	0.544119	1.52352	34.8925	319.94	0.0435115	0.174119	0.0544123	133.177	7.50573	23.9212	1.74114	4.46163	0.685549	3.37328	1.14253	0.511407	1.34926	0.239384	1.41452	0.293787	0.79432	0.130573	0.761676	0.0979298		92.2032
79	2000	1243	92.1124	47.5793	0.358258	17.1421	1.30422	4.84058	0.10939	11.6104	14.6891	1.16162	0.108563	0.0108563	1.08563	6.68264		26.6876	58.2	0.185183	0.653591	0.505227	75.5848	0.544655	1.52502	34.9213	320.254	0.0435541	0.174291	0.0544659	133.3	7.51308	23.9445	1.74285	4.46601	0.686224	3.3766	1.14366	0.51191	1.35058	0.239619	1.41591	0.294076	0.7951	0.130701	0.762425	0.0980261		92.1124
80	2000	1242	92.022	47.5859	0.35861	17.1589	1.30435	4.83758	0.109377	11.5732	14.703	1.16277	0.10867	0.010867	1.0867	6.67944		26.7138	58.2	0.185365	0.654233	0.505721	74.9673	0.545189	1.52652	34.9501	320.569	0.0435966	0.174462	0.0545193	133.423	7.52042	23.9678	1.74456	4.4704	0.686897	3.37991	1.14478	0.512411	1.35191	0.239854	1.4173	0.294364	0.79588	0.13083	0.763172	0.0981221		92.022
81	2000	1241	91.9319	47.5925	0.358961	17.1758	1.30447	4.83456	0.109363	11.5362	14.7169	1.16391	0.108776	0.0108776	1.08776	6.6762		26.7399	58.2	0.185547	0.654873	0.506213	74.3565	0.545723	1.52801	34.9788	320.882	0.0436391	0.174633	0.0545727	133.546	7.52774	23.991	1.74627	4.47477	0.687569	3.38321	1.1459	0.512912	1.35323	0.240089	1.41868	0.294652	0.796658	0.130957	0.763918	0.0982181		91.9319
82	2000	1240	91.8421	47.599	0.359312	17.1925	1.30459	4.83153	0.109349	11.4992	14.7308	1.16504	0.108882	0.0108882	1.08882	6.67296		26.766	58.2	0.185728	0.655512	0.506705	73.7523	0.546255	1.5295	35.0075	321.196	0.0436815	0.174803	0.054626	133.668	7.53506	24.0142	1.74797	4.47914	0.688239	3.38651	1.14701	0.513412	1.35455	0.240323	1.42006	0.294939	0.797434	0.131085	0.764663	0.0983138		91.8421
83	2000	1239	91.7527	47.6056	0.359663	17.2093	1.30471	4.82848	0.109335	11.4623	14.7447	1.16618	0.108989	0.0108989	1.08989	6.66969		26.7921	58.2	0.185909	0.656151	0.507196	73.1546	0.546787	1.53099	35.0362	321.508	0.0437238	0.174973	0.0546792	133.79	7.54236	24.0373	1.74967	4.4835	0.688909	3.38981	1.14813	0.513911	1.35586	0.240556	1.42144	0.295226	0.798209	0.131213	0.765406	0.0984094		91.7527
84	2000	1238	91.6636	47.6121	0.360012	17.226	1.30482	4.82542	0.109321	11.4255	14.7585	1.16731	0.109095	0.0109095	1.09095	6.6664		26.8181	58.2	0.186089	0.656788	0.507686	72.5632	0.547318	1.53248	35.0647	321.82	0.043766	0.175143	0.0547323	133.913	7.54964	24.0604	1.75137	4.48785	0.689577	3.3931	1.14924	0.514409	1.35718	0.24079	1.42282	0.295512	0.798983	0.13134	0.766148	0.0985048		91.6636
85	2000	1237	91.5748	47.6186	0.360361	17.2427	1.30493	4.82233	0.109306	11.3888	14.7723	1.16844	0.1092	0.01092	1.092	6.66307		26.8441	58.2	0.186269	0.657424	0.508175	71.9783	0.547848	1.53396	35.0932	322.132	0.0438082	0.175313	0.0547853	134.034	7.55692	24.0835	1.75307	4.49219	0.690245	3.39638	1.15035	0.514907	1.35849	0.241022	1.4242	0.295797	0.799756	0.131467	0.766889	0.0986001		91.5748
86	2000	1236	91.4863	47.6252	0.36071	17.2594	1.30504	4.81924	0.109291	11.3522	14.7861	1.16957	0.109306	0.0109306	1.09306	6.65975		26.87	58.2	0.186449	0.658059	0.508664	71.3996	0.548377	1.53544	35.1217	322.443	0.0438503	0.175482	0.0548382	134.156	7.56418	24.1065	1.75476	4.49653	0.690911	3.39966	1.15146	0.515403	1.3598	0.241255	1.42557	0.296083	0.800527	0.131594	0.767629	0.0986951		91.4863
87	2000	1235	91.3982	47.6317	0.361058	17.2761	1.30515	4.81612	0.109276	11.3156	14.7999	1.1707	0.109411	0.0109411	1.09411	6.65639		26.8959	58.2	0.186629	0.658693	0.509151	70.827	0.548905	1.53692	35.1501	322.754	0.0438923	0.175651	0.054891	134.278	7.57143	24.1295	1.75645	4.50086	0.691576	3.40293	1.15257	0.515899	1.36111	0.241487	1.42694	0.296367	0.801297	0.13172	0.768367	0.0987901		91.3982
88	2000	1234	91.3103	47.6382	0.361405	17.2927	1.30525	4.81299	0.10926	11.2791	14.8136	1.17183	0.109517	0.0109517	1.09517	6.65302		26.9217	58.2	0.186808	0.659325	0.509638	70.2606	0.549433	1.5384	35.1785	323.064	0.0439343	0.17582	0.0549437	134.399	7.57867	24.1525	1.75813	4.50518	0.692239	3.40619	1.15368	0.516394	1.36241	0.241718	1.42831	0.296652	0.802066	0.131846	0.769104	0.0988848		91.3103
89	2000	1233	91.2228	47.6447	0.361752	17.3093	1.30535	4.80985	0.109245	11.2427	14.8273	1.17295	0.109622	0.0109622	1.09622	6.64963		26.9475	58.2	0.186987	0.659957	0.510124	69.7002	0.549959	1.53987	35.2068	323.373	0.0439762	0.175988	0.0549964	134.52	7.58589	24.1754	1.75982	4.50949	0.692902	3.40945	1.15478	0.516888	1.36372	0.24195	1.42968	0.296935	0.802833	0.131973	0.76984	0.0989794		91.2228
90	2000	1232	91.1356	47.6512	0.362098	17.3258	1.30545	4.80669	0.109229	11.2064	14.841	1.17407	0.109727	0.0109727	1.09727	6.64622		26.9732	58.2	0.187166	0.660588	0.510609	69.1457	0.550485	1.54134	35.2351	323.682	0.044018	0.176157	0.0550489	134.641	7.5931	24.1982	1.7615	4.5138	0.693564	3.41271	1.15588	0.517381	1.36502	0.242181	1.43104	0.297219	0.803599	0.132098	0.770574	0.0990739		91.1356
91	2000	1231	91.0488	47.6577	0.362443	17.3424	1.30555	4.80351	0.109213	11.1702	14.8547	1.17519	0.109831	0.0109831	1.09831	6.64278		26.9989	58.2	0.187344	0.661217	0.511093	68.5971	0.551009	1.54281	35.2633	323.99	0.0440597	0.176324	0.0551014	134.761	7.6003	24.2211	1.76318	4.5181	0.694224	3.41596	1.15698	0.517873	1.36632	0.242411	1.4324	0.297502	0.804364	0.132224	0.771308	0.0991681		91.0488
92	2000	1230	90.9622	47.6642	0.362788	17.3589	1.30564	4.80031	0.109196	11.1341	14.8683	1.17631	0.109936	0.0109936	1.09936	6.63932		27.0246	58.2	0.187522	0.661846	0.511576	68.0544	0.551533	1.54428	35.2914	324.298	0.0441014	0.176492	0.0551538	134.882	7.60749	24.2439	1.76485	4.52239	0.694883	3.4192	1.15808	0.518364	1.36761	0.242641	1.43376	0.297784	0.805127	0.13235	0.77204	0.0992622		90.9622
93	2000	1229	90.876	47.6707	0.363132	17.3753	1.30573	4.7971	0.10918	11.098	14.8819	1.17743	0.11004	0.011004	1.1004	6.63584		27.0502	58.2	0.1877	0.662473	0.512059	67.5173	0.552055	1.54574	35.3195	324.606	0.044143	0.176659	0.055206	135.002	7.61467	24.2666	1.76652	4.52667	0.695542	3.42244	1.15918	0.518855	1.36891	0.242871	1.43512	0.298066	0.805889	0.132475	0.77277	0.0993562		90.876
94	2000	1228	90.7901	47.6772	0.363476	17.3918	1.30582	4.79388	0.109163	11.062	14.8955	1.17854	0.110144	0.0110144	1.10144	6.63235		27.0757	58.2	0.187877	0.663099	0.51254	66.9859	0.552577	1.5472	35.3475	324.912	0.0441845	0.176826	0.0552582	135.122	7.62183	24.2893	1.76819	4.53095	0.696199	3.42567	1.16027	0.519345	1.3702	0.2431	1.43647	0.298347	0.80665	0.1326	0.7735	0.09945		90.7901
95	2000	1227	90.7044	47.6837	0.363819	17.4082	1.3059	4.79064	0.109146	11.0261	14.9091	1.17966	0.110248	0.0110248	1.10248	6.62883		27.1013	58.2	0.188054	0.663724	0.513021	66.4601	0.553098	1.54866	35.3755	325.219	0.044226	0.176993	0.0553103	135.242	7.62898	24.312	1.76986	4.53522	0.696854	3.4289	1.16137	0.519833	1.37149	0.243329	1.43782	0.298628	0.807409	0.132725	0.774228	0.0995436		90.7044
96	2000	1226	90.6191	47.6901	0.364162	17.4246	1.30598	4.78738	0.109128	10.9903	14.9226	1.18077	0.110352	0.0110352	1.10352	6.62529		27.1267	58.2	0.188231	0.664349	0.513501	65.9397	0.553618	1.55012	35.4035	325.524	0.0442673	0.177159	0.0553623	135.361	7.63612	24.3346	1.77152	4.53948	0.697509	3.43212	1.16246	0.520321	1.37278	0.243557	1.43917	0.298908	0.808167	0.132849	0.774955	0.099637		90.6191
97	2000	1225	90.5341	47.6966	0.364503	17.4409	1.30606	4.78411	0.109111	10.9546	14.9362	1.18187	0.110456	0.0110456	1.10456	6.62174		27.1522	58.2	0.188408	0.664972	0.51398	65.4249	0.554137	1.55157	35.4313	325.83	0.0443086	0.177326	0.0554142	135.48	7.64324	24.3572	1.77318	4.54374	0.698163	3.43533	1.16354	0.520809	1.37406	0.243785	1.44052	0.299188	0.808924	0.132974	0.77568	0.0997303		90.5341
98	2000	1224	90.4494	47.703	0.364845	17.4573	1.30614	4.78082	0.109093	10.9189	14.9497	1.18298	0.110559	0.0110559	1.10559	6.61816		27.1776	58.2	0.188584	0.665593	0.514458	64.9154	0.554655	1.55302	35.4592	326.134	0.0443499	0.177491	0.0554661	135.599	7.65035	24.3798	1.77484	4.54799	0.698815	3.43854	1.16463	0.521295	1.37535	0.244013	1.44186	0.299467	0.809679	0.133098	0.776405	0.0998235		90.4494
99	2000	1223	90.365	47.7095	0.365185	17.4736	1.30621	4.77751	0.109075	10.8834	14.9631	1.18409	0.110662	0.0110662	1.10662	6.61455		27.2029	58.2	0.18876	0.666214	0.514936	64.4112	0.555173	1.55447	35.487	326.438	0.044391	0.177657	0.0555178	135.718	7.65745	24.4023	1.7765	4.55223	0.699466	3.44175	1.16572	0.52178	1.37663	0.24424	1.44321	0.299746	0.810433	0.133222	0.777128	0.0999164		90.365
100	2000	1222	90.281	47.7159	0.365526	17.4898	1.30628	4.77419	0.109056	10.8479	14.9766	1.18519	0.110765	0.0110765	1.10765	6.61094		27.2282	58.2	0.188935	0.666834	0.515412	63.9123	0.555689	1.55592	35.5147	326.742	0.0444321	0.177822	0.0555694	135.837	7.66454	24.4248	1.77815	4.55646	0.700116	3.44494	1.1668	0.522265	1.37791	0.244467	1.44455	0.300025	0.811186	0.133346	0.77785	0.100009		90.281
101	2000	1221	90.1972	47.7224	0.365865	17.5061	1.30635	4.77085	0.109038	10.8125	14.99	1.18629	0.110868	0.0110868	1.10868	6.60729		27.2534	58.2	0.189111	0.667453	0.515888	63.4185	0.556205	1.55736	35.5423	327.045	0.0444731	0.177987	0.055621	135.955	7.67161	24.4472	1.7798	4.56068	0.700765	3.44814	1.16788	0.522749	1.37918	0.244693	1.44589	0.300302	0.811937	0.133469	0.77857	0.100102		90.1972
102	2000	1220	90.1137	47.7288	0.366204	17.5223	1.30641	4.7675	0.109019	10.7772	15.0034	1.18739	0.110971	0.0110971	1.10971	6.60363		27.2786	58.2	0.189286	0.66807	0.516363	62.9299	0.556719	1.5588	35.57	327.348	0.0445141	0.178152	0.0556724	136.074	7.67868	24.4696	1.78144	4.5649	0.701413	3.45132	1.16896	0.523232	1.38046	0.24492	1.44722	0.30058	0.812688	0.133592	0.779289	0.100194		90.1137
103	2000	1219	90.0305	47.7352	0.366542	17.5385	1.30648	4.76413	0.109	10.7419	15.0168	1.18849	0.111073	0.0111073	1.11073	6.59996		27.3038	58.2	0.18946	0.668687	0.516837	62.4463	0.557233	1.56024	35.5975	327.65	0.0445549	0.178316	0.0557238	136.192	7.68573	24.4919	1.78309	4.56911	0.70206	3.45451	1.17004	0.523714	1.38173	0.245145	1.44855	0.300857	0.813436	0.133716	0.780007	0.100287		90.0305
104	2000	1218	89.9476	47.7416	0.36688	17.5547	1.30654	4.76075	0.108981	10.7068	15.0301	1.18958	0.111176	0.0111176	1.11176	6.59626		27.3289	58.2	0.189635	0.669302	0.517311	61.9677	0.557746	1.56167	35.625	327.951	0.0445957	0.17848	0.0557751	136.31	7.69276	24.5142	1.78473	4.57331	0.702706	3.45768	1.17111	0.524195	1.383	0.24537	1.44988	0.301133	0.814184	0.133838	0.780724	0.100379		89.9476
105	2000	1217	89.8651	47.748	0.367217	17.5708	1.30659	4.75735	0.108961	10.6717	15.0435	1.19067	0.111278	0.0111278	1.11278	6.59253		27.354	58.2	0.189809	0.669916	0.517783	61.4941	0.558257	1.56311	35.6525	328.252	0.0446365	0.178644	0.0558263	136.427	7.69979	24.5365	1.78636	4.57751	0.70335	3.46085	1.17219	0.524675	1.38426	0.245595	1.45121	0.301409	0.81493	0.133961	0.78144	0.100471		89.8651
106	2000	1216	89.7828	47.7544	0.367554	17.5869	1.30665	4.75394	0.108942	10.6367	15.0568	1.19177	0.11138	0.011138	1.1138	6.58881		27.379	58.2	0.189982	0.670529	0.518255	61.0253	0.558768	1.56454	35.6799	328.552	0.0446771	0.178808	0.0558774	136.545	7.7068	24.5588	1.788	4.5817	0.703993	3.46402	1.17326	0.525155	1.38553	0.24582	1.45254	0.301685	0.815675	0.134084	0.782154	0.100563		89.7828
107	2000	1215	89.7008	47.7608	0.36789	17.603	1.3067	4.75051	0.108922	10.6018	15.0701	1.19285	0.111482	0.0111482	1.11482	6.58504		27.404	58.2	0.190156	0.671142	0.518725	60.5613	0.559278	1.56597	35.7073	328.852	0.0447177	0.178971	0.0559284	136.662	7.7138	24.581	1.78963	4.58588	0.704635	3.46718	1.17433	0.525633	1.38679	0.246044	1.45386	0.30196	0.816418	0.134206	0.782867	0.100654		89.7008
108	2000	1214	89.6191	47.7672	0.368225	17.619	1.30675	4.74706	0.108901	10.567	15.0833	1.19394	0.111583	0.0111583	1.11583	6.58126		27.429	58.2	0.190329	0.671753	0.519195	60.1021	0.559788	1.56739	35.7346	329.152	0.0447582	0.179134	0.0559793	136.779	7.72079	24.6031	1.79126	4.59005	0.705276	3.47033	1.17539	0.526111	1.38805	0.246268	1.45518	0.302234	0.81716	0.134328	0.783579	0.100746		89.6191
109	2000	1213	89.5377	47.7736	0.36856	17.635	1.3068	4.7436	0.108881	10.5323	15.0965	1.19503	0.111685	0.0111685	1.11685	6.57747		27.4539	58.2	0.190502	0.672363	0.519664	59.6475	0.560296	1.56881	35.7618	329.451	0.0447986	0.179296	0.0560302	136.895	7.72777	24.6252	1.79289	4.59422	0.705916	3.47348	1.17646	0.526588	1.38931	0.246491	1.4565	0.302508	0.817901	0.13445	0.784289	0.100837		89.5377
110	2000	1212	89.4566	47.78	0.368894	17.651	1.30684	4.74013	0.10886	10.4976	15.1098	1.19611	0.111786	0.0111786	1.11786	6.57365		27.4787	58.2	0.190674	0.672971	0.520133	59.1976	0.560803	1.57023	35.789	329.749	0.044839	0.179459	0.0560809	137.012	7.73473	24.6473	1.79451	4.59837	0.706555	3.47662	1.17752	0.527064	1.39057	0.246714	1.45782	0.302782	0.818641	0.134571	0.784998	0.100928		89.4566
111	2000	1211	89.3757	47.7863	0.369228	17.667	1.30688	4.73664	0.108839	10.463	15.1229	1.19719	0.111887	0.0111887	1.11887	6.56981		27.5035	58.2	0.190846	0.673579	0.5206	58.7523	0.56131	1.57165	35.8162	330.047	0.0448793	0.179621	0.0561315	137.128	7.74168	24.6693	1.79613	4.60253	0.707193	3.47976	1.17859	0.527539	1.39182	0.246936	1.45913	0.303055	0.819379	0.134692	0.785706	0.101019		89.3757
112	2000	1210	88.7572	47.7648	0.370953	17.7543	1.30714	4.74616	0.109566	10.4115	15.0801	1.20484	0.112667	0.0112667	1.12667	6.58065		27.6953	57.8135	0.192177	0.677272	0.524158	55.5233	0.565185	1.5826	36.043	332.225	0.045186	0.180872	0.0565225	136.875	7.76668	24.8246	1.80733	4.62957	0.711033	3.49689	1.18333	0.529489	1.39661	0.247745	1.46382	0.30404	0.822134	0.135166	0.78861	0.101411		88.7572
113	2000	1209	88.1184	47.742	0.372738	17.8453	1.30737	4.75626	0.110333	10.3593	15.0342	1.21284	0.113484	0.0113484	1.13484	6.5921		27.896	57.4119	0.19357	0.681126	0.527883	52.3578	0.569242	1.59406	36.2803	334.505	0.0455072	0.182181	0.0569319	136.605	7.79241	24.9869	1.81905	4.65781	0.715036	3.51472	1.18824	0.531504	1.40155	0.248578	1.46865	0.305055	0.824972	0.135655	0.791609	0.101817		88.1184
114	2000	1208	87.488	47.7194	0.374509	17.936	1.30757	4.76625	0.111101	10.3073	14.9883	1.22085	0.114301	0.0114301	1.14301	6.6034		28.0971	57.0154	0.194965	0.68498	0.531613	49.3893	0.573304	1.60554	36.5177	336.788	0.0458287	0.183492	0.0573419	136.337	7.81794	25.1493	1.83076	4.68604	0.719035	3.53251	1.19313	0.533507	1.40645	0.249405	1.47344	0.306061	0.827789	0.13614	0.794589	0.102219		87.488
115	2000	1207	86.8657	47.697	0.376264	18.0265	1.30774	4.77613	0.111869	10.2554	14.9424	1.22886	0.11512	0.011512	1.1512	6.61455		28.2984	56.6238	0.196362	0.688832	0.535346	46.6046	0.577371	1.61704	36.7552	339.073	0.0461505	0.184805	0.0577523	136.07	7.84325	25.3118	1.84248	4.71426	0.723029	3.55026	1.198	0.535498	1.41132	0.250225	1.47819	0.30706	0.830584	0.136622	0.79755	0.10262		86.8657
116	2000	1206	86.2515	47.6749	0.378005	18.1168	1.30787	4.7859	0.112639	10.2036	14.8964	1.23687	0.11594	0.011594	1.1594	6.62554		28.4999	56.2372	0.19776	0.692683	0.539084	43.9913	0.581444	1.62854	36.9927	341.36	0.0464728	0.18612	0.0581633	135.806	7.86835	25.4744	1.8542	4.74247	0.727018	3.56796	1.20284	0.537477	1.41616	0.251039	1.4829	0.30805	0.833356	0.1371	0.800491	0.103018		86.2515
117	2000	1205	85.6451	47.653	0.37973	18.207	1.30798	4.79555	0.113409	10.152	14.8504	1.2449	0.116761	0.0116761	1.16761	6.63637		28.7017	55.8554	0.199161	0.696533	0.542826	41.538	0.58552	1.64007	37.2302	343.65	0.0467953	0.187436	0.0585748	135.544	7.89325	25.6371	1.86593	4.77067	0.731003	3.58563	1.20766	0.539444	1.42096	0.251846	1.48757	0.309032	0.836107	0.137575	0.803412	0.103414		85.6451
118	2000	1204	85.0464	47.6313	0.381441	18.2969	1.30805	4.8051	0.114181	10.1006	14.8043	1.25292	0.117583	0.0117583	1.17583	6.64705		28.9038	55.4783	0.200563	0.700382	0.546572	39.234	0.589602	1.6516	37.4678	345.942	0.0471183	0.188754	0.0589868	135.284	7.91793	25.7998	1.87765	4.79886	0.734982	3.60325	1.21245	0.5414	1.42572	0.252647	1.4922	0.310005	0.838835	0.138046	0.806313	0.103807		85.0464
119	2000	1203	84.4554	47.6099	0.383135	18.3867	1.30809	4.81453	0.114953	10.0493	14.7582	1.26095	0.118406	0.0118406	1.18406	6.65757		29.1061	55.1059	0.201967	0.70423	0.550323	37.0696	0.593689	1.66316	37.7055	348.237	0.0474416	0.190074	0.0593994	135.025	7.9424	25.9627	1.88939	4.82704	0.738957	3.62083	1.21722	0.543343	1.43046	0.253441	1.49679	0.31097	0.841542	0.138514	0.809194	0.104198		84.4554
120	2000	1202	83.8718	47.5886	0.384815	18.4762	1.3081	4.82385	0.115726	9.99822	14.712	1.26899	0.11923	0.011923	1.1923	6.66793		29.3087	54.738	0.203372	0.708077	0.554077	35.0356	0.59778	1.67472	37.9432	350.533	0.0477653	0.191395	0.0598124	134.769	7.96665	26.1257	1.90112	4.85521	0.742926	3.63837	1.22197	0.545274	1.43515	0.254229	1.50135	0.311927	0.844226	0.138978	0.812056	0.104586		83.8718
121	2000	1201	83.2955	47.5676	0.386479	18.5655	1.30807	4.83307	0.116499	9.94727	14.6658	1.27703	0.120055	0.0120055	1.20055	6.67815		29.5115	54.3746	0.204779	0.711923	0.557836	33.1234	0.601876	1.6863	38.1809	352.833	0.0480893	0.192718	0.0602259	134.514	7.9907	26.2887	1.91285	4.88337	0.746891	3.65587	1.2267	0.547194	1.43982	0.25501	1.50586	0.312876	0.846888	0.139439	0.814898	0.104972		83.2955
122	2000	1200	82.7264	47.5468	0.388127	18.6547	1.30802	4.84217	0.117274	9.89648	14.6196	1.28507	0.12088	0.012088	1.2088	6.68821		29.7145	54.0157	0.206188	0.715768	0.561598	31.3253	0.605977	1.6979	38.4186	355.134	0.0484137	0.194042	0.06064	134.261	8.01453	26.4519	1.92459	4.91151	0.750851	3.67333	1.2314	0.549101	1.44444	0.255785	1.51033	0.313816	0.849528	0.139896	0.817719	0.105356		82.7264
123	2000	1199	82.1643	47.5263	0.389759	18.7436	1.30793	4.85116	0.118049	9.84585	14.5733	1.29312	0.121707	0.0121707	1.21707	6.69811		29.9178	53.661	0.207599	0.719611	0.565365	29.6338	0.610083	1.7095	38.6563	357.438	0.0487384	0.195368	0.0610545	134.01	8.03815	26.6151	1.93633	4.93965	0.754805	3.69074	1.23608	0.550996	1.44904	0.256553	1.51476	0.314748	0.852146	0.140349	0.820521	0.105737		82.1643
124	2000	1198	81.6092	47.5059	0.391374	18.8324	1.30782	4.86003	0.118825	9.79537	14.527	1.30117	0.122535	0.0122535	1.22535	6.70785		30.1213	53.3106	0.209011	0.723454	0.569135	28.0421	0.614192	1.72112	38.8941	359.744	0.0490634	0.196695	0.0614695	133.76	8.06156	26.7784	1.94808	4.96777	0.758754	3.70811	1.24073	0.552879	1.45359	0.257315	1.51916	0.315672	0.854741	0.140799	0.823302	0.106115		81.6092
125	2000	1197	81.061	47.4858	0.392974	18.9209	1.30768	4.8688	0.119602	9.74506	14.4806	1.30923	0.123364	0.0123364	1.23364	6.71746		30.3251	52.9644	0.210425	0.727295	0.57291	26.5439	0.618307	1.73276	39.1319	362.053	0.0493888	0.198024	0.061885	133.513	8.08475	26.9418	1.95982	4.99587	0.762698	3.72544	1.24536	0.55475	1.45812	0.25807	1.52351	0.316587	0.857314	0.141245	0.826063	0.106491		81.061
126	2000	1196	80.5194	47.4659	0.394557	19.0093	1.3075	4.87746	0.12038	9.6949	14.4342	1.31729	0.124194	0.0124194	1.24194	6.7269		30.5291	52.6224	0.211841	0.731135	0.576688	25.1331	0.622426	1.74441	39.3697	364.363	0.0497145	0.199355	0.0623009	133.267	8.10773	27.1052	1.97157	5.02397	0.766637	3.74273	1.24996	0.556609	1.46261	0.258819	1.52782	0.317494	0.859864	0.141688	0.828804	0.106865		80.5194
127	2000	1195	79.9845	47.4462	0.396123	19.0974	1.3073	4.88601	0.121159	9.64491	14.3878	1.32536	0.125024	0.0125024	1.25024	6.7362		30.7333	52.2843	0.213258	0.734974	0.58047	23.8044	0.626549	1.75607	39.6075	366.676	0.0500405	0.200687	0.0627173	133.023	8.1305	27.2687	1.98331	5.05205	0.77057	3.75997	1.25454	0.558455	1.46706	0.259561	1.53209	0.318392	0.862392	0.142127	0.831525	0.107236		79.9845
128	2000	1194	79.456	47.4267	0.397672	19.1853	1.30706	4.89444	0.121938	9.59508	14.3413	1.33343	0.125856	0.0125856	1.25856	6.74533		30.9378	51.9503	0.214677	0.738811	0.584255	22.5524	0.630676	1.76774	39.8453	368.991	0.0503668	0.20202	0.0631342	132.781	8.15305	27.4323	1.99506	5.08012	0.774498	3.77717	1.2591	0.56029	1.47148	0.260296	1.53633	0.319282	0.864897	0.142562	0.834225	0.107605		79.456
129	2000	1193	78.9339	47.4075	0.399205	19.2731	1.3068	4.90277	0.122718	9.5454	14.2948	1.3415	0.126688	0.0126688	1.26688	6.75432		31.1425	51.6201	0.216097	0.742648	0.588045	21.3725	0.634808	1.77943	40.0831	371.308	0.0506935	0.203355	0.0635515	132.54	8.17538	27.596	2.00681	5.10817	0.77842	3.79432	1.26363	0.562112	1.47586	0.261025	1.54052	0.320164	0.86738	0.142994	0.836905	0.107971		78.9339
130	2000	1192	78.4181	47.3885	0.40072	19.3606	1.30651	4.91099	0.123499	9.49589	14.2482	1.34958	0.127522	0.0127522	1.27522	6.76317		31.3474	51.2939	0.217519	0.746482	0.591837	20.2601	0.638944	1.79113	40.3209	373.627	0.0510205	0.204691	0.0639693	132.301	8.1975	27.7598	2.01857	5.1362	0.782337	3.81143	1.26814	0.563922	1.48021	0.261747	1.54467	0.321037	0.86984	0.143422	0.839565	0.108334		78.4181
131	2000	1191	77.8016	47.3744	0.402783	19.4346	1.30751	4.92349	0.124407	9.44637	14.2012	1.35849	0.128522	0.0128532	1.28532	6.77805		31.5804	51.0298	0.219243	0.751348	0.596444	19.1975	0.643701	1.80528	40.6118	375.525	0.0514182	0.2063	0.0644678	132.253	8.23081	27.9617	2.03278	5.17062	0.787243	3.83345	1.27433	0.566485	1.48655	0.262824	1.55093	0.32235	0.873493	0.144047	0.843379	0.108847		77.8016
132	2000	1190	76.7286	47.3816	0.407343	19.4492	1.3143	4.95536	0.125874	9.39628	14.1523	1.37111	0.130264	0.013033	1.3033	6.82026		31.9369	51.0282	0.222305	0.760802	0.604663	18.1458	0.651195	1.8303	41.1387	375.544	0.05213	0.209116	0.0653234	133.049	8.31465	28.3333	2.0579	5.23341	0.796567	3.87744	1.28806	0.57244	1.50188	0.265502	1.56668	0.325644	0.882531	0.145562	0.852402	0.110032		76.7286
133	2000	1189	75.6832	47.389	0.411889	19.4637	1.32104	4.98708	0.127341	9.34632	14.1034	1.38373	0.132008	0.013213	1.3213	6.86224		32.2922	51.0255	0.225362	0.770224	0.612864	17.164	0.658661	1.85527	41.6639	375.577	0.0528403	0.211925	0.0661769	133.836	8.39786	28.7038	2.08294	5.29596	0.805851	3.92121	1.3017	0.578355	1.51709	0.26816	1.58232	0.328915	0.891502	0.147066	0.861365	0.11121		75.6832
134	2000	1188	74.6645	47.3964	0.416422	19.4782	1.32772	5.01865	0.128806	9.29647	14.0545	1.39634	0.133755	0.0133933	1.33933	6.904		32.6471	51.0232	0.228423	0.779648	0.621076	16.2463	0.66612	1.88028	42.1894	375.607	0.0535515	0.214738	0.0670311	134.619	8.48079	29.0747	2.10797	5.35848	0.815126	3.96492	1.31532	0.584254	1.53227	0.27081	1.59791	0.332174	0.900447	0.148565	0.870304	0.112384		74.6645
135	2000	1187	73.6713	47.4039	0.42094	19.4926	1.33436	5.05007	0.130271	9.24675	14.0057	1.40894	0.135503	0.0135738	1.35738	6.94555		33.0017	51.0212	0.231489	0.789074	0.629299	15.3877	0.673574	1.90532	42.715	375.635	0.0542638	0.217554	0.0678859	135.397	8.56346	29.4459	2.133	5.42097	0.824395	4.00858	1.3289	0.590137	1.54739	0.273451	1.61345	0.335423	0.909364	0.15006	0.879221	0.113556		73.6713
136	2000	1186	72.7028	47.4116	0.425445	19.5069	1.34095	5.08134	0.131734	9.19715	13.9569	1.42154	0.137253	0.0137546	1.37546	6.98688		33.3559	51.0196	0.234559	0.798502	0.637532	14.5839	0.681021	1.9304	43.2409	375.66	0.0549769	0.220373	0.0687414	136.172	8.64585	29.8174	2.15802	5.48344	0.833655	4.05217	1.34245	0.596005	1.56247	0.276084	1.62894	0.338662	0.918254	0.151551	0.888114	0.114726		72.7028
137	2000	1185	71.7581	47.4193	0.429935	19.5212	1.34749	5.11246	0.133197	9.14768	13.9081	1.43414	0.139005	0.0139357	1.39357	7.028		33.7099	51.0184	0.237634	0.807932	0.645775	13.8309	0.688462	1.95551	43.767	375.682	0.0556911	0.223196	0.0695976	136.942	8.72799	30.1892	2.18304	5.54588	0.842909	4.09572	1.35597	0.601856	1.57751	0.278708	1.64437	0.341891	0.927117	0.153038	0.896985	0.115892		71.7581
138	2000	1184	70.8364	47.4271	0.434411	19.5354	1.35398	5.14344	0.134658	9.09833	13.8594	1.44674	0.14076	0.014117	1.4117	7.06891		34.0635	51.0175	0.240713	0.817365	0.654029	13.1248	0.695897	1.98065	44.2933	375.703	0.0564061	0.226021	0.0704544	137.709	8.80985	30.5614	2.20806	5.6083	0.852155	4.13921	1.36946	0.607693	1.5925	0.281324	1.65976	0.345109	0.935954	0.154521	0.905833	0.117056		70.8364
139	2000	1183	69.9367	47.4351	0.438872	19.5495	1.36042	5.17426	0.136118	9.0491	13.8106	1.45933	0.142516	0.0142986	1.42986	7.1096		34.4168	51.0171	0.243797	0.826799	0.662293	12.4623	0.703325	2.00583	44.8198	375.72	0.0571221	0.22885	0.0713118	138.472	8.89145	30.9338	2.23307	5.67069	0.861393	4.18264	1.38292	0.613513	1.60745	0.283932	1.67509	0.348316	0.944763	0.155999	0.914658	0.118217		69.9367
140	2000	1182	69.0585	47.4431	0.443319	19.5636	1.36681	5.20495	0.137577	9	13.762	1.47191	0.144274	0.0144805	1.44805	7.15009		34.7698	51.0169	0.246884	0.836235	0.670567	11.8402	0.710748	2.03104	45.3465	375.736	0.057839	0.231682	0.0721698	139.232	8.97279	31.3065	2.25808	5.73305	0.870624	4.22601	1.39635	0.619319	1.62235	0.286531	1.69038	0.351514	0.953546	0.157473	0.92346	0.119376		69.0585
141	2000	1181	68.2009	47.4512	0.447752	19.5776	1.37316	5.23549	0.139035	8.95103	13.7133	1.4845	0.146034	0.0146626	1.46626	7.19037		35.1225	51.0172	0.249976	0.845673	0.67885	11.2558	0.718165	2.05628	45.8734	375.749	0.0585567	0.234516	0.0730285	139.987	9.05387	31.6795	2.28308	5.79539	0.879848	4.26933	1.40975	0.625109	1.63721	0.289122	1.70562	0.354702	0.962302	0.158944	0.93224	0.120531		68.2009
142	2000	1180	67.3632	47.4595	0.452169	19.5915	1.37947	5.26588	0.140492	8.90218	13.6647	1.49708	0.147795	0.0148449	1.48449	7.23045		35.4749	51.0178	0.253072	0.855113	0.687144	10.7062	0.725575	2.08155	46.4004	375.759	0.0592754	0.237354	0.0738877	140.74	9.13468	32.0528	2.30808	5.85769	0.889064	4.3126	1.42312	0.630884	1.65203	0.291705	1.72081	0.357879	0.971032	0.16041	0.940997	0.121685		67.3632
143	2000	1179	66.5448	47.4678	0.456572	19.6053	1.38572	5.29614	0.141948	8.85346	13.616	1.50965	0.149559	0.0150275	1.50275	7.27032		35.827	51.0187	0.256172	0.864555	0.695446	10.1892	0.732979	2.10685	46.9276	375.767	0.0599949	0.240195	0.0747475	141.488	9.21524	32.4264	2.33307	5.91997	0.898272	4.3558	1.43646	0.636643	1.6668	0.29428	1.73594	0.361046	0.979735	0.161872	0.949732	0.122835		66.5448
144	2000	1178	65.745	47.4762	0.46096	19.6191	1.39194	5.32625	0.143403	8.80487	13.5675	1.52222	0.151324	0.0152103	1.52103	7.31		36.1788	51.02	0.259276	0.873999	0.703758	9.70245	0.740377	2.13219	47.455	375.773	0.0607153	0.243038	0.0756078	142.234	9.29554	32.8002	2.35806	5.98222	0.907473	4.39895	1.44977	0.642388	1.68153	0.296847	1.75103	0.364203	0.988412	0.163329	0.958445	0.123983		65.745
145	2000	1177	64.9632	47.4847	0.465333	19.6328	1.39811	5.35623	0.144857	8.75641	13.5189	1.53479	0.153091	0.0153933	1.53933	7.34948		36.5303	51.0216	0.262383	0.883444	0.71208	9.2439	0.747769	2.15755	47.9826	375.777	0.0614365	0.245884	0.0764688	142.976	9.37558	33.1743	2.38304	6.04445	0.916666	4.44205	1.46305	0.648117	1.69621	0.299405	1.76607	0.367351	0.997063	0.164783	0.967135	0.125128		64.9632
146	2000	1176	64.1989	47.4933	0.469691	19.6464	1.40423	5.38607	0.14631	8.70808	13.4704	1.54735	0.15486	0.0155766	1.55766	7.38875		36.8814	51.0236	0.265495	0.892891	0.72041	8.81167	0.755155	2.18295	48.5103	375.778	0.0621585	0.248733	0.0773302	143.715	9.45536	33.5487	2.40802	6.10664	0.925852	4.48509	1.4763	0.653831	1.71085	0.301956	1.78107	0.370488	1.00569	0.166233	0.975802	0.12627		64.1989
147	2000	1175	63.4514	47.5021	0.474033	19.66	1.41031	5.41577	0.147762	8.65987	13.4219	1.55991	0.156631	0.0157601	1.57601	7.42783		37.2323	51.0259	0.268611	0.902339	0.728749	8.40398	0.762534	2.20837	49.0381	375.776	0.0628813	0.251584	0.0781922	144.45	9.53489	33.9234	2.433	6.1688	0.93503	4.52807	1.48952	0.65953	1.72545	0.304498	1.79601	0.373615	1.01429	0.167678	0.984447	0.12741		63.4514
148	2000	1174	62.7202	47.5109	0.47836	19.6734	1.41635	5.44533	0.149212	8.6118	13.3735	1.57246	0.158403	0.0159438	1.59438	7.46672		37.5829	51.0286	0.27173	0.911788	0.737097	8.01922	0.769907	2.23382	49.5661	375.773	0.063605	0.254438	0.0790547	145.183	9.61416	34.2983	2.45796	6.23093	0.9442	4.571	1.50271	0.665214	1.74001	0.307033	1.81091	0.376732	1.02286	0.16912	0.99307	0.128547		62.7202
149	2000	1173	62.0049	47.5198	0.482671	19.6868	1.42235	5.47475	0.150662	8.56386	13.325	1.58501	0.160177	0.0161278	1.61278	7.50541		37.9332	51.0316	0.274853	0.921239	0.745454	7.65589	0.777274	2.2593	50.0943	375.767	0.0643294	0.257295	0.0799176	145.912	9.69318	34.6734	2.48292	6.29304	0.953362	4.61387	1.51586	0.670883	1.75452	0.309559	1.82575	0.37984	1.0314	0.170557	1.00167	0.129681		62.0049
150	2000	1172	61.3049	47.5288	0.486967	19.7001	1.4283	5.50404	0.15211	8.51605	13.2766	1.59755	0.161952	0.0163119	1.63119	7.5439		38.2831	51.0349	0.277979	0.930692	0.753819	7.31259	0.784635	2.28481	50.6225	375.759	0.0650546	0.260154	0.0807811	146.638	9.77194	35.0488	2.50788	6.35511	0.962517	4.65669	1.529	0.676538	1.76899	0.312078	1.84055	0.382937	1.03993	0.17199	1.01025	0.130813		61.3049
151	2000	1171	60.6198	47.5378	0.491247	19.7133	1.43422	5.5332	0.153557	8.46838	13.2283	1.61009	0.163729	0.0164963	1.64963	7.58222		38.6328	51.0386	0.28111	0.940145	0.762192	6.98803	0.791989	2.31035	51.1508	375.748	0.0657805	0.263016	0.081645	147.362	9.85045	35.4244	2.53282	6.41715	0.971663	4.69945	1.5421	0.682177	1.78341	0.314588	1.85531	0.386025	1.04842	0.17342	1.01881	0.131942		60.6198
152	2000	1170	59.9491	47.547	0.49551	19.7265	1.44009	5.56222	0.155003	8.42084	13.1799	1.62262	0.165508	0.0166808	1.66808	7.62033		38.9822	51.0426	0.284243	0.9496	0.770574	6.68104	0.799337	2.33591	51.6793	375.735	0.0665072	0.26588	0.0825094	148.082	9.92871	35.8003	2.55776	6.47916	0.980802	4.74215	1.55517	0.687801	1.7978	0.317091	1.87001	0.389103	1.05689	0.174845	1.02734	0.133069		59.9491
153	2000	1169	59.2923	47.5563	0.499758	19.7395	1.44592	5.59111	0.156448	8.37343	13.1316	1.63515	0.167288	0.0168656	1.68656	7.65826		39.3313	51.0469	0.28738	0.959055	0.778963	6.39049	0.806679	2.3615	52.2079	375.72	0.0672346	0.268746	0.0833742	148.8	10.0067	36.1764	2.5827	6.54113	0.989933	4.78479	1.56821	0.693411	1.81214	0.319586	1.88467	0.392171	1.06533	0.176266	1.03585	0.134192		59.2923
154	2000	1168	58.6491	47.5657	0.50399	19.7525	1.45172	5.61987	0.157892	8.32616	13.0834	1.64767	0.169069	0.0170506	1.70506	7.69602		39.68	51.0516	0.290521	0.968512	0.78736	6.11537	0.814013	2.38711	52.7365	375.702	0.0679628	0.271615	0.0842394	149.514	10.0845	36.5527	2.60762	6.60308	0.999056	4.82738	1.58122	0.699006	1.82644	0.322073	1.89928	0.395229	1.07375	0.177683	1.04434	0.135313		58.6491
155	2000	1167	58.019	47.5751	0.508205	19.7654	1.45747	5.64849	0.159335	8.27902	13.0351	1.66019	0.170852	0.0172357	1.72357	7.73357		40.0285	51.0566	0.293664	0.977969	0.795765	5.85471	0.821342	2.41275	53.2652	375.682	0.0686916	0.274486	0.085105	150.226	10.162	36.9292	2.63254	6.66499	1.00817	4.86991	1.5942	0.704586	1.8407	0.324552	1.91384	0.398278	1.08214	0.179096	1.05281	0.136432		58.019
156	2000	1166	57.4017	47.5847	0.512404	19.7782	1.46318	5.67698	0.160776	8.23202	12.9869	1.6727	0.172636	0.0174211	1.74211	7.77094		40.3766	51.0619	0.296811	0.987427	0.804177	5.60763	0.828664	2.43842	53.794	375.66	0.0694211	0.277359	0.085971	150.936	10.2392	37.3059	2.65745	6.72686	1.01728	4.91239	1.60715	0.710151	1.85491	0.327023	1.92835	0.401316	1.09051	0.180505	1.06125	0.137548		57.4017
157	2000	1165	56.7968	47.5943	0.516586	19.7909	1.46886	5.70534	0.162217	8.18516	12.9387	1.68521	0.174422	0.0176066	1.76066	7.80813		40.7245	51.0676	0.299961	0.996885	0.812596	5.37331	0.835979	2.46411	54.3229	375.635	0.0701513	0.280235	0.0868374	151.642	10.3162	37.6828	2.68235	6.7887	1.02637	4.9548	1.62008	0.715701	1.86909	0.329486	1.94282	0.404345	1.09885	0.181911	1.06968	0.138661		56.7968
158	2000	1164	56.2039	47.6041	0.520752	19.8035	1.4745	5.73357	0.163656	8.13844	12.8906	1.69771	0.176209	0.0177924	1.77924	7.84513		41.072	51.0735	0.303114	1.00634	0.821023	5.15097	0.843287	2.48982	54.8518	375.608	0.0708821	0.283112	0.0877042	152.346	10.393	38.0599	2.70725	6.8505	1.03546	4.99716	1.63297	0.721237	1.88322	0.331942	1.95724	0.407365	1.10716	0.183312	1.07808	0.139771		56.2039
159	2000	1163	55.6227	47.6139	0.524901	19.816	1.4801	5.76167	0.165093	8.09185	12.8425	1.7102	0.177997	0.0179783	1.79783	7.88196		41.4193	51.0798	0.30627	1.0158	0.829456	4.93991	0.850589	2.51555	55.3808	375.579	0.0716136	0.285991	0.0885713	153.048	10.4695	38.4372	2.73213	6.91227	1.04455	5.03946	1.64584	0.726758	1.89731	0.33439	1.97161	0.410374	1.11545	0.184709	1.08646	0.140879		55.6227
160	2000	1162	55.0529	47.6238	0.529033	19.8285	1.48566	5.78964	0.16653	8.04541	12.7944	1.72269	0.179787	0.0181643	1.81643	7.91859		41.7662	51.0864	0.309429	1.02526	0.837896	4.73945	0.857884	2.54131	55.9098	375.548	0.0723457	0.288873	0.0894387	153.746	10.5457	38.8147	2.75701	6.974	1.05362	5.0817	1.65867	0.732264	1.91135	0.33683	1.98594	0.413374	1.12372	0.186102	1.09481	0.141984		55.0529
161	2000	1161	54.4942	47.6338	0.533148	19.8408	1.49118	5.81748	0.167965	7.9991	12.7464	1.73517	0.181578	0.0183506	1.83506	7.95505		42.1128	51.0933	0.312591	1.03472	0.846343	4.54897	0.865172	2.56709	56.4389	375.514	0.0730784	0.291756	0.0903065	154.443	10.6217	39.1924	2.78187	7.0357	1.06268	5.12389	1.67148	0.737755	1.92536	0.339262	2.00022	0.416364	1.13196	0.187491	1.10315	0.143086		54.4942
162	2000	1160	53.9462	47.6439	0.537245	19.8531	1.49667	5.8452	0.169399	7.95293	12.6983	1.74764	0.18337	0.018537	1.8537	7.99134		42.4591	51.1006	0.315756	1.04418	0.854796	4.3679	0.872453	2.59289	56.968	375.478	0.0738116	0.294641	0.0911745	155.137	10.6975	39.5702	2.80673	7.09735	1.07174	5.16601	1.68425	0.743232	1.93932	0.341686	2.01445	0.419345	1.14017	0.188876	1.11146	0.144186		53.9462
163	2000	1159	53.4086	47.6541	0.541325	19.8652	1.50212	5.87278	0.170832	7.90691	12.6504	1.76011	0.185163	0.0187236	1.87236	8.02743		42.8051	51.1081	0.318924	1.05364	0.863256	4.19569	0.879727	2.61872	57.497	375.44	0.0745455	0.297528	0.0920428	155.828	10.773	39.9482	2.83158	7.15897	1.08078	5.20808	1.697	0.748694	1.95324	0.344103	2.02864	0.422316	1.14836	0.190256	1.11975	0.145283		53.4086
164	2000	1158	52.8812	47.6643	0.545388	19.8773	1.50754	5.90023	0.172264	7.86103	12.6024	1.77257	0.186957	0.0189103	1.89103	8.06335		43.1508	51.116	0.322094	1.0631	0.871721	4.03183	0.886994	2.64456	58.0261	375.399	0.0752799	0.300416	0.0929114	156.517	10.8483	40.3263	2.85641	7.22054	1.08982	5.25008	1.70971	0.754142	1.96712	0.346512	2.04278	0.425277	1.15652	0.191633	1.12801	0.146377		52.8812
165	2000	1157	52.3637	47.6747	0.549433	19.8893	1.51292	5.92756	0.173694	7.81529	12.5546	1.78502	0.188752	0.0190972	1.90972	8.0991		43.4961	51.1242	0.325267	1.07256	0.880193	3.87585	0.894253	2.67042	58.5552	375.357	0.0760149	0.303306	0.0937802	157.204	10.9233	40.7046	2.88124	7.28208	1.09885	5.29203	1.7224	0.759574	1.98096	0.348913	2.05687	0.428229	1.16466	0.193006	1.13626	0.147469		52.3637
166	2000	1156	51.8558	47.6852	0.553461	19.9011	1.51826	5.95476	0.175123	7.76969	12.5067	1.79747	0.190549	0.0192843	1.92843	8.13466		43.8411	51.1327	0.328442	1.08202	0.88867	3.72731	0.901506	2.6963	59.0843	375.312	0.0767504	0.306198	0.0946493	157.888	10.998	41.0831	2.90605	7.34358	1.10787	5.33392	1.73506	0.764992	1.99476	0.351306	2.07092	0.431171	1.17277	0.194375	1.14448	0.148558		51.8558
167	2000	1155	51.3573	47.6957	0.55747	19.9129	1.52357	5.98184	0.17655	7.72424	12.4589	1.80991	0.192346	0.0194714	1.94714	8.17006		44.1859	51.1415	0.33162	1.09148	0.897152	3.58579	0.908751	2.7222	59.6134	375.264	0.0774864	0.309092	0.0955185	158.571	11.0726	41.4617	2.93085	7.40503	1.11688	5.37574	1.74769	0.770396	2.00851	0.353692	2.08492	0.434103	1.18085	0.19574	1.15268	0.149644		51.3573
168	2000	1154	50.8679	47.7063	0.561462	19.9246	1.52885	6.00878	0.177976	7.67893	12.4111	1.82233	0.194144	0.0196588	1.96588	8.20527		44.5302	51.1506	0.3348	1.10094	0.90564	3.4509	0.915989	2.74812	60.1424	375.215	0.078223	0.311987	0.096388	159.25	11.1468	41.8404	2.95565	7.46644	1.12588	5.41751	1.76029	0.775784	2.02223	0.35607	2.09887	0.437026	1.18891	0.197101	1.16086	0.150727		50.8679
169	2000	1153	50.3874	47.717	0.565436	19.9362	1.53409	6.0356	0.179401	7.63377	12.3634	1.83476	0.195944	0.0198462	1.98462	8.24031		44.8743	51.1601	0.337983	1.1104	0.914133	3.32229	0.923219	2.77406	60.6714	375.163	0.07896	0.314883	0.0972577	159.928	11.2209	42.2192	2.98043	7.52781	1.13488	5.45921	1.77286	0.781159	2.0359	0.358441	2.11278	0.439939	1.19695	0.198458	1.16902	0.151808		50.3874
170	2000	1152	49.9155	47.7278	0.569391	19.9476	1.5393	6.0623	0.180825	7.58875	12.3157	1.84717	0.197744	0.0200339	2.00339	8.27519		45.218	51.1698	0.341168	1.11986	0.922632	3.19961	0.930442	2.80001	61.2003	375.109	0.0796974	0.317781	0.0981275	160.604	11.2947	42.5981	3.00519	7.58914	1.14386	5.50086	1.78539	0.786518	2.04953	0.360803	2.12664	0.442843	1.20496	0.199811	1.17715	0.152886		49.9155
171	2000	1151	49.4521	47.7387	0.573328	19.959	1.54447	6.08887	0.182246	7.54388	12.268	1.85957	0.199545	0.0202216	2.02216	8.30988		45.5614	51.1799	0.344355	1.12931	0.931135	3.08253	0.937657	2.82598	61.7292	375.053	0.0804354	0.32068	0.0989975	161.277	11.3682	42.9772	3.02995	7.65042	1.15283	5.54244	1.7979	0.791863	2.06312	0.363158	2.14045	0.445737	1.21294	0.201159	1.18526	0.153961		49.4521
172	2000	1150	48.9969	47.7497	0.577246	19.9703	1.54962	6.11531	0.183667	7.49915	12.2204	1.87197	0.201347	0.0204094	2.04094	8.34441		45.9044	51.1902	0.347544	1.13877	0.939642	2.97077	0.944865	2.85197	62.258	374.995	0.0811737	0.32358	0.0998675	161.949	11.4415	43.3564	3.05469	7.71165	1.1618	5.58396	1.81038	0.797193	2.07667	0.365505	2.15422	0.448621	1.2209	0.202504	1.19335	0.155034		48.9969
173	2000	1149	48.5497	47.7607	0.581146	19.9815	1.55472	6.14163	0.185086	7.45458	12.1728	1.88435	0.20315	0.0205974	2.05974	8.37875		46.2471	51.2009	0.350735	1.14822	0.948154	2.86404	0.952065	2.87797	62.7867	374.934	0.0819125	0.326481	0.100738	162.618	11.5145	43.7356	3.07942	7.77284	1.17075	5.62542	1.82284	0.802508	2.09017	0.367845	2.16794	0.451496	1.22884	0.203845	1.20142	0.156104		48.5497
174	2000	1148	48.1104	47.7718	0.585027	19.9925	1.5598	6.16782	0.186503	7.41015	12.1253	1.89673	0.204953	0.0207855	2.07855	8.41293		46.5895	51.2118	0.353928	1.15767	0.956671	2.76206	0.959257	2.90399	63.3154	374.871	0.0826517	0.329384	0.101608	163.285	11.5873	44.115	3.10413	7.83398	1.1797	5.66682	1.83526	0.807809	2.10364	0.370177	2.18162	0.454362	1.23674	0.205182	1.20946	0.157171		48.1104
175	2000	1147	47.6787	47.7831	0.588889	20.0035	1.56484	6.19388	0.18792	7.36587	12.0778	1.9091	0.206757	0.0209737	2.09737	8.44693		46.9315	51.2231	0.357123	1.16712	0.965192	2.6646	0.966441	2.93002	63.844	374.806	0.0833913	0.332287	0.102478	163.951	11.6599	44.4944	3.12883	7.89508	1.18863	5.70816	1.84765	0.813096	2.11706	0.372501	2.19525	0.457218	1.24463	0.206514	1.21748	0.158235		47.6787
176	2000	1146	47.2544	47.7944	0.592732	20.0144	1.56985	6.21982	0.189334	7.32175	12.0304	1.92146	0.208562	0.0211621	2.11621	8.48076		47.2732	51.2347	0.36032	1.17657	0.973716	2.57142	0.973617	2.95606	64.3724	374.739	0.0841313	0.335192	0.103349	164.614	11.7322	44.8739	3.15352	7.95612	1.19756	5.74943	1.86001	0.818367	2.13045	0.374818	2.20883	0.460064	1.25249	0.207843	1.22548	0.159297		47.2544
177	2000	1145	46.8373	47.8057	0.596556	20.0252	1.57483	6.24564	0.190747	7.27777	11.983	1.9338	0.210368	0.0213505	2.13505	8.51443		47.6145	51.2466	0.363519	1.18602	0.982244	2.4823	0.980785	2.98212	64.9008	374.67	0.0848716	0.338098	0.104219	165.275	11.8043	45.2535	3.17819	8.01712	1.20647	5.79064	1.87234	0.823624	2.14379	0.377127	2.22237	0.462901	1.26032	0.209168	1.23346	0.160356		46.8373
178	2000	1144	46.4273	47.8172	0.600361	20.0358	1.57978	6.27133	0.192158	7.23394	11.9356	1.94614	0.212174	0.021539	2.1539	8.54792		47.9555	51.2588	0.36672	1.19547	0.990776	2.39704	0.987944	3.00819	65.429	374.598	0.0856123	0.341004	0.10509	165.935	11.8761	45.6331	3.20285	8.07807	1.21538	5.83178	1.88464	0.828866	2.15709	0.379429	2.23586	0.465728	1.26813	0.210488	1.24141	0.161412		46.4273
179	2000	1143	46.0243	47.8288	0.604146	20.0464	1.5847	6.2969	0.193568	7.19026	11.8883	1.95847	0.21398	0.0217277	2.17277	8.58126		48.2961	51.2712	0.369922	1.20491	0.999311	2.31543	0.995096	3.03428	65.9571	374.525	0.0863533	0.343911	0.105961	166.592	11.9477	46.0128	3.22749	8.13897	1.22428	5.87286	1.89691	0.834094	2.17035	0.381722	2.24931	0.468546	1.27591	0.211805	1.24934	0.162465		46.0243
180	2000	1142	45.628	47.8404	0.607912	20.0568	1.58959	6.32234	0.194976	7.14674	11.8411	1.97078	0.215787	0.0219164	2.19164	8.61441		48.6364	51.284	0.373125	1.21435	1.00785	2.23729	1.00224	3.06037	66.485	374.449	0.0870946	0.346819	0.106831	167.248	12.019	46.3926	3.25211	8.19981	1.23316	5.91388	1.90916	0.839307	2.18356	0.384009	2.26271	0.471354	1.28367	0.213118	1.25725	0.163516		45.628
181	2000	1141	45.2382	47.8521	0.611658	20.0672	1.59444	6.34766	0.196383	7.10336	11.7939	1.98309	0.217595	0.0221052	2.21052	8.6474		48.9763	51.2971	0.37633	1.22379	1.01639	2.16245	1.00937	3.08648	67.0128	374.371	0.0878362	0.349728	0.107702	167.902	12.0901	46.7724	3.27672	8.26061	1.24204	5.95483	1.92137	0.844506	2.19674	0.386287	2.27606	0.474153	1.2914	0.214426	1.26514	0.164564		45.2382
182	2000	1140	44.8549	47.8639	0.615385	20.0774	1.59927	6.37286	0.197788	7.06014	11.7467	1.99538	0.219403	0.0222941	2.22941	8.68023		49.3158	51.3105	0.379537	1.23323	1.02494	2.09075	1.0165	3.11259	67.5405	374.291	0.0885781	0.352638	0.108572	168.554	12.161	47.1522	3.30131	8.32135	1.2509	5.99572	1.93355	0.849689	2.20988	0.388558	2.28937	0.476942	1.2991	0.215731	1.273	0.165609		44.8549
183	2000	1139	44.4779	47.8758	0.619091	20.0875	1.60406	6.39793	0.199191	7.01708	11.6997	2.00766	0.221212	0.0224831	2.24831	8.71287		49.655	51.3242	0.382745	1.24267	1.03348	2.02203	1.02362	3.13872	68.068	374.208	0.0893203	0.355547	0.109443	169.205	12.2316	47.5321	3.32589	8.38204	1.25975	6.03654	1.9457	0.854859	2.22297	0.390822	2.30263	0.479722	1.30678	0.217031	1.28085	0.166651		44.4779
184	2000	1138	44.107	47.8877	0.622778	20.0976	1.60883	6.42287	0.200593	6.97416	11.6526	2.01993	0.223021	0.0226721	2.26721	8.74535		49.9937	51.3382	0.385954	1.2521	1.04203	1.95614	1.03073	3.16485	68.5953	374.124	0.0900627	0.358458	0.110313	169.853	12.3019	47.9119	3.35045	8.44267	1.2686	6.0773	1.95782	0.860013	2.23602	0.393078	2.31585	0.482492	1.31444	0.218328	1.28867	0.167691		44.107
185	2000	1137	43.7422	47.8998	0.626445	20.1075	1.61357	6.4477	0.201993	6.9314	11.6056	2.03219	0.22483	0.0228612	2.28612	8.77768		50.3322	51.3525	0.389165	1.26153	1.05058	1.89295	1.03783	3.191	69.1224	374.037	0.0908053	0.361369	0.111183	170.5	12.3721	48.2918	3.37499	8.50325	1.27743	6.11799	1.96992	0.865153	2.24903	0.395326	2.32902	0.485253	1.32207	0.21962	1.29646	0.168728		43.7422
186	2000	1136	43.3831	47.9119	0.630091	20.1173	1.61827	6.47239	0.203391	6.8888	11.5587	2.04444	0.226639	0.0230504	2.30504	8.80981		50.6702	51.367	0.392376	1.27096	1.05914	1.83234	1.04492	3.21715	69.6493	373.948	0.0915482	0.36428	0.112053	171.145	12.4419	48.6717	3.39952	8.56377	1.28625	6.15862	1.98198	0.870278	2.26201	0.397567	2.34215	0.488005	1.32968	0.220909	1.30424	0.169762		43.3831
187	2000	1135	43.0298	47.9241	0.633717	20.127	1.62295	6.49697	0.204787	6.84635	11.5118	2.05667	0.228449	0.0232397	2.32397	8.84181		51.0078	51.3819	0.395589	1.28038	1.0677	1.77416	1.052	3.24331	70.176	373.858	0.0922913	0.367192	0.112923	171.789	12.5116	49.0516	3.42402	8.62424	1.29506	6.19918	1.99401	0.875389	2.27494	0.3998	2.35523	0.490747	1.33726	0.222193	1.31199	0.170793		43.0298
188	2000	1134	42.6821	47.9364	0.637322	20.1366	1.6276	6.52142	0.206182	6.80406	11.465	2.06889	0.230259	0.023429	2.3429	8.87362		51.3451	51.3971	0.398803	1.2898	1.07625	1.71832	1.05907	3.26948	70.7025	373.765	0.0930345	0.370104	0.113793	172.431	12.581	49.4316	3.44851	8.68465	1.30386	6.23967	2.00601	0.880485	2.28783	0.402025	2.36827	0.493479	1.34481	0.223474	1.31971	0.171821		42.6821
189	2000	1133	42.3399	47.9487	0.640907	20.1461	1.63223	6.54575	0.207574	6.76192	11.4182	2.0811	0.232069	0.0236184	2.36184	8.90529		51.682	51.4126	0.402017	1.29922	1.08481	1.6647	1.06614	3.29565	71.2288	373.67	0.093778	0.373016	0.114663	173.071	12.6501	49.8114	3.47298	8.745	1.31265	6.2801	2.01799	0.885566	2.30067	0.404243	2.38126	0.496202	1.35234	0.22475	1.32742	0.172847		42.3399
190	2000	1132	42.003	47.9612	0.644471	20.1555	1.63682	6.56995	0.208965	6.71994	11.3715	2.09329	0.23388	0.0238078	2.38078	8.93676		52.0185	51.4283	0.405233	1.30863	1.09337	1.61319	1.07319	3.32183	71.7549	373.573	0.0945216	0.375929	0.115533	173.71	12.7191	50.1913	3.49743	8.80529	1.32143	6.32046	2.02993	0.890633	2.31348	0.406454	2.3942	0.498916	1.35985	0.226022	1.3351	0.17387		42.003
191	2000	1131	41.6714	47.9737	0.648014	20.1647	1.64138	6.59403	0.210354	6.67811	11.3248	2.10548	0.23569	0.0239973	2.39973	8.96808		52.3546	51.4444	0.408449	1.31805	1.10194	1.5637	1.08024	3.34802	72.2807	373.473	0.0952653	0.378841	0.116402	174.347	12.7877	50.5712	3.52186	8.86553	1.33019	6.36075	2.04184	0.895686	2.32625	0.408657	2.4071	0.50162	1.36733	0.227291	1.34276	0.17489		41.6714
192	2000	1130	41.3449	47.9863	0.651536	20.1739	1.64592	6.61799	0.211742	6.63645	11.2782	2.11764	0.237501	0.0241868	2.41868	8.99924		52.6903	51.4607	0.411666	1.32745	1.1105	1.51614	1.08727	3.37421	72.8063	373.372	0.0960092	0.381754	0.117271	174.983	12.8562	50.951	3.54627	8.9257	1.33895	6.40097	2.05372	0.900723	2.33897	0.410853	2.41995	0.504315	1.37478	0.228555	1.3504	0.175907		41.3449
193	2000	1129	41.0233	47.9989	0.655038	20.1829	1.65043	6.64183	0.213127	6.59494	11.2317	2.1298	0.239312	0.0243764	2.43764	9.03024		53.0256	51.4774	0.414884	1.33686	1.11906	1.47041	1.0943	3.4004	73.3316	373.269	0.0967532	0.384667	0.11814	175.617	12.9244	51.3308	3.57066	8.98581	1.34769	6.44113	2.06557	0.905746	2.35166	0.413041	2.43276	0.507	1.38221	0.229815	1.35802	0.176921		41.0233
194	2000	1128	40.7067	48.0117	0.658518	20.1918	1.65492	6.66554	0.21451	6.55358	11.1852	2.14193	0.241122	0.024566	2.4566	9.06108		53.3605	51.4943	0.418102	1.34626	1.12763	1.42643	1.10132	3.4266	73.8566	373.163	0.0974973	0.387579	0.119009	176.249	12.9923	51.7105	3.59503	9.04587	1.35643	6.48122	2.0774	0.910755	2.3643	0.415221	2.44553	0.509676	1.38962	0.231072	1.36561	0.177933		40.7067
195	2000	1127	40.3949	48.0245	0.661977	20.2007	1.65938	6.68912	0.215892	6.51239	11.1388	2.15406	0.242933	0.0247556	2.47556	9.09174		53.6949	51.5116	0.421321	1.35566	1.1362	1.38413	1.10833	3.4528	74.3814	373.056	0.0982415	0.390492	0.119878	176.88	13.06	52.0902	3.61938	9.10585	1.36515	6.52124	2.08919	0.915749	2.37691	0.417394	2.45825	0.512343	1.397	0.232324	1.37318	0.178942		40.3949
196	2000	1126	40.0878	48.0374	0.665414	20.2094	1.66381	6.71259	0.217271	6.47135	11.0924	2.16617	0.244743	0.0249453	2.49453	9.12224		54.029	51.5291	0.424541	1.36505	1.14476	1.34343	1.11532	3.47901	74.9059	372.946	0.0989857	0.393404	0.120746	177.51	13.1275	52.4698	3.64371	9.16578	1.37386	6.56119	2.10095	0.920728	2.38947	0.41956	2.47092	0.515	1.40435	0.233572	1.38072	0.179948		40.0878
197	2000	1125	39.7853	48.0503	0.66883	20.218	1.66821	6.73593	0.218649	6.43048	11.0461	2.17826	0.246554	0.0251349	2.51349	9.15258		54.3627	51.5469	0.427761	1.37444	1.15333	1.30425	1.12231	3.50522	75.4301	372.835	0.09973	0.396316	0.121614	178.138	13.1947	52.8494	3.66801	9.22564	1.38255	6.60107	2.11268	0.925693	2.40199	0.421718	2.48355	0.517649	1.41168	0.234816	1.38825	0.180951		39.7853
198	2000	1124	39.4872	48.0634	0.672224	20.2265	1.67259	6.75914	0.220024	6.38976	10.9999	2.19034	0.248364	0.0253246	2.53246	9.18275		54.6959	51.565	0.430981	1.38382	1.1619	1.26654	1.12929	3.53143	75.954	372.721	0.100474	0.399228	0.122481	178.765	13.2617	53.2289	3.6923	9.28544	1.39124	6.64088	2.12438	0.930643	2.41447	0.423868	2.49613	0.520287	1.41899	0.236057	1.39575	0.181951		39.4872
199	2000	1123	39.1936	48.0765	0.675597	20.2348	1.67694	6.78224	0.221398	6.3492	10.9538	2.20241	0.250174	0.0255144	2.55144	9.21276		55.0287	51.5834	0.434201	1.3932	1.17046	1.23022	1.13626	3.55764	76.4776	372.605	0.101219	0.402139	0.123349	179.39	13.3285	53.6083	3.71656	9.34517	1.39991	6.68062	2.13605	0.935578	2.42692	0.426012	2.50867	0.522917	1.42627	0.237293	1.40323	0.182949		39.1936
200	2000	1122	38.9043	48.0897	0.678947	20.2431	1.68127	6.80521	0.222769	6.3088	10.9077	2.21446	0.251984	0.0257041	2.57041	9.24261		55.3611	51.6021	0.437422	1.40258	1.17903	1.19523	1.14322	3.58385	77.0009	372.488	0.101963	0.40505	0.124216	180.014	13.395	53.9877	3.7408	9.40484	1.40858	6.72029	2.14769	0.9405	2.43932	0.428147	2.52117	0.525537	1.43352	0.238525	1.41068	0.183943		38.9043
201	2000	1121	38.6192	48.103	0.682276	20.2513	1.68557	6.82805	0.224138	6.26856	10.8616	2.22649	0.253794	0.0258938	2.58938	9.27229		55.6931	51.6211	0.440643	1.41195	1.1876	1.16152	1.15017	3.61006	77.5238	372.368	0.102707	0.407961	0.125082	180.637	13.4613	54.3669	3.76502	9.46444	1.41723	6.7599	2.1593	0.945406	2.45168	0.430276	2.53362	0.528147	1.44075	0.239753	1.41812	0.184935		38.6192
202	2000	1120	38.3383	48.1163	0.685583	20.2593	1.68985	6.85078	0.225505	6.22849	10.8157	2.2385	0.255603	0.0260836	2.60836	9.30183		56.0247	51.6404	0.443864	1.42131	1.19616	1.12903	1.1571	3.63627	78.0464	372.246	0.103452	0.410871	0.125949	181.258	13.5273	54.7461	3.78921	9.52398	1.42586	6.79943	2.17088	0.950298	2.464	0.432397	2.54602	0.530749	1.44796	0.240977	1.42553	0.185924		38.3383
203	2000	1119	38.0614	48.1297	0.688867	20.2672	1.6941	6.87337	0.226871	6.18857	10.7698	2.2505	0.257413	0.0262733	2.62733	9.33118		56.3558	51.6599	0.447084	1.43067	1.20473	1.09771	1.16403	3.66248	78.5687	372.123	0.104196	0.41378	0.126815	181.878	13.5931	55.1251	3.81339	9.58344	1.43449	6.83889	2.18243	0.955176	2.47628	0.434511	2.55838	0.533341	1.45514	0.242198	1.43292	0.186911		38.0614
204	2000	1118	37.7885	48.1432	0.69213	20.275	1.69832	6.89585	0.228233	6.14881	10.724	2.26249	0.259221	0.0264631	2.64631	9.36038		56.6864	51.6798	0.450305	1.44003	1.21329	1.06751	1.17095	3.68869	79.0906	371.997	0.10494	0.416689	0.12768	182.497	13.6587	55.5041	3.83753	9.64284	1.4431	6.87828	2.19395	0.960039	2.48852	0.436617	2.5707	0.535924	1.4623	0.243414	1.44028	0.187894		37.7885
205	2000	1117	37.5195	48.1567	0.695369	20.2827	1.70252	6.9182	0.229594	6.10921	10.6782	2.27445	0.26103	0.0266528	2.66528	9.38941		57.0167	51.6999	0.453526	1.44938	1.22185	1.03838	1.17785	3.7149	79.6122	371.87	0.105685	0.419597	0.128545	183.115	13.7241	55.8829	3.86166	9.70217	1.4517	6.9176	2.20544	0.964888	2.50072	0.438716	2.58297	0.538498	1.46943	0.244626	1.44762	0.188875		37.5195
206	2000	1116	37.2543	48.1704	0.698587	20.2903	1.7067	6.94043	0.230953	6.06978	10.6325	2.2864	0.262838	0.0268426	2.68426	9.41829		57.3465	51.7203	0.456747	1.45873	1.23042	1.01028	1.18475	3.74111	80.1334	371.74	0.106429	0.422505	0.12941	183.731	13.7892	56.2617	3.88576	9.76143	1.46029	6.95685	2.2169	0.969722	2.51288	0.440807	2.5952	0.541063	1.47653	0.245834	1.45494	0.189852		37.2543
207	2000	1115	36.9928	48.1841	0.701782	20.2978	1.71085	6.96254	0.232309	6.0305	10.5869	2.29833	0.264645	0.0270323	2.70323	9.44701		57.6758	51.7411	0.459967	1.46807	1.23898	0.983161	1.19164	3.76731	80.6542	371.609	0.107173	0.425411	0.130274	184.346	13.854	56.6403	3.90983	9.82062	1.46887	6.99603	2.22833	0.974542	2.525	0.442892	2.60739	0.543618	1.48362	0.247038	1.46224	0.190827		36.9928
208	2000	1114	36.735	48.1978	0.704954	20.3051	1.71498	6.98452	0.233663	5.99139	10.5414	2.31025	0.266452	0.027222	2.7222	9.47556		58.0047	51.7621	0.463187	1.4774	1.24753	0.956987	1.19851	3.79351	81.1747	371.475	0.107917	0.428317	0.131138	184.96	13.9187	57.0187	3.93389	9.87974	1.47743	7.03513	2.23973	0.979348	2.53708	0.444968	2.61953	0.546164	1.49067	0.248239	1.46952	0.191799		36.735
209	2000	1113	36.4808	48.2117	0.708103	20.3124	1.71909	7.00638	0.235015	5.95244	10.4959	2.32214	0.268259	0.0274117	2.74117	9.50396		58.3332	51.7834	0.466407	1.48673	1.25609	0.931716	1.20538	3.81971	81.6947	371.34	0.108661	0.431222	0.132002	185.572	13.9831	57.3971	3.95791	9.93879	1.48598	7.07417	2.2511	0.984139	2.54912	0.447038	2.63163	0.548702	1.49771	0.249435	1.47677	0.192769		36.4808
210	2000	1112	36.2301	48.2256	0.71123	20.3195	1.72317	7.02811	0.236364	5.91365	10.4505	2.33402	0.270065	0.0276013	2.76013	9.53218		58.6611	51.8049	0.469626	1.49606	1.26465	0.907312	1.21223	3.8459	82.2144	371.202	0.109404	0.434126	0.132864	186.184	14.0472	57.7752	3.98191	9.99776	1.49452	7.11313	2.26244	0.988916	2.56112	0.449101	2.64368	0.55123	1.50471	0.250627	1.484	0.193735		36.2301
211	2000	1111	35.9829	48.2396	0.714333	20.3265	1.72723	7.04972	0.237711	5.87502	10.4052	2.34588	0.27187	0.027791	2.7791	9.56025		58.9887	51.8268	0.472845	1.50538	1.2732	0.883741	1.21907	3.87209	82.7336	371.063	0.110148	0.437029	0.133727	186.794	14.1112	58.1533	4.00589	10.0567	1.50305	7.15202	2.27375	0.993678	2.57308	0.451156	2.65569	0.553749	1.5117	0.251816	1.4912	0.194699		35.9829
212	2000	1110	35.7391	48.2536	0.717414	20.3334	1.73126	7.07121	0.239056	5.83656	10.36	2.35772	0.273675	0.0279806	2.79806	9.58816		59.3158	51.849	0.476064	1.51469	1.28175	0.860967	1.2259	3.89827	83.2525	370.922	0.110891	0.439931	0.134589	187.403	14.1749	58.5312	4.02984	10.1155	1.51156	7.19084	2.28503	0.998426	2.58501	0.453204	2.66765	0.556258	1.51866	0.253	1.49839	0.19566		35.7391
213	2000	1109	35.4986	48.2678	0.720471	20.3402	1.73528	7.09257	0.240399	5.79825	10.3148	2.36954	0.275479	0.0281701	2.81701	9.61591		59.6424	51.8714	0.479281	1.524	1.2903	0.83896	1.23272	3.92445	83.7709	370.779	0.111635	0.442832	0.13545	188.011	14.2384	58.9089	4.05376	10.1743	1.52006	7.22958	2.29628	1.00316	2.59689	0.455244	2.67958	0.558759	1.52559	0.254181	1.50555	0.196618		35.4986
214	2000	1108	35.2613	48.2819	0.723505	20.3469	1.73927	7.11381	0.241739	5.76011	10.2698	2.38134	0.277283	0.0283597	2.83597	9.6435		59.9685	51.8941	0.482498	1.5333	1.29885	0.817688	1.23953	3.95062	84.2889	370.634	0.112378	0.445732	0.136311	188.618	14.3016	59.2865	4.07766	10.2329	1.52855	7.26825	2.3075	1.00788	2.60873	0.457278	2.69146	0.561251	1.5325	0.255357	1.51269	0.197573		35.2613
215	2000	1107	35.0273	48.2962	0.726515	20.3535	1.74323	7.13492	0.243076	5.72213	10.2248	2.39313	0.279085	0.0285492	2.85492	9.67092		60.2942	51.9172	0.485715	1.54259	1.30739	0.797123	1.24633	3.97678	84.8065	370.488	0.113121	0.44863	0.137171	189.224	14.3646	59.6639	4.10153	10.2915	1.53702	7.30685	2.31869	1.01259	2.62054	0.459304	2.70329	0.563734	1.53939	0.25653	1.51981	0.198525		35.0273
216	2000	1106	34.7964	48.3105	0.729503	20.3599	1.74718	7.15591	0.244412	5.68431	10.1798	2.40489	0.280887	0.0287386	2.87386	9.69819		60.6194	51.9405	0.488931	1.55188	1.31594	0.777235	1.25312	4.00294	85.3236	370.339	0.113863	0.451528	0.138031	189.828	14.4274	60.0411	4.12537	10.3501	1.54548	7.34538	2.32984	1.01728	2.6323	0.461323	2.71509	0.566208	1.54625	0.257699	1.5269	0.199475		34.7964
217	2000	1105	34.5686	48.3249	0.732466	20.3663	1.7511	7.17678	0.245744	5.64665	10.135	2.41664	0.282689	0.028928	2.8928	9.7253		60.9441	51.964	0.492146	1.56116	1.32447	0.758	1.2599	4.02909	85.8403	370.189	0.114606	0.454424	0.13889	190.432	14.49	60.4181	4.14919	10.4085	1.55393	7.38384	2.34097	1.02195	2.64403	0.463335	2.72684	0.568673	1.55309	0.258864	1.53397	0.200422		34.5686
218	2000	1104	34.3438	48.3394	0.735406	20.3725	1.755	7.19752	0.247075	5.60916	10.0902	2.42836	0.284489	0.0291174	2.91174	9.75224		61.2684	51.9879	0.49536	1.57044	1.33301	0.73939	1.26666	4.05523	86.3565	370.036	0.115348	0.457318	0.139749	191.035	14.5523	60.795	4.17297	10.4669	1.56237	7.42222	2.35207	1.02662	2.65571	0.46534	2.73855	0.571128	1.55991	0.260025	1.54102	0.201366		34.3438
219	2000	1103	34.1219	48.3539	0.738322	20.3786	1.75888	7.21814	0.248402	5.57182	10.0456	2.44007	0.286289	0.0293067	2.93067	9.77904		61.5922	52.0121	0.498573	1.57971	1.34154	0.721383	1.27341	4.08137	86.8723	369.882	0.11609	0.460212	0.140607	191.636	14.6144	61.1716	4.19674	10.5252	1.57079	7.46053	2.36314	1.03127	2.66736	0.467338	2.75021	0.573576	1.5667	0.261182	1.54805	0.202307		34.1219
220	2000	1102	33.903	48.3685	0.741214	20.3846	1.76274	7.23863	0.249728	5.53465	10.001	2.45175	0.288088	0.0294959	2.94959	9.80566		61.9155	52.0365	0.501785	1.58897	1.35007	0.703955	1.28015	4.10749	87.3876	369.726	0.116832	0.463104	0.141464	192.237	14.6763	61.5481	4.22047	10.5834	1.5792	7.49876	2.37419	1.0359	2.67897	0.469329	2.76183	0.576014	1.57346	0.262335	1.55506	0.203246		33.903
221	2000	1101	33.687	48.3832	0.744082	20.3905	1.76658	7.259	0.25105	5.49764	9.95646	2.46341	0.289885	0.0296851	2.96851	9.83214		62.2383	52.0613	0.504996	1.59823	1.3586	0.687083	1.28688	4.13361	87.9024	369.568	0.117573	0.465994	0.142321	192.836	14.7379	61.9243	4.24417	10.6416	1.58759	7.53693	2.3852	1.04052	2.69054	0.471313	2.77341	0.578443	1.58021	0.263484	1.56204	0.204181		33.687
222	2000	1100	33.4737	48.3979	0.746927	20.3963	1.77039	7.27925	0.25237	5.4608	9.91204	2.47505	0.291682	0.0298742	2.98742	9.85845		62.5606	52.0863	0.508206	1.60748	1.36712	0.670746	1.2936	4.15972	88.4168	369.409	0.118314	0.468883	0.143177	193.435	14.7993	62.3004	4.26785	10.6997	1.59597	7.57502	2.39618	1.04513	2.70208	0.47329	2.78495	0.580864	1.58693	0.26463	1.569	0.205114		33.4737
223	2000	1099	33.2632	48.4127	0.749747	20.4019	1.77419	7.29937	0.253688	5.42411	9.8677	2.48668	0.293478	0.0300633	3.00633	9.8846		62.8825	52.1116	0.511415	1.61672	1.37564	0.654925	1.30031	4.18581	88.9306	369.248	0.119055	0.471771	0.144032	194.033	14.8605	62.6762	4.2915	10.7577	1.60434	7.61303	2.40713	1.04972	2.71357	0.47526	2.79645	0.583275	1.59362	0.265771	1.57594	0.206044		33.2632
224	2000	1098	33.0554	48.4276	0.752542	20.4075	1.77796	7.31936	0.255003	5.38759	9.82345	2.49828	0.295274	0.0302522	3.02522	9.91058		63.2038	52.1371	0.514623	1.62596	1.38416	0.639599	1.307	4.2119	89.444	369.084	0.119796	0.474656	0.144887	194.63	14.9215	63.0519	4.31512	10.8156	1.6127	7.65098	2.41805	1.0543	2.72503	0.477223	2.8079	0.585679	1.60029	0.266909	1.58286	0.206972		33.0554
225	2000	1097	32.8503	48.4425	0.755314	20.4129	1.78171	7.33923	0.256315	5.35123	9.77928	2.50986	0.297068	0.0304411	3.04411	9.93641		63.5247	52.163	0.517829	1.63519	1.39267	0.624751	1.31369	4.23798	89.9569	368.92	0.120536	0.477541	0.145741	195.226	14.9823	63.4273	4.33871	10.8734	1.62104	7.68885	2.42895	1.05887	2.73645	0.479179	2.81932	0.588073	1.60694	0.268043	1.58976	0.207896		32.8503
226	2000	1096	32.6478	48.4575	0.758061	20.4182	1.78544	7.35898	0.257625	5.31503	9.73521	2.52141	0.298861	0.03063	3.063	9.96208		63.8451	52.1892	0.521034	1.64441	1.40118	0.610362	1.32036	4.26404	90.4693	368.753	0.121276	0.480423	0.146594	195.821	15.0428	63.8025	4.36227	10.9312	1.62937	7.72664	2.43981	1.06342	2.74783	0.481128	2.83069	0.590459	1.61357	0.269173	1.59663	0.208818		32.6478
227	2000	1095	32.4478	48.4726	0.760783	20.4234	1.78916	7.3786	0.258932	5.27899	9.69122	2.53295	0.300653	0.0308187	3.08187	9.9876		64.165	52.2156	0.524238	1.65362	1.40968	0.596415	1.32702	4.29009	90.9811	368.585	0.122016	0.483304	0.147447	196.415	15.1031	64.1774	4.38581	10.9888	1.63769	7.76437	2.45064	1.06796	2.75917	0.48307	2.84202	0.592836	1.62017	0.270299	1.60348	0.209737		32.4478
228	2000	1094	32.2503	48.4877	0.763481	20.4285	1.79285	7.3981	0.260236	5.24311	9.64732	2.54446	0.302444	0.0310074	3.10074	10.013		64.4843	52.2423	0.527441	1.66283	1.41818	0.582894	1.33366	4.31614	91.4925	368.414	0.122755	0.486183	0.148299	197.008	15.1632	64.5522	4.40931	11.0464	1.64599	7.80202	2.46145	1.07248	2.77047	0.485005	2.85331	0.595204	1.62675	0.271422	1.61031	0.210653		32.2503
229	2000	1093	32.0554	48.5029	0.766154	20.4335	1.79652	7.41747	0.261537	5.2074	9.60351	2.55595	0.304233	0.031196	3.1196	10.0382		64.8032	52.2693	0.530642	1.67203	1.42667	0.569785	1.3403	4.34217	92.0033	368.243	0.123494	0.48906	0.14915	197.6	15.2231	64.9266	4.43278	11.104	1.65428	7.83959	2.47223	1.07699	2.78174	0.486934	2.86456	0.597564	1.6333	0.272541	1.61712	0.211567		32.0554
230	2000	1092	31.8628	48.5182	0.768802	20.4384	1.80017	7.43671	0.262836	5.17184	9.55979	2.56742	0.306022	0.0313845	3.13845	10.0632		65.1216	52.2966	0.533842	1.68122	1.43516	0.55707	1.34692	4.36818	92.5136	368.069	0.124233	0.491936	0.150001	198.192	15.2828	65.3009	4.45623	11.1614	1.66255	7.8771	2.48298	1.08149	2.79297	0.488856	2.87577	0.599916	1.63984	0.273656	1.62391	0.212478		31.8628
231	2000	1091	31.6727	48.5335	0.771426	20.4432	1.8038	7.45583	0.264132	5.13645	9.51616	2.57887	0.30781	0.0315729	3.15729	10.0881		65.4394	52.3242	0.53704	1.69041	1.44365	0.544737	1.35353	4.39419	93.0234	367.894	0.124971	0.494809	0.150851	198.783	15.3422	65.6749	4.47964	11.2188	1.67081	7.91453	2.49369	1.08597	2.80417	0.490771	2.88693	0.602259	1.64635	0.274767	1.63067	0.213386		31.6727
232	2000	1090	31.4849	48.5489	0.774024	20.4478	1.80741	7.47483	0.265425	5.10122	9.47263	2.59029	0.309596	0.0317613	3.17613	10.1128		65.7568	52.352	0.540236	1.69959	1.45213	0.532772	1.36013	4.42018	93.5326	367.717	0.125709	0.497681	0.1517	199.373	15.4014	66.0486	4.50302	11.276	1.67906	7.95188	2.50438	1.09044	2.81533	0.492679	2.89806	0.604593	1.65283	0.275875	1.63742	0.214291		31.4849
233	2000	1089	31.2994	48.5643	0.776597	20.4523	1.81101	7.49369	0.266715	5.06614	9.42918	2.60169	0.311381	0.0319495	3.19495	10.1373		66.0737	52.3802	0.543431	1.70876	1.46061	0.521161	1.36672	4.44616	94.0413	367.538	0.126446	0.50055	0.152548	199.962	15.4604	66.4221	4.52638	11.3332	1.68729	7.98917	2.51505	1.0949	2.82645	0.494581	2.90915	0.606919	1.6593	0.276979	1.64414	0.215194		31.2994
234	2000	1088	31.1162	48.5799	0.779145	20.4568	1.81458	7.51244	0.268002	5.03123	9.38583	2.61307	0.313165	0.0321376	3.21376	10.1617		66.39	52.4086	0.546625	1.71792	1.46908	0.509892	1.3733	4.47212	94.5495	367.358	0.127183	0.503418	0.153396	200.55	15.5192	66.7953	4.5497	11.3903	1.69552	8.02638	2.52568	1.09934	2.83753	0.496476	2.9202	0.609237	1.66574	0.278079	1.65084	0.216094		31.1162
235	2000	1087	30.9352	48.5954	0.781668	20.4611	1.81813	7.53105	0.269287	4.99648	9.34258	2.62443	0.314948	0.0323257	3.23257	10.186		66.7059	52.4373	0.549816	1.72707	1.47754	0.498952	1.37986	4.49807	95.0571	367.176	0.12792	0.506284	0.154242	201.138	15.5778	67.1683	4.57299	11.4474	1.70372	8.06351	2.53628	1.10377	2.84858	0.498364	2.9312	0.611547	1.67216	0.279176	1.65752	0.216992		30.9352
236	2000	1086	30.7564	48.6111	0.784165	20.4653	1.82167	7.54955	0.270569	4.96189	9.29942	2.63576	0.316729	0.0325136	3.25136	10.2101		67.0212	52.4663	0.553006	1.73622	1.486	0.488331	1.38641	4.524	95.5641	366.993	0.128656	0.509147	0.155088	201.725	15.6362	67.541	4.59625	11.5043	1.71192	8.10058	2.54686	1.10819	2.85959	0.500246	2.94217	0.613848	1.67856	0.280268	1.66418	0.217886		30.7564
237	2000	1085	30.5797	48.6268	0.786636	20.4694	1.82519	7.56791	0.271847	4.92745	9.25635	2.64707	0.318509	0.0327014	3.27014	10.234		67.336	52.4956	0.556195	1.74536	1.49446	0.478017	1.39295	4.54992	96.0706	366.807	0.129392	0.512009	0.155933	202.311	15.6944	67.9135	4.61948	11.5612	1.7201	8.13757	2.55741	1.11259	2.87057	0.502121	2.9531	0.616141	1.68493	0.281358	1.67082	0.218779		30.5797
238	2000	1084	30.4051	48.6426	0.789082	20.4734	1.82868	7.58615	0.273123	4.89318	9.21339	2.65835	0.320288	0.0328892	3.28892	10.2577		67.6503	52.5251	0.559381	1.75449	1.50291	0.467999	1.39947	4.57583	96.5765	366.621	0.130127	0.514868	0.156778	202.897	15.7524	68.2856	4.64268	11.6179	1.72826	8.17449	2.56793	1.11698	2.88151	0.50399	2.96399	0.618426	1.69128	0.282443	1.67743	0.219668		30.4051
239	2000	1083	30.2327	48.6584	0.791502	20.4773	1.83216	7.60426	0.274396	4.85906	9.17051	2.66961	0.322065	0.0330768	3.30768	10.2813		67.9641	52.5549	0.562566	1.76361	1.51136	0.458267	1.40599	4.60172	97.0819	366.432	0.130862	0.517725	0.157621	203.482	15.8101	68.6575	4.66585	11.6746	1.73642	8.21134	2.57842	1.12136	2.89241	0.505853	2.97484	0.620703	1.69761	0.283525	1.68403	0.220555		30.2327
240	2000	1082	30.0623	48.6743	0.793897	20.481	1.83562	7.62225	0.275666	4.82511	9.12774	2.68085	0.323841	0.0332643	3.32643	10.3048		68.2774	52.585	0.565748	1.77273	1.5198	0.448811	1.41249	4.62759	97.5867	366.242	0.131596	0.52058	0.158464	204.066	15.8677	69.0291	4.68899	11.7313	1.74455	8.24811	2.58889	1.12572	2.90328	0.507709	2.98565	0.622971	1.70392	0.284604	1.69061	0.221439		30.0623
241	2000	1081	29.8938	48.6902	0.796265	20.4847	1.83907	7.64011	0.276933	4.79131	9.08506	2.69206	0.325616	0.0334517	3.34517	10.3281		68.5901	52.6154	0.568929	1.78184	1.52823	0.439623	1.41897	4.65344	98.0909	366.051	0.13233	0.523433	0.159306	204.65	15.925	69.4004	4.71209	11.7878	1.75268	8.28482	2.59932	1.13007	2.91411	0.509558	2.99643	0.625232	1.71021	0.285679	1.69716	0.222321		29.8938
242	2000	1080	29.7274	48.7063	0.798607	20.4883	1.84249	7.65785	0.278197	4.75767	9.04248	2.70325	0.327389	0.033639	3.3639	10.3512		68.9024	52.6461	0.572108	1.79094	1.53666	0.430692	1.42545	4.67929	98.5945	365.858	0.133064	0.526284	0.160147	205.232	15.9822	69.7715	4.73517	11.8442	1.76079	8.32145	2.60973	1.13441	2.92491	0.511402	3.00717	0.627485	1.71647	0.28675	1.7037	0.223199		29.7274
243	2000	1079	29.5629	48.7223	0.800923	20.4917	1.8459	7.67545	0.279458	4.72419	9	2.71441	0.329161	0.0338261	3.38261	10.3742		69.2141	52.6771	0.575285	1.80003	1.54508	0.422009	1.43191	4.70511	99.0976	365.663	0.133797	0.529132	0.160987	205.815	16.0391	70.1422	4.75821	11.9006	1.76889	8.35801	2.62011	1.13874	2.93568	0.513239	3.01786	0.62973	1.72272	0.287818	1.71021	0.224076		29.5629
244	2000	1078	29.4004	48.7385	0.803212	20.4951	1.84929	7.69293	0.280715	4.69087	8.95763	2.72555	0.330932	0.0340132	3.40132	10.397		69.5253	52.7083	0.57846	1.80911	1.5535	0.413568	1.43836	4.73092	99.6001	365.467	0.134529	0.531978	0.161826	206.397	16.0958	70.5127	4.78122	11.9569	1.77698	8.39449	2.63047	1.14305	2.94641	0.515069	3.02853	0.631967	1.72894	0.288882	1.71671	0.22495		29.4004
245	2000	1077	29.2397	48.7547	0.805475	20.4983	1.85266	7.71028	0.28197	4.6577	8.91535	2.73666	0.332701	0.0342001	3.42001	10.4196		69.836	52.7398	0.581632	1.81819	1.56191	0.405359	1.4448	4.75671	100.102	365.269	0.135262	0.534821	0.162665	206.978	16.1524	70.8829	4.8042	12.0131	1.78505	8.43091	2.6408	1.14735	2.9571	0.516894	3.03915	0.634196	1.73514	0.289943	1.72318	0.225821		29.2397
246	2000	1076	29.0808	48.771	0.807712	20.5014	1.85601	7.72751	0.283222	4.62469	8.87317	2.74775	0.334468	0.0343869	3.43869	10.4421		70.1461	52.7716	0.584803	1.82725	1.57031	0.397375	1.45123	4.78248	100.603	365.07	0.135993	0.537663	0.163502	207.558	16.2087	71.2527	4.82715	12.0692	1.7931	8.46725	2.6511	1.15164	2.96777	0.518712	3.04974	0.636417	1.74132	0.291001	1.72963	0.22669		29.0808
247	2000	1075	28.9238	48.7873	0.809921	20.5044	1.85935	7.74461	0.28447	4.59184	8.83109	2.75881	0.336234	0.0345736	3.45736	10.4645		70.4558	52.8037	0.587972	1.83631	1.57871	0.389608	1.45764	4.80823	101.104	364.869	0.136724	0.540502	0.164339	208.138	16.2649	71.6223	4.85006	12.1252	1.80115	8.50353	2.66137	1.15591	2.97839	0.520525	3.06029	0.638631	1.74748	0.292055	1.73607	0.227556		28.9238
248	2000	1074	28.7686	48.8037	0.812104	20.5074	1.86267	7.76158	0.285715	4.55914	8.78911	2.76985	0.337999	0.0347602	3.47602	10.4866		70.7649	52.8361	0.591138	1.84536	1.5871	0.382051	1.46404	4.83397	101.604	364.667	0.137455	0.543338	0.165175	208.718	16.3208	71.9916	4.87294	12.1812	1.80918	8.53973	2.67162	1.16018	2.98899	0.522331	3.0708	0.640837	1.75362	0.293106	1.74248	0.22842		28.7686
249	2000	1073	28.6151	48.8202	0.81426	20.5102	1.86597	7.77842	0.286957	4.5266	8.74724	2.78086	0.339762	0.0349466	3.49466	10.5087		71.0735	52.8687	0.594302	1.8544	1.59549	0.374697	1.47043	4.85969	102.104	364.463	0.138185	0.546172	0.16601	209.297	16.3766	72.3605	4.8958	12.237	1.8172	8.57586	2.68184	1.16443	2.99955	0.524131	3.08128	0.643036	1.75974	0.294153	1.74888	0.229281		28.6151
250	2000	1072	28.4634	48.8367	0.816388	20.5129	1.86925	7.79514	0.288196	4.49421	8.70547	2.79185	0.341523	0.0351329	3.51329	10.5305		71.3816	52.9017	0.597464	1.86344	1.60387	0.36754	1.47681	4.88539	102.602	364.258	0.138914	0.549004	0.166844	209.875	16.4322	72.7292	4.91862	12.2928	1.8252	8.61192	2.69203	1.16867	3.01008	0.525925	3.09172	0.645227	1.76584	0.295197	1.75525	0.23014		28.4634
251	2000	1071	28.3133	48.8533	0.81849	20.5155	1.87252	7.81172	0.289432	4.46198	8.6638	2.80281	0.343283	0.0353191	3.53191	10.5522		71.6891	52.9349	0.600624	1.87246	1.61224	0.360573	1.48317	4.91107	103.101	364.052	0.139643	0.551833	0.167677	210.453	16.4876	73.0975	4.9414	12.3485	1.83319	8.64792	2.7022	1.17289	3.02057	0.527714	3.10213	0.64741	1.77192	0.296237	1.76161	0.230996		28.3133
252	2000	1070	28.165	48.8699	0.820563	20.518	1.87577	7.82818	0.290665	4.4299	8.62224	2.81375	0.345041	0.0355051	3.55051	10.5737		71.9962	52.9683	0.603782	1.88148	1.62061	0.353791	1.48952	4.93673	103.599	363.844	0.140372	0.55466	0.168509	211.03	16.5427	73.4656	4.96416	12.4041	1.84117	8.68384	2.71234	1.17711	3.03104	0.529496	3.1125	0.649586	1.77797	0.297275	1.76795	0.23185		28.165
253	2000	1069	28.0183	48.8866	0.822609	20.5204	1.879	7.84451	0.291894	4.39798	8.58078	2.82466	0.346798	0.035691	3.5691	10.5951		72.3027	53.0021	0.606937	1.89049	1.62897	0.347186	1.49586	4.96237	104.096	363.634	0.141099	0.557484	0.169341	211.607	16.5978	73.8333	4.98688	12.4596	1.84913	8.71969	2.72246	1.18131	3.04147	0.531273	3.12283	0.651755	1.78401	0.298309	1.77427	0.232701		28.0183
254	2000	1068	27.8732	48.9034	0.824627	20.5227	1.88222	7.86072	0.29312	4.36621	8.53942	2.83554	0.348553	0.0358768	3.58768	10.6164		72.6087	53.0361	0.61009	1.89949	1.63733	0.340754	1.50218	4.988	104.592	363.424	0.141827	0.560305	0.170171	212.184	16.6526	74.2007	5.00957	12.5151	1.85708	8.75548	2.73255	1.1855	3.05187	0.533044	3.13314	0.653917	1.79003	0.299339	1.78057	0.23355		27.8732
255	2000	1067	27.7297	48.9202	0.826617	20.5249	1.88542	7.87679	0.294343	4.33459	8.49817	2.8464	0.350307	0.0360624	3.60624	10.6374		72.9142	53.0704	0.613241	1.90848	1.64567	0.334489	1.50849	5.0136	105.088	363.212	0.142554	0.563124	0.171001	212.76	16.7072	74.5678	5.03223	12.5704	1.86502	8.79119	2.74261	1.18968	3.06223	0.534809	3.1434	0.656071	1.79603	0.300367	1.78685	0.234397		27.7297
256	2000	1066	27.5878	48.9371	0.828579	20.5269	1.8886	7.89273	0.295562	4.30313	8.45702	2.85723	0.352059	0.0362479	3.62479	10.6583		73.2191	53.105	0.61639	1.91746	1.65401	0.328385	1.51479	5.03919	105.583	362.998	0.14328	0.565941	0.171829	213.336	16.7617	74.9346	5.05486	12.6257	1.87294	8.82684	2.75265	1.19385	3.07257	0.536568	3.15364	0.658218	1.80201	0.301391	1.79311	0.235241		27.5878
257	2000	1065	27.4475	48.9541	0.830513	20.5289	1.89177	7.90855	0.296778	4.27182	8.41598	2.86804	0.353809	0.0364332	3.64332	10.679		73.5235	53.1399	0.619536	1.92644	1.66235	0.322438	1.52108	5.06476	106.078	362.783	0.144006	0.568755	0.172657	213.911	16.8159	75.3011	5.07746	12.6809	1.88085	8.86242	2.76267	1.19801	3.08288	0.538322	3.16384	0.660358	1.80797	0.302412	1.79935	0.236083		27.4475
258	2000	1064	27.3086	48.9711	0.832417	20.5308	1.89492	7.92423	0.297991	4.24066	8.37505	2.87882	0.355558	0.0366185	3.66185	10.6996		73.8275	53.175	0.622679	1.93541	1.67068	0.316642	1.52735	5.0903	106.572	362.567	0.144731	0.571566	0.173484	214.486	16.87	75.6672	5.10002	12.736	1.88875	8.89793	2.77266	1.20215	3.09315	0.54007	3.174	0.662492	1.81391	0.30343	1.80558	0.236922		27.3086
259	2000	1063	27.1713	48.9882	0.834293	20.5326	1.89805	7.93979	0.2992	4.20965	8.33422	2.88958	0.357305	0.0368035	3.68035	10.72		74.1309	53.2104	0.625821	1.94436	1.679	0.310994	1.53362	5.11583	107.065	362.35	0.145455	0.574375	0.174309	215.061	16.924	76.0331	5.12255	12.791	1.89664	8.93337	2.78262	1.20628	3.10339	0.541813	3.18414	0.664618	1.81983	0.304445	1.81178	0.237759		27.1713
260	2000	1062	27.0355	49.0053	0.83614	20.5343	1.90117	7.95521	0.300406	4.17879	8.2935	2.9003	0.359051	0.0369885	3.69885	10.7403		74.4337	53.2461	0.62896	1.95331	1.68731	0.305487	1.53987	5.14134	107.558	362.131	0.146179	0.577181	0.175134	215.635	16.9777	76.3986	5.14505	12.846	1.90451	8.96875	2.79257	1.21041	3.11361	0.54355	3.19424	0.666737	1.82573	0.305457	1.81797	0.238594		27.0355
261	2000	1061	26.9011	49.0225	0.837957	20.5359	1.90427	7.97051	0.301609	4.14808	8.25288	2.911	0.360794	0.0371733	3.71733	10.7604		74.7361	53.2821	0.632096	1.96225	1.69562	0.300119	1.5461	5.16682	108.051	361.911	0.146903	0.579985	0.175958	216.208	17.0313	76.7637	5.16752	12.9009	1.91237	9.00406	2.80248	1.21452	3.12379	0.545282	3.2043	0.66885	1.83162	0.306466	1.82414	0.239427		26.9011
262	2000	1060	26.7681	49.0398	0.839745	20.5374	1.90736	7.98567	0.302808	4.11752	8.21237	2.92168	0.362536	0.0373579	3.73579	10.7803		75.038	53.3183	0.63523	1.97119	1.70392	0.294884	1.55233	5.19229	108.542	361.69	0.147625	0.582785	0.176781	216.782	17.0847	77.1286	5.18995	12.9556	1.92021	9.03931	2.81237	1.21862	3.13394	0.547008	3.21434	0.670955	1.83748	0.307472	1.8303	0.240257		26.7681
263	2000	1059	26.6365	49.0571	0.841503	20.5388	1.91042	8.00071	0.304004	4.08711	8.17197	2.93233	0.364277	0.0375424	3.75424	10.8001		75.3393	53.3548	0.638362	1.98011	1.71221	0.289779	1.55854	5.21773	109.033	361.468	0.148348	0.585584	0.177603	217.355	17.1379	77.4931	5.21236	13.0103	1.92804	9.07449	2.82224	1.22271	3.14407	0.548729	3.22434	0.673055	1.84333	0.308474	1.83643	0.241085		26.6365
264	2000	1058	26.1822	49.5118	0.789007	20.5878	1.83026	7.59427	0.309279	4.02262	8.14988	2.97689	0.370519	0.0381939	3.81939	10.2683		76.5595	52.8375	0.649621	2.01297	1.74219	0.282957	1.58371	5.30952	110.876	364.665	0.150951	0.595792	0.180657	219.896	17.3575	78.8216	5.2973	13.2183	1.958	9.21036	2.86136	1.23912	3.18514	0.555764	3.26534	0.681634	1.86708	0.312512	1.86092	0.24436		26.1822
265	2000	1057	26.0216	49.5881	0.781265	20.6042	1.82016	7.54657	0.311188	3.99755	8.10491	2.99189	0.372766	0.0384296	3.84296	10.2052		76.9723	52.7228	0.653598	2.024	1.75272	0.277309	1.59221	5.3419	111.505	365.259	0.151867	0.599378	0.181722	220.425	17.4113	79.2802	5.32589	13.2868	1.96758	9.25212	2.87229	1.2435	3.19567	0.557514	3.27539	0.683745	1.87302	0.313547	1.86736	0.245244		26.0216
266	2000	1056	25.8633	49.6638	0.773595	20.6203	1.81013	7.49922	0.313092	3.97276	8.0601	3.00682	0.375006	0.0386648	3.86648	10.1426		77.3893	52.6081	0.657618	2.03515	1.76337	0.271875	1.60079	5.37463	112.141	365.856	0.152792	0.603001	0.182799	220.973	17.466	79.744	5.35479	13.3562	1.97728	9.29441	2.88338	1.24795	3.20638	0.559295	3.28563	0.685894	1.87907	0.314599	1.8739	0.246142		25.8633
267	2000	1055	25.7074	49.739	0.765998	20.6362	1.80016	7.4522	0.314991	3.94824	8.01546	3.02166	0.37724	0.0388993	3.88993	10.0804		77.8046	52.4963	0.661628	2.04628	1.77399	0.266623	1.60933	5.40727	112.775	366.435	0.153716	0.606615	0.183872	221.52	17.5202	80.2065	5.38358	13.4252	1.98695	9.3365	2.89441	1.25237	3.21701	0.561063	3.29578	0.688026	1.88507	0.315643	1.8804	0.247034		25.7074
268	2000	1054	25.5537	49.8138	0.758474	20.6517	1.79027	7.40553	0.316886	3.92399	7.97098	3.03643	0.379467	0.0391333	3.91333	10.0186		78.218	52.3875	0.665627	2.05738	1.78458	0.261546	1.61783	5.43983	113.407	366.997	0.154636	0.610218	0.184942	222.068	17.5741	80.6678	5.41227	13.4941	1.99657	9.3784	2.90537	1.25677	3.22757	0.562816	3.30586	0.690141	1.89102	0.316679	1.88685	0.247919		25.5537
269	2000	1053	25.3994	49.8888	0.751648	20.664	1.78091	7.36039	0.318727	3.89719	7.92902	3.05119	0.381726	0.039371	3.9371	9.95912		78.6319	52.3081	0.669689	2.06879	1.79534	0.256854	1.62635	5.47289	114.05	367.406	0.155572	0.613871	0.186024	222.714	17.6344	81.1385	5.44149	13.5646	2.00651	9.42222	2.91715	1.26156	3.23923	0.564773	3.31715	0.692511	1.89765	0.317827	1.89394	0.248885		25.3994
270	2000	1052	25.2445	49.9641	0.745501	20.6728	1.77207	7.31671	0.320513	3.86788	7.88957	3.06595	0.384018	0.0396125	3.96125	9.90175		79.0464	52.2582	0.673815	2.08051	1.80628	0.252535	1.63488	5.50645	114.704	367.661	0.156524	0.617575	0.187119	223.462	17.7014	81.6188	5.47125	13.6369	2.01679	9.46804	2.9298	1.26676	3.25203	0.566939	3.32971	0.695145	1.905	0.319089	1.90169	0.249934		25.2445
271	2000	1051	25.0917	50.0392	0.7394	20.6813	1.76328	7.27329	0.322293	3.83884	7.8503	3.08064	0.386305	0.0398537	3.98537	9.84471		79.4592	52.2114	0.677935	2.09223	1.8172	0.248361	1.64337	5.53996	115.357	367.896	0.157474	0.621272	0.188211	224.212	17.7684	82.0985	5.50094	13.709	2.02706	9.51377	2.94243	1.27196	3.26482	0.569103	3.34225	0.697775	1.91234	0.32035	1.90943	0.250981		25.0917
272	2000	1050	24.941	50.1138	0.733346	20.6894	1.75455	7.23013	0.324067	3.81008	7.81121	3.09526	0.388588	0.0400946	4.00946	9.78803		79.8705	52.1674	0.682048	2.10392	1.8281	0.244327	1.65183	5.57342	116.009	368.112	0.158423	0.624962	0.189301	224.966	17.8352	82.5774	5.53056	13.7809	2.0373	9.55942	2.95503	1.27715	3.27759	0.571264	3.35478	0.700403	1.91967	0.32161	1.91715	0.252027		24.941
273	2000	1049	24.7924	50.1881	0.727339	20.6972	1.74586	7.18724	0.325834	3.78159	7.7723	3.10981	0.390866	0.040335	4.0335	9.73168		80.2802	52.1263	0.686154	2.11561	1.83899	0.240426	1.66025	5.60682	116.66	368.309	0.15937	0.628646	0.190389	225.723	17.902	83.0556	5.5601	13.8527	2.04751	9.60497	2.96762	1.28233	3.29034	0.573423	3.3673	0.703028	1.92699	0.322868	1.92487	0.253072		24.7924
274	2000	1048	24.6457	50.2621	0.721378	20.7047	1.73723	7.14461	0.327595	3.75337	7.73357	3.12428	0.39314	0.040575	4.0575	9.67569		80.6884	52.088	0.690254	2.12727	1.84985	0.236652	1.66864	5.64016	117.309	368.488	0.160316	0.632322	0.191473	226.483	17.9688	83.533	5.58958	13.9244	2.05771	9.65043	2.98019	1.2875	3.30308	0.575579	3.3798	0.705649	1.9343	0.324124	1.93258	0.254115		24.6457
275	2000	1047	24.501	50.3357	0.715465	20.7118	1.72866	7.10224	0.32935	3.72541	7.69501	3.13868	0.395409	0.0408147	4.08147	9.62004		81.095	52.0524	0.694346	2.13893	1.8607	0.233001	1.677	5.67345	117.957	368.648	0.16126	0.63599	0.192556	227.246	18.0354	84.0097	5.61897	13.9958	2.06788	9.6958	2.99273	1.29267	3.3158	0.577732	3.39228	0.708267	1.9416	0.325378	1.94028	0.255156		24.501
276	2000	1046	24.3582	50.4089	0.7096	20.7186	1.72013	7.06014	0.331098	3.69772	7.65663	3.15301	0.397674	0.0410539	4.10539	9.56473		81.5	52.0195	0.698432	2.15056	1.87153	0.229467	1.68532	5.70667	118.604	368.791	0.162203	0.639651	0.193635	228.012	18.1019	84.4856	5.6483	14.0671	2.07803	9.74107	3.00525	1.29782	3.32849	0.579882	3.40475	0.710882	1.94889	0.326631	1.94796	0.256196		24.3582
277	2000	1045	24.2174	50.4818	0.703782	20.7251	1.71166	7.0183	0.33284	3.67028	7.61842	3.16727	0.399934	0.0412927	4.12927	9.50977		81.9035	51.989	0.70251	2.16218	1.88234	0.226046	1.69361	5.73984	119.249	368.917	0.163143	0.643305	0.194712	228.781	18.1684	84.9608	5.67754	14.1382	2.08816	9.78625	3.01775	1.30297	3.34118	0.582029	3.4172	0.713493	1.95617	0.327882	1.95563	0.257234		24.2174
278	2000	1044	24.0784	50.5544	0.698012	20.7313	1.70324	6.97672	0.334575	3.6431	7.58039	3.18145	0.402189	0.0415311	4.15311	9.45515		82.3054	51.9611	0.706582	2.17379	1.89313	0.222734	1.70186	5.77295	119.893	369.026	0.164083	0.646951	0.195787	229.552	18.2348	85.4351	5.70671	14.2092	2.09826	9.83134	3.03023	1.30811	3.35384	0.584173	3.42963	0.716101	1.96344	0.329131	1.9633	0.258271		24.0784
279	2000	1043	23.9412	50.6266	0.692291	20.7371	1.69487	6.93541	0.336304	3.61617	7.54253	3.19557	0.40444	0.041769	4.1769	9.40088		82.7058	51.9357	0.710646	2.18537	1.9039	0.219525	1.71008	5.80599	120.536	369.119	0.16502	0.65059	0.196858	230.326	18.301	85.9087	5.73581	14.2799	2.10835	9.87633	3.04268	1.31324	3.36648	0.586314	3.44205	0.718705	1.97071	0.330378	1.97095	0.259306		23.9412
280	2000	1042	23.8058	50.6985	0.686617	20.7426	1.68656	6.89436	0.338027	3.58949	7.50484	3.20961	0.406686	0.0420065	4.20065	9.34696		83.1046	51.9126	0.714703	2.19694	1.91465	0.216417	1.71827	5.83898	121.177	369.195	0.165956	0.654221	0.197927	231.102	18.3672	86.3815	5.76483	14.3505	2.11841	9.92123	3.05512	1.31837	3.3791	0.588452	3.45445	0.721306	1.97796	0.331624	1.97859	0.260339		23.8058
281	2000	1041	23.6722	50.7701	0.680991	20.7478	1.6783	6.85358	0.339743	3.56305	7.46733	3.22358	0.408927	0.0422436	4.22436	9.29339		83.5019	51.8918	0.718752	2.2085	1.92538	0.213404	1.72642	5.8719	121.817	369.256	0.166891	0.657844	0.198994	231.88	18.4333	86.8534	5.79377	14.4209	2.12844	9.96603	3.06753	1.32348	3.3917	0.590587	3.46683	0.723903	1.9852	0.332868	1.98621	0.261371		23.6722
282	2000	1040	23.5404	50.8413	0.675414	20.7527	1.67009	6.81305	0.341452	3.53687	7.42999	3.23747	0.411163	0.0424802	4.24802	9.24015		83.8977	51.8733	0.722794	2.22003	1.93609	0.210484	1.73453	5.90476	122.456	369.301	0.167823	0.661459	0.200058	232.661	18.4993	87.3245	5.82264	14.4912	2.13845	10.0107	3.07991	1.32859	3.40429	0.592719	3.4792	0.726496	1.99243	0.33411	1.99383	0.262401		23.5404
283	2000	1039	23.4102	50.9122	0.669884	20.7573	1.66193	6.77279	0.343155	3.51092	7.39281	3.2513	0.413394	0.0427164	4.27164	9.18725		84.2919	51.857	0.726828	2.23155	1.94678	0.207653	1.74262	5.93756	123.094	369.332	0.168754	0.665067	0.201119	233.445	18.5652	87.7948	5.85144	14.5613	2.14844	10.0553	3.09228	1.33368	3.41685	0.594848	3.49155	0.729086	1.99965	0.33535	2.00143	0.26343		23.4102
284	2000	1038	23.2817	50.9827	0.664402	20.7616	1.65382	6.73278	0.344852	3.48521	7.35581	3.26505	0.415621	0.0429522	4.29522	9.13469		84.6846	51.8429	0.730855	2.24305	1.95745	0.204907	1.75067	5.9703	123.73	369.348	0.169683	0.668667	0.202177	234.23	18.631	88.2642	5.88015	14.6312	2.15841	10.0999	3.10462	1.33877	3.4294	0.596974	3.50388	0.731672	2.00686	0.336588	2.00903	0.264457		23.2817
285	2000	1037	23.1549	51.0529	0.658967	20.7656	1.64576	6.69303	0.346543	3.45973	7.31898	3.27873	0.417842	0.0431875	4.31875	9.08246		85.0758	51.8309	0.734874	2.25453	1.9681	0.202244	1.75868	6.00297	124.364	369.349	0.170611	0.672259	0.203233	235.018	18.6968	88.7329	5.90879	14.7009	2.16835	10.1443	3.11694	1.34385	3.44192	0.599097	3.51619	0.734255	2.01406	0.337824	2.01661	0.265482		23.1549
286	2000	1036	23.0296	51.1228	0.65358	20.7692	1.63776	6.65353	0.348226	3.43449	7.28232	3.29234	0.420059	0.0434223	4.34223	9.03057		85.4654	51.8209	0.738886	2.266	1.97873	0.199661	1.76666	6.03558	124.998	369.336	0.171536	0.675843	0.204286	235.808	18.7624	89.2006	5.93736	14.7705	2.17827	10.1886	3.12924	1.34892	3.45443	0.601216	3.52849	0.736834	2.02125	0.339059	2.02418	0.266506		23.0296
287	2000	1035	22.906	51.1924	0.648239	20.7726	1.6298	6.61429	0.349904	3.40948	7.24583	3.30588	0.422271	0.0436568	4.36568	8.97901		85.8536	51.813	0.74289	2.27744	1.98934	0.197153	1.77461	6.06813	125.63	369.31	0.17246	0.67942	0.205336	236.6	18.828	89.6676	5.96584	14.8398	2.18817	10.2328	3.14152	1.35399	3.46692	0.603333	3.54077	0.73941	2.02843	0.340292	2.03173	0.267528		22.906
288	2000	1034	22.7839	51.2616	0.642946	20.7757	1.62189	6.5753	0.351575	3.38469	7.20951	3.31935	0.424478	0.0438907	4.38907	8.92778		86.2403	51.807	0.746887	2.28887	1.99992	0.19472	1.78253	6.10061	126.261	369.27	0.173383	0.682988	0.206384	237.394	18.8934	90.1337	5.99426	14.9091	2.19805	10.277	3.15377	1.35904	3.47939	0.605447	3.55304	0.741982	2.0356	0.341523	2.03928	0.268548		22.7839
289	2000	1033	22.6633	51.3306	0.6377	20.7784	1.61404	6.53656	0.35324	3.36013	7.17335	3.33274	0.42668	0.0441242	4.41242	8.87688		86.6255	51.803	0.750875	2.30029	2.01049	0.192357	1.79041	6.13303	126.89	369.217	0.174303	0.686549	0.207429	238.191	18.9588	90.599	6.0226	14.9781	2.2079	10.321	3.16601	1.36409	3.49184	0.607558	3.56529	0.744551	2.04276	0.342752	2.04682	0.269567		22.6633
290	2000	1032	22.5442	51.3992	0.6325	20.7809	1.60623	6.49807	0.354898	3.33579	7.13736	3.34606	0.428877	0.0443573	4.43573	8.82631		87.0092	51.8009	0.754857	2.31168	2.02104	0.190063	1.79826	6.16539	127.518	369.151	0.175222	0.690102	0.208471	238.989	19.0241	91.0634	6.05086	15.047	2.21773	10.365	3.17822	1.36913	3.50428	0.609667	3.57752	0.747117	2.04991	0.34398	2.05434	0.270585		22.5442
291	2000	1031	22.4266	51.4675	0.627346	20.7831	1.59847	6.45983	0.35655	3.31167	7.10153	3.35932	0.431069	0.0445899	4.45899	8.77606		87.3915	51.8007	0.75883	2.32306	2.03157	0.187835	1.80608	6.19768	128.145	369.073	0.176139	0.693647	0.209511	239.789	19.0893	91.527	6.07905	15.1157	2.22754	10.4088	3.19041	1.37416	3.5167	0.611772	3.58974	0.74968	2.05705	0.345206	2.06186	0.271601		22.4266
292	2000	1030	22.3104	51.5355	0.622238	20.785	1.59076	6.42183	0.358196	3.28777	7.06588	3.3725	0.433256	0.0448221	4.48221	8.72613		87.7723	51.8023	0.762796	2.33441	2.04207	0.185671	1.81386	6.22991	128.77	368.982	0.177054	0.697185	0.210548	240.591	19.1544	91.9897	6.10716	15.1842	2.23733	10.4526	3.20259	1.37919	3.5291	0.613875	3.60195	0.752239	2.06419	0.34643	2.06936	0.272615		22.3104
293	2000	1029	22.1957	51.6032	0.617176	20.7867	1.5831	6.38407	0.359836	3.26408	7.03038	3.38561	0.435439	0.0450538	4.50538	8.67651		88.1516	51.8056	0.766755	2.34575	2.05256	0.183569	1.82161	6.26208	129.394	368.879	0.177968	0.700714	0.211582	241.395	19.2195	92.4516	6.1352	15.2526	2.24709	10.4963	3.21474	1.38421	3.54148	0.615976	3.61414	0.754796	2.07131	0.347653	2.07685	0.273628		22.1957
294	2000	1028	22.0823	51.6706	0.61216	20.788	1.57548	6.34656	0.361469	3.24061	6.99505	3.39865	0.437616	0.0452851	4.52851	8.62721		88.5295	51.8107	0.770705	2.35708	2.06302	0.181526	1.82933	6.29418	130.017	368.765	0.17888	0.704236	0.212614	242.201	19.2845	92.9127	6.16317	15.3208	2.25683	10.5399	3.22687	1.38922	3.55385	0.618073	3.62631	0.757349	2.07843	0.348875	2.08434	0.27464		22.0823
295	2000	1027	21.9703	51.7376	0.607188	20.7891	1.56792	6.30928	0.363096	3.21734	6.95989	3.41162	0.439789	0.0455159	4.55159	8.57823		88.906	51.8176	0.774649	2.36838	2.07347	0.179541	1.83702	6.32622	130.638	368.638	0.17979	0.70775	0.213643	243.009	19.3494	93.373	6.19107	15.3888	2.26655	10.5834	3.23898	1.39422	3.5662	0.620169	3.63848	0.7599	2.08554	0.350094	2.09181	0.27565		21.9703
296	2000	1026	21.8597	51.8044	0.602261	20.7899	1.5604	6.27225	0.364716	3.19428	6.92489	3.42452	0.441956	0.0457463	4.57463	8.52957		89.2811	51.8261	0.778584	2.37967	2.08389	0.177611	1.84467	6.3582	131.258	368.501	0.180698	0.711256	0.21467	243.819	19.4142	93.8324	6.21889	15.4567	2.27625	10.6268	3.25107	1.39921	3.57854	0.622262	3.65063	0.762448	2.09264	0.351313	2.09928	0.276659		21.8597
297	2000	1025	21.7504	51.8709	0.597379	20.7905	1.55292	6.23544	0.366331	3.17143	6.89005	3.43735	0.444119	0.0459762	4.59762	8.48119		89.6548	51.8362	0.782512	2.39094	2.0943	0.175735	1.8523	6.39012	131.877	368.352	0.181605	0.714755	0.215693	244.631	19.479	94.2909	6.24664	15.5244	2.28593	10.6702	3.26315	1.4042	3.59086	0.624353	3.66276	0.764993	2.09973	0.35253	2.10673	0.277666		21.7504
298	2000	1024	21.6423	51.9371	0.59254	20.7907	1.54549	6.19888	0.367939	3.14878	6.85537	3.45011	0.446277	0.0462057	4.62057	8.43313		90.027	51.848	0.786433	2.40219	2.10468	0.173911	1.85989	6.42197	132.494	368.193	0.18251	0.718246	0.216715	245.444	19.5437	94.7487	6.27431	15.5919	2.29558	10.7134	3.2752	1.40918	3.60316	0.626441	3.67489	0.767536	2.10681	0.353745	2.11418	0.278673		21.6423
299	2000	1023	21.5356	52.003	0.587746	20.7908	1.53811	6.16254	0.369541	3.12632	6.82086	3.4628	0.448431	0.0464348	4.64348	8.38538		90.3979	51.8614	0.790346	2.41343	2.11505	0.172138	1.86745	6.45376	133.11	368.022	0.183413	0.721729	0.217733	246.259	19.6084	95.2056	6.30192	15.6593	2.30522	10.7566	3.28724	1.41416	3.61546	0.628528	3.687	0.770076	2.11389	0.35496	2.12162	0.279678		21.5356
300	2000	1022	21.4301	52.0686	0.582995	20.7905	1.53077	6.12643	0.371136	3.10407	6.7865	3.47542	0.450579	0.0466634	4.66634	8.33791		90.7674	51.8764	0.794251	2.42464	2.12539	0.170412	1.87498	6.48549	133.725	367.842	0.184315	0.725205	0.218749	247.076	19.6729	95.6617	6.32946	15.7265	2.31484	10.7997	3.29926	1.41913	3.62774	0.630612	3.6991	0.772614	2.12096	0.356173	2.12904	0.280681		21.4301
301	2000	1021	21.3258	52.1339	0.578287	20.79	1.52348	6.09055	0.372726	3.08201	6.75231	3.48797	0.452723	0.0468915	4.68915	8.29076		91.1356	51.8929	0.798149	2.43584	2.13571	0.168734	1.88248	6.51716	134.339	367.651	0.185215	0.728673	0.219763	247.895	19.7375	96.117	6.35692	15.7936	2.32443	10.8427	3.31127	1.42409	3.64	0.632694	3.7112	0.77515	2.12803	0.357384	2.13647	0.281684		21.3258
302	2000	1020	21.2227	52.1989	0.573622	20.7892	1.51623	6.0549	0.374309	3.06015	6.71827	3.50045	0.454862	0.0471193	4.71193	8.2439		91.5024	51.9109	0.80204	2.44703	2.14602	0.167102	1.88995	6.54877	134.951	367.45	0.186113	0.732133	0.220774	248.716	19.802	96.5715	6.38432	15.8605	2.334	10.8856	3.32325	1.42905	3.65226	0.634775	3.72328	0.777684	2.13509	0.358595	2.14388	0.282686		21.2227
303	2000	1019	21.1208	52.2637	0.568999	20.7882	1.50903	6.01947	0.375887	3.03847	6.6844	3.51286	0.456996	0.0473466	4.73466	8.19733		91.8678	51.9304	0.805923	2.45819	2.1563	0.165514	1.89739	6.58031	135.562	367.239	0.187009	0.735586	0.221782	249.538	19.8664	97.0252	6.41164	15.9273	2.34356	10.9284	3.33522	1.434	3.6645	0.636854	3.73535	0.780216	2.14214	0.359805	2.15129	0.283686		21.1208
304	2000	1018	21.0201	52.3282	0.564419	20.7869	1.50187	5.98426	0.377458	3.01699	6.65068	3.52521	0.459125	0.0475735	4.75735	8.15105		92.2319	51.9514	0.809799	2.46934	2.16657	0.163968	1.9048	6.6118	136.172	367.018	0.187904	0.739032	0.222788	250.363	19.9308	97.4781	6.4389	15.9939	2.35309	10.9712	3.34718	1.43895	3.67673	0.638932	3.74742	0.782746	2.14919	0.361013	2.15869	0.284686		21.0201
305	2000	1017	20.9068	52.3874	0.560549	20.7821	1.49532	5.94978	0.379504	2.9913	6.62242	3.53907	0.461541	0.0478313	4.78313	8.10619		92.6402	51.9683	0.814202	2.48235	2.17825	0.162327	1.9131	6.64755	136.842	366.648	0.188923	0.74294	0.223926	251.289	20.0224	97.9963	6.47047	16.0723	2.36458	11.0242	3.36294	1.44564	3.69366	0.641854	3.76452	0.786326	2.15907	0.362684	2.16875	0.286022		20.9068
306	2000	1016	20.7941	52.4464	0.556776	20.7767	1.48886	5.91555	0.381561	2.96548	6.59467	3.55294	0.463969	0.0480906	4.80906	8.06169		93.0493	51.9888	0.818628	2.49546	2.18999	0.16074	1.92142	6.68348	137.514	366.25	0.189947	0.746866	0.22507	252.23	20.1161	98.5177	6.50223	16.1513	2.37617	11.0779	3.37896	1.45246	3.71094	0.64484	3.782	0.789984	2.16916	0.364388	2.17901	0.287383		20.7941
307	2000	1015	20.6827	52.5051	0.553026	20.7709	1.48242	5.88152	0.383616	2.93991	6.56702	3.56674	0.466394	0.0483496	4.83496	8.01744		93.4572	52.0106	0.823049	2.50856	2.20172	0.159196	1.92971	6.71939	138.186	365.844	0.19097	0.750788	0.226211	253.174	20.2099	99.0387	6.53394	16.2303	2.38776	11.1315	3.395	1.45929	3.72825	0.647831	3.79952	0.79365	2.17928	0.366096	2.18929	0.288747		20.6827
308	2000	1014	20.5726	52.5636	0.5493	20.7649	1.47602	5.84767	0.38567	2.91457	6.53948	3.58049	0.468816	0.0486084	4.86084	7.97343		93.864	52.0339	0.827467	2.52166	2.21344	0.157694	1.93798	6.75526	138.857	365.429	0.191992	0.754706	0.227351	254.119	20.304	99.5593	6.56561	16.3091	2.39934	11.1851	3.41105	1.46613	3.74558	0.650828	3.81707	0.797323	2.18941	0.367807	2.19958	0.290112		20.5726
309	2000	1013	20.4637	52.6219	0.545599	20.7586	1.46965	5.81403	0.387721	2.88948	6.51203	3.59418	0.471235	0.048867	4.8867	7.92968		94.2698	52.0586	0.831881	2.53475	2.22515	0.156232	1.94622	6.79109	139.527	365.006	0.193014	0.758618	0.228488	255.066	20.3982	100.079	6.59724	16.3879	2.41091	11.2388	3.42712	1.47297	3.76294	0.65383	3.83465	0.801004	2.19956	0.369521	2.20989	0.291479		20.4637
310	2000	1012	20.3561	52.6799	0.541923	20.7521	1.46331	5.78057	0.389771	2.86462	6.48469	3.60781	0.473651	0.0491253	4.91253	7.88617		94.6744	52.0846	0.836291	2.54783	2.23684	0.15481	1.95443	6.82689	140.196	364.574	0.194034	0.762526	0.229625	256.015	20.4926	100.599	6.62883	16.4666	2.42247	11.2924	3.4432	1.47982	3.78033	0.656838	3.85227	0.804691	2.20974	0.371238	2.22021	0.292848		20.3561
311	2000	1011	20.2497	52.7377	0.53827	20.7453	1.457	5.7473	0.391819	2.83999	6.45745	3.62137	0.476064	0.0493834	4.93834	7.84289		95.0779	52.112	0.840696	2.56091	2.24853	0.153426	1.96262	6.86266	140.865	364.135	0.195054	0.76643	0.230759	256.966	20.5872	101.119	6.66037	16.5452	2.43403	11.346	3.4593	1.48669	3.79774	0.659851	3.86993	0.808386	2.21993	0.372958	2.23056	0.294219		20.2497
312	2000	1010	20.1445	52.7953	0.534642	20.7382	1.45072	5.71423	0.393865	2.8156	6.43032	3.63488	0.478475	0.0496413	4.96413	7.79986		95.4803	52.1406	0.845098	2.57398	2.26021	0.15208	1.97078	6.89839	141.533	363.687	0.196072	0.770328	0.231891	257.919	20.682	101.638	6.69187	16.6238	2.44559	11.3997	3.47541	1.49356	3.81519	0.66287	3.88762	0.812089	2.23014	0.374681	2.24092	0.295592		20.1445
313	2000	1009	20.0405	52.8527	0.531039	20.7309	1.44448	5.68134	0.395909	2.79143	6.40328	3.64833	0.480882	0.0498989	4.98989	7.75708		95.8817	52.1705	0.849496	2.58705	2.27187	0.150769	1.97891	6.93409	142.2	363.231	0.19709	0.774222	0.233022	258.874	20.777	102.156	6.72332	16.7022	2.45714	11.4533	3.49153	1.50044	3.83267	0.665895	3.90534	0.815799	2.24037	0.376408	2.2513	0.296968		20.0405
314	2000	1008	19.9377	52.9098	0.527461	20.7233	1.43826	5.64864	0.397951	2.76749	6.37635	3.66172	0.483286	0.0501563	5.01563	7.71453		96.2819	52.2017	0.85389	2.60011	2.28353	0.149493	1.98702	6.96976	142.866	362.768	0.198107	0.778112	0.234151	259.83	20.8722	102.674	6.75474	16.7806	2.46868	11.5069	3.50768	1.50733	3.85017	0.668926	3.92311	0.819518	2.25062	0.378137	2.26169	0.298345		19.9377
315	2000	1007	19.836	52.9667	0.523906	20.7155	1.43207	5.61612	0.399991	2.74377	6.34951	3.67504	0.485687	0.0504135	5.04135	7.6722		96.6811	52.2342	0.85828	2.61316	2.29517	0.14825	1.9951	7.0054	143.532	362.298	0.199123	0.781997	0.235279	260.788	20.9676	103.192	6.78611	16.859	2.48022	11.5606	3.52384	1.51424	3.86771	0.671963	3.94091	0.823243	2.2609	0.37987	2.27211	0.299725		19.836
316	2000	1006	19.7354	53.0233	0.520377	20.7074	1.42591	5.58379	0.40203	2.72027	6.32278	3.68831	0.488085	0.0506704	5.06704	7.63012		97.0793	52.2679	0.862666	2.62621	2.30681	0.147041	2.00316	7.041	144.197	361.821	0.200138	0.785877	0.236404	261.749	21.0632	103.71	6.81745	16.9372	2.49175	11.6142	3.54002	1.52115	3.88527	0.675006	3.95875	0.826977	2.27119	0.381606	2.28254	0.301106		19.7354
317	2000	1005	19.6359	53.0798	0.516872	20.6991	1.41979	5.55164	0.404067	2.69699	6.29615	3.70152	0.490481	0.0509271	5.09271	7.58828		97.4764	52.3028	0.867049	2.63925	2.31843	0.145863	2.01119	7.07657	144.861	361.336	0.201153	0.789753	0.237528	262.71	21.159	104.227	6.84874	17.0154	2.50327	11.6678	3.55621	1.52807	3.90287	0.678055	3.97662	0.830719	2.28151	0.383346	2.29299	0.30249		19.6359
318	2000	1004	19.5375	53.136	0.513392	20.6905	1.41369	5.51967	0.406101	2.67393	6.26962	3.71467	0.492873	0.0511836	5.11836	7.54666		97.8725	52.3389	0.871427	2.65229	2.33004	0.144716	2.0192	7.1121	145.524	360.844	0.202166	0.793624	0.23865	263.674	21.2551	104.743	6.87999	17.0935	2.5148	11.7215	3.57242	1.535	3.9205	0.68111	3.99454	0.834469	2.29185	0.385089	2.30346	0.303876		19.5375
319	2000	1003	19.4402	53.192	0.509936	20.6817	1.40762	5.48789	0.408134	2.65108	6.24319	3.72776	0.495262	0.0514398	5.14398	7.50528		98.2675	52.3761	0.875801	2.66532	2.34164	0.1436	2.02718	7.14761	146.187	360.346	0.203179	0.797491	0.239771	264.64	21.3513	105.259	6.9112	17.1715	2.52631	11.7751	3.58865	1.54194	3.93817	0.684172	4.0125	0.838228	2.30221	0.386835	2.31394	0.305264		19.4402
320	2000	1002	19.3439	53.2478	0.506505	20.6727	1.40158	5.45628	0.410166	2.62844	6.21686	3.74079	0.497649	0.0516958	5.16958	7.46411		98.6615	52.4146	0.880172	2.67835	2.35324	0.142512	2.03514	7.18308	146.849	359.842	0.204191	0.801353	0.24089	265.607	21.4478	105.775	6.94237	17.2495	2.53782	11.8288	3.6049	1.54889	3.95586	0.68724	4.03049	0.841994	2.31259	0.388585	2.32445	0.306655		19.3439
321	2000	1001	19.2487	53.3033	0.503099	20.6634	1.39557	5.42485	0.412195	2.606	6.19063	3.75376	0.500033	0.0519516	5.19516	7.42318		99.0545	52.4541	0.884539	2.69137	2.36482	0.141453	2.04307	7.21852	147.51	359.331	0.205202	0.805211	0.242007	266.576	21.5445	106.291	6.97351	17.3274	2.54933	11.8825	3.62117	1.55586	3.97359	0.690315	4.04853	0.84577	2.323	0.390339	2.33498	0.308048		19.2487
322	2000	1000	19.1545	53.3587	0.499717	20.6539	1.38958	5.3936	0.414223	2.58378	6.1645	3.76667	0.502413	0.0522072	5.22072	7.38247		99.4465	52.4948	0.888902	2.70438	2.37639	0.140422	2.05098	7.25392	148.171	358.813	0.206212	0.809064	0.243122	267.547	21.6414	106.806	7.0046	17.4052	2.56083	11.9362	3.63746	1.56283	3.99136	0.693396	4.06661	0.849554	2.33342	0.392096	2.34552	0.309443		19.1545
323	2000	999	19.0612	53.4138	0.496359	20.6441	1.38363	5.36252	0.416249	2.56176	6.13847	3.77952	0.504791	0.0524625	5.24625	7.34199		99.8376	52.5366	0.893261	2.71739	2.38795	0.139417	2.05886	7.2893	148.831	358.29	0.207221	0.812913	0.244236	268.52	21.7385	107.32	7.03565	17.483	2.57233	11.9898	3.65376	1.56982	4.00915	0.696484	4.08473	0.853346	2.34387	0.393857	2.35609	0.310841		19.0612
324	2000	998	18.969	53.4688	0.493026	20.6342	1.3777	5.33162	0.418273	2.53994	6.11254	3.79232	0.507166	0.0527177	5.27177	7.30172		100.228	52.5795	0.897617	2.73039	2.3995	0.138439	2.06672	7.32464	149.49	357.761	0.20823	0.816758	0.245348	269.494	21.8358	107.835	7.06667	17.5607	2.58383	12.0435	3.67009	1.57682	4.02699	0.699579	4.10289	0.857148	2.35435	0.395621	2.36668	0.312241		18.969
325	2000	997	18.8777	53.5235	0.489717	20.624	1.3718	5.30089	0.420296	2.51832	6.08671	3.80505	0.509538	0.0529726	5.29726	7.26168		100.617	52.6235	0.901969	2.74339	2.41104	0.137486	2.07456	7.35996	150.149	357.226	0.209237	0.820599	0.246459	270.471	21.9334	108.349	7.09765	17.6384	2.59532	12.0973	3.68644	1.58383	4.04486	0.702681	4.12109	0.860959	2.36485	0.39739	2.37729	0.313644		18.8777
326	2000	996	18.7874	53.578	0.486433	20.6135	1.36593	5.27033	0.422317	2.4969	6.06097	3.81773	0.511908	0.0532273	5.32273	7.22185		101.005	52.6686	0.906317	2.75638	2.42258	0.136557	2.08237	7.39524	150.807	356.685	0.210244	0.824435	0.247568	271.449	22.0313	108.862	7.1286	17.716	2.60681	12.151	3.70281	1.59085	4.06277	0.705791	4.13934	0.864779	2.37537	0.399162	2.38791	0.315049		18.7874
327	2000	995	18.698	53.6323	0.483172	20.6029	1.36009	5.23994	0.424336	2.47567	6.03534	3.83034	0.514274	0.0534817	5.34817	7.18225		101.392	52.7147	0.910662	2.76937	2.4341	0.135653	2.09015	7.4305	151.464	356.138	0.21125	0.828267	0.248675	272.429	22.1294	109.375	7.1595	17.7935	2.6183	12.2047	3.71921	1.59788	4.08071	0.708907	4.15764	0.868608	2.38592	0.400938	2.39857	0.316456		18.698
328	2000	994	18.6095	53.6864	0.479936	20.592	1.35427	5.20972	0.426353	2.45464	6.0098	3.8429	0.516638	0.053736	5.3736	7.14285		101.778	52.7618	0.915003	2.78235	2.44561	0.134772	2.09792	7.46572	152.121	355.587	0.212256	0.832094	0.249781	273.411	22.2277	109.888	7.19038	17.871	2.62978	12.2585	3.73562	1.60493	4.0987	0.712031	4.17598	0.872447	2.39649	0.402718	2.40924	0.317867		18.6095
329	2000	993	18.5219	53.7403	0.476724	20.5809	1.34848	5.17966	0.428369	2.4338	5.98437	3.8554	0.518999	0.0539901	5.39901	7.10366		102.163	52.81	0.919341	2.79533	2.45711	0.133913	2.10566	7.50091	152.777	355.03	0.21326	0.835918	0.250885	274.394	22.3263	110.401	7.22121	17.9484	2.64126	12.3123	3.75206	1.61199	4.11672	0.715162	4.19437	0.876296	2.40709	0.404502	2.41993	0.31928		18.5219
330	2000	992	18.4352	53.7939	0.473536	20.5696	1.34272	5.14978	0.430383	2.41315	5.95903	3.86784	0.521358	0.0542439	5.42439	7.0647		102.548	52.8592	0.923675	2.8083	2.46861	0.133077	2.11338	7.53608	153.433	354.468	0.214264	0.839738	0.251987	275.379	22.4251	110.913	7.25202	18.0257	2.65274	12.3661	3.76852	1.61906	4.13478	0.718301	4.2128	0.880155	2.41772	0.40629	2.43065	0.320695		18.4352
331	2000	991	18.3494	53.8474	0.470371	20.5581	1.33698	5.12005	0.432396	2.39269	5.93379	3.88023	0.523713	0.0544976	5.44976	7.02592		102.931	52.9094	0.928006	2.82127	2.48009	0.132263	2.12107	7.57121	154.088	353.901	0.215267	0.843553	0.253088	276.366	22.5242	111.425	7.28278	18.103	2.66421	12.4199	3.78501	1.62615	4.15288	0.721448	4.23128	0.884023	2.42837	0.408083	2.44139	0.322114		18.3494
332	2000	990	18.2645	53.9007	0.467231	20.5464	1.33127	5.09049	0.434407	2.37241	5.90865	3.89255	0.526067	0.0547511	5.47511	6.98737		103.313	52.9606	0.932333	2.83423	2.49157	0.131469	2.12874	7.60632	154.742	353.329	0.216269	0.847364	0.254188	277.355	22.6235	111.937	7.31352	18.1803	2.67569	12.4738	3.80152	1.63325	4.17103	0.724603	4.24981	0.887902	2.43905	0.40988	2.45216	0.323535		18.2645
333	2000	989	18.1804	53.9538	0.464114	20.5344	1.32559	5.0611	0.436416	2.35232	5.8836	3.90482	0.528417	0.0550043	5.50043	6.94903		103.695	53.0127	0.936657	2.84719	2.50303	0.130697	2.13639	7.6414	155.396	352.752	0.217271	0.851172	0.255286	278.346	22.7231	112.448	7.34422	18.2575	2.68716	12.5276	3.81806	1.64036	4.18921	0.727766	4.26839	0.891791	2.44976	0.411681	2.46294	0.324959		18.1804
334	2000	988	18.0971	54.0067	0.46102	20.5223	1.31993	5.03186	0.438424	2.3324	5.85865	3.91703	0.530765	0.0552574	5.52574	6.91089		104.076	53.0659	0.940978	2.86015	2.51449	0.129944	2.14402	7.67646	156.049	352.171	0.218272	0.854976	0.256382	279.339	22.823	112.959	7.37489	18.3346	2.69863	12.5815	3.83462	1.64749	4.20744	0.730937	4.28702	0.89569	2.46049	0.413486	2.47376	0.326387		18.0971
335	2000	987	18.0147	54.0593	0.457951	20.5099	1.3143	5.00279	0.440431	2.31267	5.8338	3.92918	0.53311	0.0555103	5.55103	6.87296		104.456	53.12	0.945296	2.8731	2.52594	0.12921	2.15162	7.71148	156.702	351.585	0.219272	0.858775	0.257477	280.333	22.9232	113.469	7.40552	18.4118	2.7101	12.6355	3.85121	1.65464	4.22571	0.734116	4.3057	0.8996	2.47125	0.415296	2.48459	0.327817		18.0147
336	2000	986	17.933	54.1118	0.454904	20.4973	1.30869	4.97387	0.442436	2.29312	5.80905	3.94127	0.535452	0.055763	5.5763	6.83521		104.834	53.175	0.94961	2.88605	2.53738	0.128496	2.15921	7.74648	157.354	350.994	0.220271	0.862571	0.258571	281.329	23.0236	113.98	7.43613	18.4888	2.72157	12.6894	3.86783	1.66179	4.24403	0.737304	4.32444	0.903521	2.48205	0.41711	2.49545	0.32925		17.933
337	2000	985	17.8522	54.1641	0.451882	20.4846	1.3031	4.94511	0.444439	2.27374	5.78439	3.95331	0.537793	0.0560155	5.60155	6.79767		105.213	53.231	0.953921	2.89899	2.54881	0.1278	2.16677	7.78145	158.005	350.399	0.22127	0.866363	0.259663	282.327	23.1243	114.489	7.46671	18.5658	2.73304	12.7434	3.88448	1.66897	4.26239	0.7405	4.34322	0.907453	2.49287	0.418929	2.50634	0.330686		17.8522
338	2000	984	17.7721	54.2162	0.448882	20.4716	1.29755	4.91651	0.446441	2.25453	5.75983	3.96529	0.54013	0.0562678	5.62678	6.76034		105.59	53.2879	0.95823	2.91193	2.56023	0.127123	2.17431	7.8164	158.656	349.801	0.222268	0.870152	0.260754	283.327	23.2253	114.999	7.49725	18.6428	2.74451	12.7974	3.90115	1.67615	4.2808	0.743705	4.36206	0.911397	2.50372	0.420753	2.51725	0.332125		17.7721
339	2000	983	17.6929	54.2681	0.445905	20.4584	1.29201	4.88806	0.448442	2.2355	5.73536	3.97721	0.542465	0.05652	5.652	6.72319		105.966	53.3457	0.962535	2.92487	2.57165	0.126463	2.18182	7.85132	159.307	349.197	0.223265	0.873937	0.261843	284.329	23.3267	115.509	7.52777	18.7198	2.75598	12.8515	3.91786	1.68336	4.29925	0.746919	4.38096	0.915351	2.5146	0.422582	2.52819	0.333567		17.6929
340	2000	982	17.6143	54.3198	0.442952	20.4451	1.2865	4.85976	0.450441	2.21664	5.71099	3.98907	0.544798	0.056772	5.6772	6.68623		106.342	53.4045	0.966837	2.93781	2.58306	0.12582	2.18932	7.88622	159.957	348.59	0.224262	0.877718	0.262931	285.332	23.4283	116.018	7.55825	18.7967	2.76745	12.9056	3.93459	1.69058	4.31775	0.750143	4.39991	0.919318	2.52551	0.424415	2.53916	0.335013		17.6143
341	2000	981	17.5365	54.3713	0.440021	20.4315	1.28102	4.83162	0.452439	2.19795	5.68672	4.00088	0.547128	0.0570238	5.70238	6.64949		106.716	53.4641	0.971137	2.95074	2.59445	0.125194	2.1968	7.92109	160.606	347.979	0.225258	0.881496	0.264017	286.338	23.5302	116.527	7.58871	18.8735	2.77892	12.9597	3.95136	1.69781	4.3363	0.753375	4.41891	0.923296	2.53645	0.426253	2.55015	0.336462		17.5365
342	2000	980	17.4595	54.4227	0.437113	20.4177	1.27556	4.80363	0.454436	2.17942	5.66254	4.01262	0.549456	0.0572754	5.72755	6.61293		107.09	53.5246	0.975433	2.96366	2.60585	0.124585	2.20425	7.95594	161.256	347.364	0.226254	0.88527	0.265102	287.345	23.6324	117.035	7.61914	18.9504	2.7904	13.0139	3.96815	1.70507	4.3549	0.756617	4.43798	0.927286	2.54743	0.428097	2.56118	0.337914		17.4595
343	2000	979	17.3832	54.4738	0.434228	20.4038	1.27012	4.77579	0.456431	2.16106	5.63845	4.02432	0.551781	0.0575269	5.75269	6.57655		107.464	53.586	0.979727	2.97659	2.61723	0.123991	2.21168	7.99077	161.904	346.746	0.227249	0.889041	0.266186	288.354	23.7349	117.544	7.64955	19.0271	2.80187	13.0681	3.98498	1.71234	4.37355	0.759868	4.4571	0.931288	2.55843	0.429945	2.57223	0.33937		17.3832
344	2000	978	17.3075	54.5248	0.431365	20.3896	1.26471	4.7481	0.458425	2.14286	5.61446	4.03595	0.554105	0.0577783	5.77783	6.54038		107.836	53.6483	0.984019	2.98951	2.62861	0.123413	2.2191	8.02557	162.552	346.124	0.228243	0.892808	0.267268	289.366	23.8378	118.052	7.67992	19.1039	2.81334	13.1223	4.00184	1.71963	4.39225	0.763129	4.47628	0.935302	2.56947	0.431799	2.5833	0.340829		17.3075
345	2000	977	17.2327	54.5755	0.428519	20.3754	1.25931	4.72055	0.460417	2.12482	5.59052	4.04753	0.556425	0.0580293	5.80293	6.50437		108.207	53.7111	0.988306	3.00243	2.63997	0.122848	2.22649	8.06034	163.2	345.5	0.229236	0.896571	0.268349	290.377	23.9407	118.559	7.71026	19.1806	2.82481	13.1766	4.0187	1.72691	4.41096	0.766392	4.49547	0.939319	2.58052	0.433653	2.59439	0.342289		17.2327
346	2000	976	17.1585	54.6261	0.425684	20.3611	1.25394	4.69315	0.462407	2.10693	5.56657	4.05905	0.558741	0.0582801	5.82801	6.46855		108.578	53.7741	0.992587	3.01532	2.65132	0.122291	2.23386	8.09507	163.847	344.878	0.230229	0.900329	0.269428	291.386	24.0434	119.066	7.74054	19.2571	2.83626	13.2307	4.03554	1.73419	4.42964	0.76965	4.51464	0.943329	2.59155	0.435505	2.60545	0.343746		17.1585
347	2000	975	17.0851	54.6765	0.422861	20.3468	1.24858	4.6659	0.464394	2.08918	5.54262	4.07052	0.561054	0.0585306	5.85306	6.43291		108.948	53.8374	0.996864	3.0282	2.66266	0.121743	2.24121	8.12975	164.492	344.257	0.231219	0.904081	0.270505	292.395	24.1461	119.572	7.77077	19.3335	2.84768	13.2847	4.05235	1.74146	4.44829	0.772903	4.53377	0.947335	2.60256	0.437354	2.6165	0.345202		17.0851
348	2000	974	17.0124	54.7267	0.42005	20.3325	1.24324	4.6388	0.466379	2.07159	5.51869	4.08194	0.563363	0.0587807	5.87807	6.39746		109.317	53.9009	1.00113	3.04106	2.67398	0.121204	2.24854	8.16439	165.137	343.637	0.232209	0.907827	0.27158	293.402	24.2485	120.078	7.80094	19.4098	2.85909	13.3387	4.06914	1.74872	4.46692	0.776152	4.55289	0.951335	2.61356	0.439201	2.62754	0.346655		17.0124
349	2000	973	16.9404	54.7766	0.417252	20.3181	1.23792	4.61184	0.468361	2.05413	5.49476	4.0933	0.565669	0.0590305	5.90305	6.36219		109.686	53.9646	1.0054	3.05391	2.68529	0.120675	2.25585	8.19898	165.781	343.018	0.233198	0.911568	0.272654	294.408	24.3509	120.583	7.83106	19.486	2.87049	13.3926	4.0859	1.75597	4.48553	0.779397	4.57198	0.95533	2.62455	0.441045	2.63857	0.348107		16.9404
350	2000	972	16.823	54.8644	0.414344	20.2939	1.23218	4.58301	0.47163	2.03109	5.45437	4.11174	0.569467	0.0594426	5.91439	6.32441		110.289	54.1105	1.01243	3.07508	2.70393	0.120015	2.26781	8.256	166.852	341.943	0.234827	0.91773	0.27442	296.112	24.5196	121.416	7.8806	19.6113	2.88924	13.4814	4.11353	1.76791	4.5162	0.784748	4.60346	0.961921	2.64267	0.44409	2.65676	0.350505		16.823
351	2000	971	16.6986	54.9592	0.411424	20.2679	1.22636	4.55392	0.475142	2.00726	5.411	4.13138	0.573545	0.0598852	5.92298	6.28627		110.935	54.2722	1.01998	3.09781	2.72393	0.119346	2.28061	8.31721	168.002	340.789	0.236576	0.924342	0.276314	297.946	24.7007	122.31	7.93372	19.7457	2.90936	13.5766	4.14318	1.78074	4.54913	0.790492	4.63726	0.968996	2.66213	0.447358	2.6763	0.353079		16.6986
352	2000	970	16.5765	55.0533	0.408515	20.2421	1.22056	4.52498	0.478643	1.98378	5.3679	4.1508	0.577607	0.0603264	5.93148	6.24832		111.578	54.4335	1.0275	3.12046	2.74387	0.118696	2.29334	8.3782	169.147	339.645	0.23832	0.930928	0.2782	299.773	24.8812	123.201	7.98662	19.8796	2.9294	13.6715	4.17272	1.79351	4.58193	0.796215	4.67093	0.976046	2.68152	0.450614	2.69577	0.355643		16.5765
353	2000	969	16.4565	55.1469	0.405619	20.2163	1.21477	4.49619	0.482132	1.96065	5.32507	4.17	0.581652	0.0607662	5.93989	6.21054		112.219	54.5945	1.035	3.14304	2.76374	0.118064	2.306	8.43899	170.289	338.512	0.240057	0.937492	0.280079	301.595	25.061	124.089	8.0393	20.0129	2.94936	13.766	4.20216	1.80625	4.61463	0.80192	4.7045	0.983073	2.70085	0.45386	2.71517	0.3582		16.4565
354	2000	968	16.3387	55.2399	0.402736	20.1907	1.209	4.46755	0.48561	1.93785	5.28251	4.18898	0.585683	0.0612045	5.94823	6.17294		112.856	54.7551	1.04247	3.16554	2.78354	0.11745	2.31859	8.49959	171.427	337.389	0.241789	0.944033	0.281951	303.41	25.2403	124.974	8.09177	20.1458	2.96925	13.8601	4.2315	1.81894	4.64722	0.807605	4.73795	0.990077	2.72011	0.457096	2.73452	0.360748		16.3387
355	2000	967	16.2228	55.3324	0.399865	20.1652	1.20324	4.43905	0.489077	1.91539	5.24022	4.20775	0.589698	0.0616416	5.95649	6.13552		113.49	54.9154	1.04992	3.18797	2.80329	0.116853	2.33111	8.56	172.562	336.275	0.243516	0.950552	0.283816	305.219	25.4191	125.856	8.14404	20.2781	2.98907	13.954	4.26074	1.83159	4.6797	0.813273	4.77131	0.997059	2.73932	0.460321	2.7538	0.363289		16.2228
356	2000	966	16.109	55.4243	0.397008	20.1398	1.1975	4.41071	0.492534	1.89325	5.19819	4.22631	0.593698	0.0620773	5.96467	6.09829		114.121	55.0755	1.05735	3.21034	2.82297	0.116272	2.34357	8.62023	173.692	335.171	0.245238	0.957049	0.285674	307.023	25.5972	126.736	8.19611	20.4099	3.00882	14.0475	4.28989	1.8442	4.71208	0.818923	4.80456	1.00402	2.75846	0.463537	2.77302	0.365821		16.109
357	2000	965	15.997	55.5156	0.394164	20.1145	1.19177	4.38251	0.495981	1.87144	5.15642	4.24465	0.597685	0.0625117	5.97278	6.06123		114.75	55.2352	1.06476	3.23263	2.8426	0.115708	2.35596	8.68028	174.819	334.077	0.246954	0.963526	0.287526	308.822	25.7749	127.613	8.24798	20.5413	3.0285	14.1408	4.31894	1.85677	4.74436	0.824556	4.83771	1.01096	2.77755	0.466743	2.79219	0.368347		15.997
358	2000	964	15.8869	55.6064	0.391335	20.0893	1.18605	4.35446	0.499418	1.84993	5.1149	4.26279	0.601657	0.0629449	5.9808	6.02434		115.375	55.3948	1.07215	3.25487	2.86217	0.115159	2.36829	8.74016	175.943	332.991	0.248666	0.969982	0.289371	310.615	25.952	128.487	8.29967	20.6722	3.04812	14.2337	4.34791	1.8693	4.77655	0.830173	4.87076	1.01788	2.79659	0.46994	2.8113	0.370865		15.8869
359	2000	963	15.7786	55.6967	0.38852	20.0642	1.18035	4.32656	0.502846	1.82874	5.07365	4.28072	0.605615	0.0633769	5.98876	5.98764		115.999	55.5541	1.07951	3.27704	2.88168	0.114625	2.38056	8.79988	177.064	331.914	0.250373	0.976419	0.29121	312.404	26.1287	129.36	8.35118	20.8027	3.06767	14.3263	4.37679	1.8818	4.80865	0.835773	4.90372	1.02478	2.81557	0.473128	2.83036	0.373376		15.7786
360	2000	962	15.6721	55.7864	0.385719	20.0392	1.17467	4.29882	0.506264	1.80784	5.03265	4.29845	0.60956	0.0638077	5.99663	5.95114		116.619	55.7132	1.08686	3.29915	2.90114	0.114106	2.39278	8.85943	178.181	330.845	0.252075	0.982837	0.293042	314.187	26.3049	130.229	8.40251	20.9328	3.08716	14.4187	4.40559	1.89426	4.84065	0.841359	4.93659	1.03166	2.8345	0.476308	2.84937	0.37588		15.6721
361	2000	961	15.5673	55.8756	0.382932	20.0143	1.169	4.27122	0.509673	1.78724	4.99189	4.31597	0.613492	0.0642374	6.00444	5.9148		117.238	55.8721	1.09419	3.3212	2.92055	0.113601	2.40493	8.91883	179.295	329.785	0.253774	0.989237	0.294869	315.966	26.4806	131.097	8.45367	21.0624	3.10659	14.5108	4.43431	1.90668	4.87257	0.846929	4.96937	1.03853	2.85338	0.479479	2.86833	0.378378		15.5673
362	2000	960	15.4641	55.9643	0.380161	19.9895	1.16335	4.24377	0.513074	1.76693	4.95138	4.33329	0.617412	0.064666	6.01217	5.87865		117.853	56.0308	1.1015	3.3432	2.93991	0.113109	2.41703	8.97808	180.407	328.733	0.255467	0.995619	0.29669	317.741	26.6558	131.962	8.50466	21.1916	3.12596	14.6026	4.46295	1.91908	4.90441	0.852485	5.00207	1.04537	2.87221	0.482642	2.88724	0.380869		15.4641
363	2000	959	15.3625	56.0525	0.377405	19.9648	1.15771	4.21647	0.516467	1.7469	4.91112	4.3504	0.621319	0.0650936	6.01983	5.84268		118.467	56.1894	1.10879	3.36514	2.95922	0.112631	2.42907	9.03719	181.515	327.688	0.257157	1.00198	0.298506	319.511	26.8306	132.825	8.55549	21.3204	3.14527	14.6941	4.49151	1.93144	4.93616	0.858027	5.03469	1.0522	2.891	0.485797	2.9061	0.383354		15.3625
364	2000	958	15.2625	56.1402	0.374663	19.9401	1.15209	4.18932	0.519851	1.72716	4.8711	4.36732	0.625214	0.0655202	6.02742	5.80689		119.078	56.3479	1.11606	3.38703	2.97849	0.112166	2.44106	9.09616	182.621	326.652	0.258843	1.00833	0.300316	321.278	27.0051	133.686	8.60616	21.4489	3.16454	14.7854	4.52	1.94377	4.96784	0.863555	5.06723	1.05902	2.90974	0.488945	2.92492	0.385834		15.2625
365	2000	957	15.164	56.2274	0.371937	19.9156	1.14649	4.16232	0.523228	1.70768	4.83132	4.38404	0.629098	0.0659458	6.03494	5.77129		119.687	56.5062	1.12332	3.40887	2.99771	0.111713	2.45299	9.15499	183.724	325.622	0.260525	1.01466	0.302121	323.04	27.1791	134.545	8.65667	21.577	3.18374	14.8765	4.54842	1.95607	4.99944	0.869071	5.09969	1.06581	2.92844	0.492086	2.9437	0.388308		15.164
366	2000	956	15.0669	56.314	0.369227	19.8912	1.1409	4.13547	0.526598	1.68847	4.79178	4.40057	0.63297	0.0663705	6.04239	5.73587		120.294	56.6645	1.13056	3.43066	3.01689	0.111273	2.46488	9.2137	184.825	324.6	0.262203	1.02098	0.303922	324.798	27.3527	135.402	8.70705	21.7047	3.2029	14.9673	4.57678	1.96834	5.03097	0.874574	5.13209	1.0726	2.94709	0.49522	2.96243	0.390776		15.0669
367	2000	955	14.9713	56.4002	0.366532	19.8669	1.13534	4.10877	0.529961	1.66953	4.75247	4.4169	0.636832	0.0667943	6.04978	5.70064		120.898	56.8227	1.13779	3.4524	3.03603	0.110845	2.47672	9.27228	185.923	323.585	0.263878	1.02728	0.305717	326.554	27.526	136.257	8.75727	21.8321	3.22201	15.058	4.60507	1.98059	5.06243	0.880065	5.16441	1.07937	2.96571	0.498347	2.98113	0.393239		14.9713
368	2000	954	14.8771	56.4859	0.363853	19.8426	1.12979	4.08222	0.533316	1.65085	4.7134	4.43303	0.640682	0.0672173	6.05709	5.66559		121.501	56.9809	1.145	3.4741	3.05513	0.110428	2.48851	9.33074	187.019	322.576	0.26555	1.03357	0.307507	328.305	27.6989	137.11	8.80737	21.9591	3.24107	15.1484	4.63329	1.99281	5.09383	0.885545	5.19667	1.08612	2.98429	0.501469	2.99979	0.395698		14.8771
369	2000	953	14.7843	56.5712	0.36119	19.8185	1.12425	4.05582	0.536666	1.63242	4.67455	4.44898	0.644523	0.0676394	6.06434	5.63072		122.102	57.139	1.1522	3.49576	3.07419	0.110022	2.50025	9.3891	188.113	321.575	0.267219	1.03984	0.309294	330.054	27.8714	137.962	8.85733	22.0859	3.26009	15.2386	4.66146	2.005	5.12516	0.891015	5.22886	1.09286	3.00284	0.504584	3.01841	0.398151		14.7843
370	2000	952	14.6927	56.6559	0.358543	19.7944	1.11874	4.02956	0.540009	1.61423	4.63593	4.46473	0.648354	0.0680608	6.07152	5.59603		122.701	57.2972	1.15939	3.51738	3.09321	0.109627	2.51194	9.44734	189.204	320.579	0.268884	1.0461	0.311075	331.799	28.0437	138.812	8.90716	22.2123	3.27906	15.3286	4.68957	2.01717	5.15643	0.896473	5.26099	1.09959	3.02135	0.507693	3.037	0.400601		14.6927
371	2000	951	14.6025	56.7402	0.355912	19.7704	1.11324	4.00345	0.543347	1.59629	4.59754	4.48029	0.652175	0.0684815	6.07863	5.56152		123.298	57.4553	1.16656	3.53896	3.11221	0.109243	2.52359	9.50549	190.294	319.59	0.270547	1.05235	0.312853	333.542	28.2156	139.661	8.95687	22.3384	3.29799	15.4184	4.71763	2.02932	5.18764	0.901922	5.29307	1.10631	3.03983	0.510797	3.05556	0.403045		14.6025
372	2000	950	14.5135	56.824	0.353297	19.7465	1.10776	3.97749	0.546679	1.5786	4.55937	4.49567	0.655987	0.0689014	6.08568	5.52719		123.893	57.6135	1.17373	3.5605	3.13117	0.10887	2.5352	9.56354	191.381	318.607	0.272206	1.05859	0.314627	335.282	28.3873	140.508	9.00646	22.4643	3.31688	15.508	4.74564	2.04144	5.2188	0.907362	5.32509	1.11301	3.05828	0.513896	3.07409	0.405486		14.5135
373	2000	949	14.4257	56.9074	0.350698	19.7227	1.1023	3.95167	0.550006	1.56113	4.52142	4.51086	0.65979	0.0693208	6.09267	5.49304		124.487	57.7717	1.18088	3.58201	3.1501	0.108506	2.54677	9.6215	192.467	317.63	0.273864	1.06481	0.316397	337.02	28.5587	141.354	9.05594	22.5899	3.33573	15.5975	4.77359	2.05355	5.24991	0.912792	5.35706	1.11971	3.0767	0.51699	3.09258	0.407923		14.4257
374	2000	948	14.3391	56.9903	0.348116	19.699	1.09685	3.926	0.553328	1.5439	4.48369	4.52586	0.663584	0.0697395	6.09959	5.45907		125.079	57.93	1.18802	3.60348	3.169	0.108152	2.5583	9.67937	193.552	316.659	0.275519	1.07103	0.318163	338.755	28.7298	142.199	9.10531	22.7152	3.35455	15.6868	4.8015	2.06563	5.28097	0.918215	5.38899	1.12639	3.09509	0.520079	3.11105	0.410357		14.3391
375	2000	947	14.2536	57.0728	0.345549	19.6754	1.09143	3.90048	0.556645	1.5269	4.44618	4.54067	0.667371	0.0701576	6.10644	5.4253		125.67	58.0884	1.19515	3.62493	3.18788	0.107808	2.56978	9.73716	194.634	315.693	0.277171	1.07723	0.319926	340.488	28.9007	143.042	9.15458	22.8403	3.37333	15.776	4.82937	2.0777	5.31198	0.923629	5.42086	1.13307	3.11345	0.523164	3.1295	0.412787		14.2536
376	2000	946	14.1693	57.1548	0.342999	19.6518	1.08602	3.8751	0.559958	1.51012	4.40888	4.5553	0.671149	0.0705752	6.11324	5.39169		126.259	58.2469	1.20227	3.64635	3.20673	0.107473	2.58123	9.79488	195.716	314.733	0.278822	1.08343	0.321686	342.22	29.0714	143.885	9.20375	22.9651	3.39208	15.865	4.8572	2.08975	5.34295	0.929037	5.4527	1.13974	3.13179	0.526245	3.14792	0.415214		14.1693
377	2000	945	14.086	57.2365	0.340466	19.6283	1.08063	3.84986	0.563268	1.49356	4.37179	4.56975	0.674919	0.0709922	6.11997	5.35825		126.846	58.4055	1.20939	3.66774	3.22555	0.107148	2.59264	9.85253	196.795	313.778	0.28047	1.08961	0.323442	343.949	29.2418	144.726	9.25283	23.0898	3.4108	15.9539	4.88499	2.10179	5.37388	0.934437	5.48449	1.1464	3.15011	0.529322	3.16632	0.417638		14.086
378	2000	944	14.0039	57.3176	0.337949	19.6049	1.07526	3.82477	0.566573	1.47721	4.33491	4.58401	0.678683	0.0714089	6.12664	5.325		127.432	58.5642	1.21649	3.6891	3.24436	0.106831	2.60402	9.91012	197.874	312.828	0.282117	1.09579	0.325196	345.677	29.4121	145.566	9.30182	23.2142	3.42949	16.0426	4.91274	2.1138	5.40478	0.939831	5.51625	1.15305	3.16841	0.532396	3.1847	0.42006		14.0039
379	2000	943	13.9227	57.3984	0.335448	19.5816	1.06991	3.79982	0.569875	1.46108	4.29824	4.59809	0.682439	0.0718251	6.13325	5.29193		128.017	58.7231	1.22359	3.71045	3.26314	0.106523	2.61536	9.96764	198.952	311.883	0.283762	1.10196	0.326947	347.404	29.5822	146.406	9.35072	23.3384	3.44815	16.1312	4.94046	2.12581	5.43564	0.94522	5.54798	1.15969	3.18669	0.535467	3.20306	0.422478		13.9227
380	2000	942	13.8426	57.4787	0.332964	19.5584	1.06457	3.77501	0.573175	1.44515	4.26178	4.612	0.686189	0.0722409	6.1398	5.25903		128.601	58.8822	1.23068	3.73177	3.28191	0.106224	2.62667	10.0251	200.028	310.943	0.285406	1.10812	0.328695	349.129	29.7521	147.245	9.39955	23.4625	3.46679	16.2198	4.96815	2.1378	5.46646	0.950602	5.57967	1.16633	3.20495	0.538535	3.2214	0.424895		13.8426
381	2000	941	13.7634	57.5587	0.330496	19.5352	1.05926	3.75035	0.576471	1.42943	4.22551	4.62572	0.689932	0.0726563	6.14628	5.22632		129.183	59.0415	1.23777	3.75307	3.30066	0.105932	2.63795	10.0825	201.103	310.007	0.287048	1.11428	0.33044	350.853	29.9219	148.082	9.4483	23.5863	3.48541	16.3082	4.99581	2.14978	5.49726	0.955981	5.61134	1.17296	3.2232	0.5416	3.23973	0.42731		13.7634
382	2000	940	13.6852	57.6382	0.328045	19.5121	1.05396	3.72583	0.579765	1.41391	4.18946	4.63926	0.69367	0.0730715	6.15271	5.19377		129.765	59.201	1.24485	3.77436	3.3194	0.105649	2.6492	10.1399	202.178	309.077	0.288689	1.12043	0.332184	352.576	30.0915	148.92	9.49698	23.71	3.504	16.3965	5.02344	2.16175	5.52803	0.961354	5.64298	1.17959	3.24144	0.544663	3.25804	0.429723		13.6852
383	2000	939	13.608	57.7173	0.32561	19.4891	1.04868	3.70144	0.583057	1.39859	4.1536	4.65263	0.697401	0.0734864	6.15908	5.16139		130.345	59.3607	1.25193	3.79563	3.33812	0.105374	2.66042	10.1973	203.252	308.15	0.290329	1.12657	0.333925	354.299	30.261	149.756	9.54559	23.8336	3.52257	16.4847	5.05105	2.17372	5.55879	0.966724	5.6746	1.18621	3.25966	0.547724	3.27634	0.432134		13.608
384	2000	938	13.5316	57.796	0.323191	19.4662	1.04342	3.6772	0.586347	1.38346	4.11794	4.66581	0.701127	0.073901	6.16539	5.1292		130.924	59.5207	1.259	3.81689	3.35683	0.105106	2.67161	10.2546	204.325	307.228	0.291968	1.13271	0.335664	356.021	30.4305	150.593	9.59415	23.957	3.54112	16.5729	5.07865	2.18567	5.58952	0.972091	5.7062	1.19283	3.27787	0.550783	3.29463	0.434544		13.5316
385	2000	937	13.4561	57.8744	0.32079	19.4433	1.03817	3.6531	0.589635	1.36852	4.08247	4.67882	0.704848	0.0743155	6.17164	5.09717		131.502	59.681	1.26607	3.83814	3.37554	0.104847	2.68277	10.3119	205.398	306.31	0.293607	1.13885	0.337402	357.743	30.5998	151.428	9.64264	24.0803	3.55966	16.661	5.10622	2.19761	5.62023	0.977454	5.73779	1.19945	3.29607	0.553841	3.31291	0.436953		13.4561
386	2000	936	13.3815	57.9523	0.318404	19.4205	1.03295	3.62913	0.592922	1.35377	4.0472	4.69165	0.708565	0.0747298	6.17783	5.06532		132.08	59.8415	1.27314	3.85938	3.39423	0.104594	2.6939	10.3691	206.47	305.396	0.295244	1.14498	0.339138	359.464	30.7691	152.264	9.69109	24.2035	3.57818	16.749	5.13378	2.20955	5.65093	0.982816	5.76936	1.20606	3.31426	0.556898	3.33119	0.439361		13.3815
387	2000	935	13.3078	58.0299	0.316035	19.3978	1.02774	3.6053	0.596208	1.33921	4.01213	4.70431	0.712276	0.0751439	6.18396	5.03363		132.656	60.0024	1.2802	3.88061	3.41292	0.104349	2.70501	10.4264	207.542	304.486	0.296882	1.15111	0.340872	361.185	30.9383	153.099	9.73949	24.3265	3.59669	16.837	5.16132	2.22149	5.68161	0.988175	5.80092	1.21267	3.33245	0.559953	3.34946	0.441768		13.3078
388	2000	934	13.2349	58.107	0.313683	19.3752	1.02256	3.58161	0.599494	1.32482	3.97724	4.71679	0.715984	0.075558	6.19004	5.00213		133.232	60.1635	1.28727	3.90184	3.4316	0.104111	2.7161	10.4836	208.613	303.58	0.298519	1.15723	0.342605	362.906	31.1075	153.934	9.78784	24.4495	3.61518	16.9249	5.18886	2.23342	5.71229	0.993533	5.83247	1.21928	3.35064	0.563008	3.36773	0.444175		13.2349
389	2000	933	13.1627	58.1839	0.311347	19.3526	1.01739	3.55806	0.602779	1.31062	3.94255	4.7291	0.719688	0.0759721	6.19606	4.97079		133.807	60.325	1.29433	3.92307	3.45028	0.103879	2.72716	10.5408	209.685	302.677	0.300155	1.16335	0.344337	364.628	31.2766	154.768	9.83616	24.5724	3.63367	17.0128	5.21639	2.24535	5.74296	0.99889	5.86402	1.22589	3.36882	0.566063	3.38599	0.446581		13.1627
390	2000	932	13.0914	58.2603	0.309027	19.3301	1.01224	3.53464	0.606064	1.29659	3.90804	4.74123	0.723388	0.0763861	6.20202	4.93962		134.382	60.4869	1.30139	3.94429	3.46896	0.103655	2.7382	10.598	210.756	301.778	0.301792	1.16947	0.346068	366.35	31.4458	155.603	9.88445	24.6952	3.65215	17.1006	5.24391	2.25727	5.77363	1.00425	5.89556	1.23249	3.387	0.569117	3.40425	0.448988		13.0914
391	2000	931	13.0208	58.3364	0.306724	19.3077	1.00711	3.51136	0.609349	1.28273	3.87372	4.75319	0.727084	0.0768002	6.20792	4.90862		134.955	60.6491	1.30845	3.96551	3.48764	0.103437	2.74922	10.6553	211.827	300.883	0.303429	1.17559	0.347798	368.073	31.6149	156.438	9.9327	24.818	3.67062	17.1884	5.27143	2.2692	5.80429	1.0096	5.92711	1.2391	3.40518	0.572172	3.42252	0.451394		13.0208
392	2000	930	12.951	58.4121	0.304437	19.2853	1.00199	3.48821	0.612635	1.26904	3.83958	4.76498	0.730778	0.0772143	6.21377	4.87778		135.529	60.8118	1.31552	3.98674	3.50632	0.103226	2.76023	10.7125	212.899	299.991	0.305066	1.18171	0.349527	369.796	31.7841	157.273	9.98093	24.9407	3.68908	17.2763	5.29895	2.28112	5.83496	1.01496	5.95866	1.24571	3.42337	0.575227	3.44078	0.453801		12.951
393	2000	929	12.8819	58.4874	0.302167	19.263	0.996896	3.4652	0.615921	1.25552	3.80563	4.77659	0.734468	0.0776285	6.21956	4.84712		136.101	60.9748	1.32258	4.00797	3.52501	0.103021	2.77121	10.7697	213.971	299.102	0.306703	1.18783	0.351256	371.52	31.9533	158.108	10.0291	25.0634	3.70755	17.3641	5.32647	2.29305	5.86564	1.02032	5.99022	1.25232	3.44156	0.578283	3.45906	0.456209		12.8819
394	2000	928	12.8135	58.5624	0.299912	19.2408	0.991819	3.44231	0.619209	1.24217	3.77186	4.78803	0.738157	0.0780428	6.2253	4.81661		136.674	61.1383	1.32965	4.0292	3.5437	0.102823	2.78217	10.827	215.043	298.216	0.308341	1.19395	0.352984	373.245	32.1225	158.943	10.0773	25.186	3.72601	17.4519	5.35399	2.30498	5.89632	1.02568	6.02178	1.25893	3.45975	0.58134	3.47733	0.458617		12.8135
395	2000	927	12.7458	58.6371	0.297674	19.2186	0.98676	3.41956	0.622497	1.22897	3.73827	4.7993	0.741843	0.0784573	6.23098	4.78627		137.246	61.3022	1.33672	4.05044	3.56239	0.102631	2.79312	10.8843	216.115	297.333	0.30998	1.20007	0.354712	374.972	32.2918	159.779	10.1255	25.3087	3.74447	17.5397	5.38152	2.31691	5.927	1.03104	6.05336	1.26555	3.47795	0.584397	3.49562	0.461027		12.7458
396	2000	926	12.6788	58.7114	0.295452	19.1965	0.981719	3.39695	0.625788	1.21594	3.70486	4.81039	0.745527	0.078872	6.2366	4.75611		137.817	61.4666	1.3438	4.0717	3.5811	0.102444	2.80405	10.9416	217.188	296.454	0.31162	1.20619	0.35644	376.7	32.4612	160.614	10.1737	25.4313	3.76293	17.6275	5.40906	2.32885	5.95771	1.0364	6.08495	1.27217	3.49616	0.587457	3.51391	0.463437		12.6788
397	2000	925	12.6124	58.7854	0.293247	19.1745	0.976697	3.37446	0.62908	1.20306	3.67162	4.82132	0.749209	0.079287	6.24217	4.7261		138.388	61.6314	1.35088	4.09296	3.59981	0.102264	2.81497	10.9989	218.262	295.577	0.31326	1.21232	0.358168	378.429	32.6307	161.451	10.2218	25.5539	3.78139	17.7154	5.43661	2.34079	5.98842	1.04177	6.11655	1.27879	3.51438	0.590518	3.53222	0.465849		12.6124
398	2000	924	12.5467	58.859	0.291057	19.1525	0.971693	3.3521	0.632375	1.19034	3.63857	4.83207	0.75289	0.0797022	6.24768	4.69625		138.959	61.7967	1.35796	4.11424	3.61854	0.102089	2.82587	11.0563	219.336	294.703	0.314902	1.21844	0.359896	380.16	32.8003	162.288	10.27	25.6766	3.79986	17.8033	5.46418	2.35274	6.01916	1.04714	6.14818	1.28541	3.53262	0.593581	3.55053	0.468262		12.5467
399	2000	923	12.4816	58.9323	0.288884	19.1306	0.966707	3.32987	0.635672	1.17777	3.60569	4.84265	0.756569	0.0801178	6.25314	4.66656		139.53	61.9626	1.36505	4.13553	3.63728	0.101921	2.83676	11.1138	220.411	293.832	0.316544	1.22457	0.361625	381.893	32.97	163.125	10.3182	25.7993	3.81834	17.8912	5.49176	2.3647	6.04991	1.05251	6.17983	1.29204	3.55086	0.596647	3.56886	0.470678		12.4816
400	2000	922	12.4172	59.0053	0.286726	19.1088	0.961739	3.30777	0.638971	1.16535	3.57298	4.85306	0.760248	0.0805336	6.25855	4.63704		140.101	62.1289	1.37214	4.15684	3.65603	0.101758	2.84764	11.1712	221.487	292.963	0.318189	1.23071	0.363354	383.628	33.1398	163.963	10.3663	25.922	3.83682	17.9792	5.51936	2.37666	6.08069	1.05789	6.21151	1.29868	3.56912	0.599715	3.58721	0.473095		12.4172
401	2000	921	12.3533	59.0779	0.284585	19.087	0.956789	3.2858	0.642274	1.15307	3.54044	4.8633	0.763926	0.0809499	6.2639	4.60768		140.671	62.2958	1.37924	4.17816	3.67481	0.1016	2.85851	11.2288	222.564	292.097	0.319834	1.23684	0.365083	385.365	33.3098	164.802	10.4145	26.0447	3.85531	18.0672	5.54697	2.38864	6.1115	1.06327	6.24321	1.30532	3.5874	0.602786	3.60557	0.475515		12.3533
402	2000	920	12.2901	59.1503	0.282459	19.0653	0.951857	3.26395	0.64558	1.14094	3.50808	4.87337	0.767604	0.0813666	6.2692	4.57847		141.242	62.4633	1.38635	4.19951	3.69359	0.101448	2.86937	11.2863	223.642	291.233	0.321481	1.24298	0.366813	387.104	33.48	165.642	10.4627	26.1675	3.87382	18.1553	5.57462	2.40062	6.14233	1.06866	6.27494	1.31197	3.60569	0.605859	3.62395	0.477937		12.2901
403	2000	919	12.2274	59.2223	0.28035	19.0437	0.946943	3.24223	0.648889	1.12896	3.47589	4.88327	0.771281	0.0817837	6.27444	4.54942		141.812	62.6313	1.39347	4.22088	3.7124	0.101301	2.88022	11.344	224.721	290.372	0.323131	1.24913	0.368545	388.846	33.6503	166.482	10.511	26.2904	3.89233	18.2434	5.60228	2.41262	6.17319	1.07405	6.3067	1.31863	3.62401	0.608936	3.64235	0.480361		12.2274
404	2000	918	12.1653	59.294	0.278256	19.0221	0.942048	3.22064	0.652203	1.11711	3.44387	4.893	0.774959	0.0822013	6.27963	4.52054		142.383	62.7999	1.40059	4.24227	3.73123	0.101159	2.89106	11.4017	225.802	289.513	0.324781	1.25528	0.370277	390.59	33.8208	167.324	10.5592	26.4134	3.91086	18.3317	5.62998	2.42462	6.20408	1.07945	6.3385	1.32529	3.64234	0.612017	3.66077	0.482788		12.1653
405	2000	917	12.1037	59.3653	0.276178	19.0006	0.93717	3.19917	0.65552	1.1054	3.41201	4.90256	0.778636	0.0826194	6.28476	4.4918		142.954	62.9691	1.40772	4.26369	3.75008	0.101023	2.90189	11.4595	226.883	288.656	0.326434	1.26144	0.37201	392.337	33.9916	168.166	10.6075	26.5364	3.9294	18.42	5.6577	2.43664	6.23501	1.08485	6.37034	1.33196	3.6607	0.615101	3.67921	0.485219		12.1037
406	2000	916	12.0427	59.4364	0.274116	18.9792	0.93231	3.17783	0.658841	1.09383	3.38033	4.91195	0.782315	0.083038	6.28984	4.46323		143.524	63.1389	1.41487	4.28513	3.76895	0.100891	2.91271	11.5173	227.967	287.801	0.328089	1.26761	0.373745	394.087	34.1625	169.01	10.6558	26.6596	3.94796	18.5084	5.68546	2.44868	6.26598	1.09026	6.40222	1.33864	3.67908	0.618189	3.69768	0.487652		12.0427
407	2000	915	11.9822	59.5072	0.27207	18.9578	0.927467	3.1566	0.662168	1.0824	3.34881	4.92117	0.785994	0.0834572	6.29487	4.4348		144.095	63.3094	1.42202	4.30661	3.78785	0.100765	2.92354	11.5752	229.051	286.949	0.329747	1.27378	0.375481	395.839	34.3337	169.854	10.7041	26.7828	3.96654	18.5969	5.71324	2.46073	6.29698	1.09568	6.43414	1.34533	3.69748	0.621282	3.71617	0.490089		11.9822
408	2000	914	11.9222	59.5777	0.270039	18.9365	0.922643	3.1355	0.665498	1.07109	3.31746	4.93022	0.789673	0.083877	6.29984	4.40653		144.667	63.4805	1.42918	4.32811	3.80678	0.100644	2.93435	11.6333	230.137	286.098	0.331407	1.27996	0.377219	397.595	34.5051	170.7	10.7525	26.9061	3.98514	18.6855	5.74107	2.4728	6.32803	1.10111	6.46611	1.35202	3.71591	0.624379	3.73469	0.49253		11.9222
409	2000	913	11.8627	59.6479	0.268023	18.9152	0.917836	3.11453	0.668834	1.05992	3.28627	4.9391	0.793354	0.0842975	6.30476	4.37842		145.238	63.6523	1.43635	4.34964	3.82573	0.100527	2.94516	11.6914	231.225	285.25	0.333069	1.28614	0.378959	399.354	34.6768	171.547	10.8009	27.0296	4.00376	18.7742	5.76893	2.48488	6.35913	1.10654	6.49812	1.35873	3.73437	0.627481	3.75324	0.494974		11.8627
410	2000	912	11.8038	59.7177	0.266024	18.894	0.913047	3.09367	0.672176	1.04888	3.25525	4.94781	0.797037	0.0847186	6.30963	4.35046		145.81	63.8247	1.44354	4.37121	3.84471	0.100415	2.95597	11.7495	232.315	284.403	0.334734	1.29234	0.3807	401.117	34.8487	172.395	10.8494	27.1532	4.0224	18.863	5.79683	2.49698	6.39027	1.11198	6.53018	1.36545	3.75286	0.630587	3.77182	0.497422		11.8038
411	2000	911	11.7453	59.7873	0.264039	18.8729	0.908276	3.07294	0.675523	1.03796	3.22438	4.95635	0.800721	0.0851405	6.31444	4.32265		146.382	63.9978	1.45073	4.39281	3.86373	0.100308	2.96678	11.8078	233.406	283.559	0.336402	1.29854	0.382443	402.883	35.0209	173.245	10.8979	27.277	4.04106	18.9519	5.82478	2.5091	6.42146	1.11743	6.5623	1.37218	3.77138	0.633699	3.79043	0.499874		11.7453
412	2000	910	11.6873	59.8566	0.262071	18.8518	0.903522	3.05232	0.678875	1.02717	3.19369	4.96472	0.804407	0.085563	6.3192	4.29499		146.955	64.1716	1.45794	4.41445	3.88277	0.100206	2.97758	11.8662	234.499	282.716	0.338072	1.30476	0.384188	404.653	35.1934	174.096	10.9465	27.4009	4.05975	19.041	5.85277	2.52124	6.4527	1.12289	6.59447	1.37892	3.78993	0.636816	3.80907	0.50233		11.6873
413	2000	909	11.6298	59.9257	0.260117	18.8308	0.898785	3.03182	0.682234	1.0165	3.16315	4.97291	0.808094	0.0859863	6.32391	4.26747		147.528	64.3462	1.46516	4.43613	3.90185	0.100108	2.98839	11.9247	235.595	281.875	0.339746	1.31098	0.385936	406.426	35.3662	174.949	10.9951	27.5249	4.07847	19.1302	5.8808	2.5334	6.48399	1.12836	6.62669	1.38567	3.80852	0.639939	3.82774	0.504791		11.6298
414	2000	908	11.5727	59.9944	0.258179	18.8099	0.894066	3.01145	0.685599	1.00595	3.13278	4.98094	0.811784	0.0864105	6.32856	4.24012		148.102	64.5214	1.4724	4.45785	3.92096	0.100014	2.99919	11.9833	236.692	281.035	0.341423	1.31721	0.387686	408.204	35.5394	175.803	11.0438	27.6492	4.09721	19.2195	5.90888	2.54559	6.51535	1.13384	6.65898	1.39244	3.82714	0.643067	3.84645	0.507257		11.5727
415	2000	907	11.516	60.0628	0.256256	18.789	0.889364	2.99118	0.688971	0.99552	3.10256	4.9888	0.815477	0.0868354	6.33316	4.2129		148.676	64.6974	1.47965	4.4796	3.94011	0.0999252	3.00999	12.042	237.791	280.198	0.343103	1.32346	0.389438	409.985	35.7128	176.659	11.0925	27.7736	4.11598	19.309	5.93702	2.55779	6.54675	1.13933	6.69133	1.39921	3.84579	0.646202	3.8652	0.509727		11.516
416	2000	906	11.4598	60.131	0.254348	18.7682	0.88468	2.97104	0.692349	0.985209	3.07251	4.99649	0.819172	0.0872612	6.33771	4.18584		149.251	64.8742	1.48691	4.5014	3.9593	0.0998406	3.0208	12.1009	238.893	279.362	0.344786	1.32971	0.391193	411.771	35.8866	177.517	11.1414	27.8982	4.13478	19.3987	5.9652	2.57002	6.57823	1.14483	6.72374	1.40601	3.86448	0.649343	3.88398	0.512202		11.4598
417	2000	905	11.4041	60.1989	0.252455	18.7474	0.880013	2.95101	0.695734	0.975014	3.04262	5.00401	0.822869	0.0876878	6.34221	4.15891		149.826	65.0517	1.49419	4.52325	3.97853	0.0997603	3.03161	12.1598	239.997	278.527	0.346473	1.33598	0.392951	413.561	36.0608	178.376	11.1902	28.023	4.15362	19.4885	5.99344	2.58227	6.60976	1.15034	6.75621	1.41281	3.88321	0.65249	3.9028	0.514683		11.4041
418	2000	904	11.3488	60.2666	0.250577	18.7268	0.875363	2.9311	0.699127	0.964934	3.01288	5.01136	0.82657	0.0881154	6.34665	4.13214		150.402	65.23	1.50148	4.54514	3.99779	0.0996842	3.04242	12.2189	241.103	277.694	0.348163	1.34226	0.394711	415.355	36.2353	179.237	11.2392	28.1479	4.17248	19.5784	6.02173	2.59454	6.64136	1.15587	6.78876	1.41963	3.90198	0.655645	3.92166	0.517168		11.3488
419	2000	903	11.2938	60.3339	0.248715	18.7061	0.87073	2.9113	0.702527	0.954967	2.9833	5.01853	0.830273	0.0885439	6.35104	4.10551		150.979	65.4091	1.50879	4.56708	4.0171	0.0996123	3.05323	12.2781	242.212	276.863	0.349858	1.34855	0.396474	417.154	36.4102	180.1	11.2882	28.2731	4.19138	19.6686	6.05009	2.60684	6.67302	1.1614	6.82137	1.42647	3.92079	0.658806	3.94057	0.51966		11.2938
420	2000	902	11.2393	60.401	0.246867	18.6856	0.866115	2.89162	0.705934	0.945111	2.95389	5.02554	0.83398	0.0889734	6.35538	4.07903		151.557	65.5891	1.51612	4.58906	4.03645	0.0995446	3.06405	12.3374	243.323	276.033	0.351556	1.35485	0.39824	418.958	36.5855	180.965	11.3374	28.3986	4.21032	19.7589	6.0785	2.61917	6.70475	1.16695	6.85406	1.43332	3.93965	0.661974	3.95951	0.522156		11.2393
421	2000	901	11.1852	60.4679	0.245034	18.6651	0.861516	2.87205	0.70935	0.935365	2.92462	5.03237	0.83769	0.0894039	6.35966	4.05268		152.135	65.7698	1.52347	4.6111	4.05584	0.099481	3.07487	12.3969	244.437	275.204	0.353257	1.36116	0.40001	420.766	36.7612	181.832	11.3865	28.5242	4.22929	19.8494	6.10697	2.63153	6.73656	1.17251	6.88682	1.44018	3.95854	0.665149	3.9785	0.524659		11.1852
422	2000	900	11.1315	60.5344	0.243216	18.6446	0.856934	2.85259	0.712773	0.925727	2.89552	5.03904	0.841404	0.0898354	6.3639	4.02648		152.714	65.9513	1.53083	4.63318	4.07528	0.0994214	3.0857	12.4565	245.554	274.377	0.354963	1.36749	0.401783	422.579	36.9373	182.701	11.4358	28.6501	4.2483	19.9401	6.13551	2.64391	6.76843	1.17808	6.91966	1.44706	3.97748	0.668332	3.99754	0.527168		11.1315
[truncated: 55 more columns]

## Sheet: Mixing Model
Liquid-Plagioclase mixes
				SiO2	TiO2	Al2O3	Fe2O3	Cr2O3	FeO	MnO	MgO	NiO	CoO	CaO	Na2O	K2O	P2O5	H2O	Fe2O3*		Ba	Co	Cs	Hf	Nb	Ni	Pb	Rb	Sc	Sr	Ta	Th	U	V	Y	Zr	La	Ce	Pr	Nd	Sm	Eu	Gd	Tb	Dy	Ho	Er	Tm	Yb
Liquid index		75		47.6253	0.357657	17.1133	1.16672	0	4.95487	0	11.7499	0	0	14.6696	1.15967	0.108381	0.0108381	1.08381	6.67213		26.6142	58.2	0.184674	0.651792	0.503844	77.3476	0.543155	1.52082	34.8406	319.373	0.0434348	0.173811	0.0543159	132.955	7.4925	23.8792	1.73805	4.45373	0.684336	3.36731	1.14051	0.510503	1.34687	0.238961	1.41202	0.293267	0.792915	0.130342	0.760329
Other liquid index		161		47.6338	0.533148	19.8408	1.49118	0	5.81748	0.167965	7.9991	0	0	12.7464	1.73517	0.181578	0.0183506	1.83506	7.95505		42.1128	51.0933	0.312591	1.03472	0.846343	4.54897	0.865172	2.56709	56.4389	375.514	0.0730784	0.291756	0.0903065	154.443	10.6217	39.1924	2.78187	7.0357	1.06268	5.12389	1.67148	0.737755	1.92536	0.339262	2.00022	0.416364	1.13196	0.187491	1.10315
Plagioclase temp		432		52.9269	0	30.077	0	0	0	0	0	0	0	12.464	4.46035	0.0717439	0	0	0		125	1.60168	0.0297855	0.0337532	0.0320654	0	1.00503	0.293151	2.32887	609.714	0	0.055102	0.0364201	0	1.03501	1.38514	2.45377	4.68307	0.593886	2.32007	0.596216	0.561075	0.410651	0.0646707	0.337331	0.0603775	0.13647	0.0185066	0.087168
		0		52.9269	0	30.077	0	0	0	0	0	0	0	12.464	4.46035	0.0717439	0	0	0		125	1.60168	0.0297855	0.0337532	0.0320654	0	1.00503	0.293151	2.32887	609.714	0	0.055102	0.0364201	0	1.03501	1.38514	2.45377	4.68307	0.593886	2.32007	0.596216	0.561075	0.410651	0.0646707	0.337331	0.0603775	0.13647	0.0185066	0.087168
		0.05		52.6618	0.0178829	29.4288	0.058336	0	0.247744	0	0.587495	0	0	12.5743	4.29532	0.0735758	0.000541905	0.0541905	0.333607		120.081	4.4316	0.0375299	0.0646551	0.0556543	3.86738	0.981936	0.354534	3.95446	595.197	0.00217174	0.0610374	0.0373149	6.64775	1.35788	2.50984	2.41798	4.6716	0.598409	2.37243	0.623431	0.558546	0.457462	0.0733852	0.391065	0.072022	0.169292	0.0240984	0.120826
		0.1		52.3967	0.0357657	28.7806	0.116672	0	0.495487	0	1.17499	0	0	12.6846	4.13028	0.0754076	0.00108381	0.108381	0.667213		115.161	7.26151	0.0452744	0.0955571	0.0792433	7.73476	0.958843	0.415918	5.58004	580.68	0.00434348	0.0669729	0.0382097	13.2955	1.68076	3.63455	2.3822	4.66014	0.602931	2.42479	0.650645	0.556018	0.504273	0.0820997	0.4448	0.0836665	0.202115	0.0296901	0.154484
		0.15		52.1317	0.0536486	28.1324	0.175008	0	0.743231	0	1.76249	0	0	12.7948	3.96525	0.0772395	0.00162572	0.162572	1.00082		110.242	10.0914	0.0530188	0.126459	0.102832	11.6021	0.935749	0.477301	7.20563	566.163	0.00651522	0.0729083	0.0391045	19.9433	2.00363	4.75925	2.34641	4.64867	0.607454	2.47716	0.67786	0.553489	0.551084	0.0908142	0.498534	0.0953109	0.234937	0.0352819	0.188142
		0.2		51.8666	0.0715314	27.4843	0.233344	0	0.990974	0	2.34998	0	0	12.9051	3.80021	0.0790713	0.00216762	0.216762	1.33443		105.323	12.9213	0.0607632	0.157361	0.126421	15.4695	0.912655	0.538685	8.83122	551.646	0.00868696	0.0788438	0.0399993	26.591	2.32651	5.88395	2.31063	4.6372	0.611976	2.52952	0.705075	0.550961	0.597895	0.0995288	0.552269	0.106955	0.267759	0.0408737	0.2218
		0.25		51.6015	0.0894143	26.8361	0.29168	0	1.23872	0	2.93748	0	0	13.0154	3.63518	0.0809032	0.00270952	0.270952	1.66803		100.404	15.7513	0.0685076	0.188263	0.15001	19.3369	0.889561	0.600068	10.4568	537.129	0.0108587	0.0847793	0.0408941	33.2388	2.64938	7.00866	2.27484	4.62573	0.616499	2.58188	0.732289	0.548432	0.644706	0.108243	0.606003	0.1186	0.300581	0.0464655	0.255458
		0.3		51.3364	0.107297	26.1879	0.350016	0	1.48646	0	3.52497	0	0	13.1257	3.47015	0.082735	0.00325143	0.325143	2.00164		95.4843	18.5812	0.0762521	0.219165	0.173599	23.2043	0.866468	0.661452	12.0824	522.612	0.0130304	0.0907147	0.0417888	39.8865	2.97226	8.13336	2.23905	4.61427	0.621021	2.63424	0.759504	0.545903	0.691517	0.116958	0.659738	0.130244	0.333403	0.0520572	0.289116
		0.35		51.0713	0.12518	25.5397	0.408352	0	1.7342	0	4.11247	0	0	13.236	3.30511	0.0845669	0.00379333	0.379333	2.33525		90.565	21.4111	0.0839965	0.250067	0.197188	27.0717	0.843374	0.722835	13.708	508.095	0.0152022	0.0966501	0.0426836	46.5343	3.29513	9.25806	2.20327	4.6028	0.625544	2.6866	0.786719	0.543375	0.738328	0.125672	0.713472	0.141889	0.366226	0.057649	0.322774
		0.4		50.8063	0.143063	24.8915	0.466688	0	1.98195	0	4.69996	0	0	13.3462	3.14008	0.0863987	0.00433524	0.433524	2.66885		85.6457	24.241	0.0917409	0.280969	0.220777	30.939	0.82028	0.784219	15.3336	493.578	0.0173739	0.102586	0.0435784	53.182	3.61801	10.3828	2.16748	4.59133	0.630066	2.73897	0.813934	0.540846	0.785139	0.134387	0.767207	0.153533	0.399048	0.0632408	0.356432
		0.45		50.5412	0.160946	24.2433	0.525024	0	2.22969	0	5.28745	0	0	13.4565	2.97504	0.0882306	0.00487714	0.487714	3.00246		80.7264	27.0709	0.0994853	0.311871	0.244366	34.8064	0.797186	0.845602	16.9591	479.061	0.0195457	0.108521	0.0444732	59.8297	3.94088	11.5075	2.1317	4.57987	0.634588	2.79133	0.841148	0.538318	0.83195	0.143101	0.820941	0.165178	0.43187	0.0688325	0.39009
		0.5		50.2761	0.178828	23.5951	0.58336	0	2.47743	0	5.87495	0	0	13.5668	2.81001	0.0900624	0.00541905	0.541905	3.33607		75.8071	29.9008	0.10723	0.342773	0.267955	38.6738	0.774093	0.906985	18.5847	464.543	0.0217174	0.114456	0.045368	66.4775	4.26375	12.6322	2.09591	4.5684	0.639111	2.84369	0.868363	0.535789	0.87876	0.151816	0.874675	0.176822	0.464692	0.0744243	0.423748
		0.55		50.011	0.196711	22.947	0.641696	0	2.72518	0	6.46244	0	0	13.6771	2.64498	0.0918943	0.00596095	0.596095	3.66967		70.8878	32.7308	0.114974	0.373675	0.291544	42.5412	0.750999	0.968369	20.2103	450.026	0.0238891	0.120392	0.0462628	73.1252	4.58663	13.7569	2.06012	4.55693	0.643633	2.89605	0.895578	0.53326	0.925571	0.16053	0.92841	0.188467	0.497515	0.0800161	0.457407
		0.6		49.7459	0.214594	22.2988	0.700032	0	2.97292	0	7.04994	0	0	13.7874	2.47994	0.0937262	0.00650286	0.650286	4.00328		65.9685	35.5607	0.122719	0.404576	0.315133	46.4086	0.727905	1.02975	21.8359	435.509	0.0260609	0.126327	0.0471576	79.773	4.9095	14.8816	2.02434	4.54547	0.648156	2.94841	0.922792	0.530732	0.972382	0.169245	0.982144	0.200111	0.530337	0.0856078	0.491065
		0.65		49.4809	0.232477	21.6506	0.758368	0	3.22067	0	7.63743	0	0	13.8976	2.31491	0.095558	0.00704476	0.704476	4.33689		61.0492	38.3906	0.130463	0.435478	0.338721	50.2759	0.704811	1.09114	23.4615	420.992	0.0282326	0.132263	0.0480524	86.4208	5.23238	16.0063	1.98855	4.534	0.652679	3.00078	0.950007	0.528203	1.01919	0.177959	1.03588	0.211756	0.563159	0.0911996	0.524723
		0.7		49.2158	0.25036	21.0024	0.816704	0	3.46841	0	8.22493	0	0	14.0079	2.14987	0.0973899	0.00758667	0.758667	4.67049		56.1299	41.2205	0.138207	0.46638	0.36231	54.1433	0.681717	1.15252	25.0871	406.475	0.0304044	0.138198	0.0489472	93.0685	5.55525	17.131	1.95277	4.52253	0.657201	3.05314	0.977222	0.525675	1.066	0.186674	1.08961	0.2234	0.595982	0.0967914	0.558381
		0.75		48.9507	0.268243	20.3542	0.87504	0	3.71615	0	8.81243	0	0	14.1182	1.98484	0.0992217	0.00812858	0.812858	5.0041		51.2106	44.0504	0.145952	0.497282	0.385899	58.0107	0.658624	1.2139	26.7127	391.958	0.0325761	0.144134	0.049842	99.7163	5.87813	18.2557	1.91698	4.51107	0.661724	3.1055	1.00444	0.523146	1.11282	0.195388	1.14335	0.235045	0.628804	0.102383	0.592039
		0.8		48.6856	0.286126	19.706	0.933376	0	3.9639	0	9.39992	0	0	14.2285	1.81981	0.101054	0.00867048	0.867048	5.3377		46.2914	46.8803	0.153696	0.528184	0.409488	61.8781	0.63553	1.27529	28.3383	377.441	0.0347478	0.150069	0.0507367	106.364	6.201	19.3804	1.88119	4.4996	0.666246	3.15786	1.03165	0.520617	1.15963	0.204103	1.19708	0.246689	0.661626	0.107975	0.625697
		0.85		48.4205	0.304008	19.0579	0.991712	0	4.21164	0	9.98742	0	0	14.3388	1.65477	0.102885	0.00921239	0.921239	5.67131		41.3721	49.7103	0.161441	0.559086	0.433077	65.7455	0.612436	1.33667	29.9638	362.924	0.0369196	0.156005	0.0516315	113.012	6.52388	20.5051	1.84541	4.48813	0.670768	3.21022	1.05887	0.518089	1.20644	0.212817	1.25082	0.258334	0.694448	0.113567	0.659355
		0.9		48.1555	0.321891	18.4097	1.05005	0	4.45938	0	10.5749	0	0	14.449	1.48974	0.104717	0.00975429	0.975429	6.00492		36.4528	52.5402	0.169185	0.589988	0.456666	69.6128	0.589342	1.39805	31.5894	348.407	0.0390913	0.16194	0.0525263	119.66	6.84675	21.6298	1.80962	4.47666	0.675291	3.26259	1.08608	0.51556	1.25325	0.221532	1.30455	0.269978	0.727271	0.119158	0.693013
		0.95		47.8904	0.339774	17.7615	1.10838	0	4.70713	0	11.1624	0	0	14.5593	1.3247	0.106549	0.0102962	1.02962	6.33852		31.5335	55.3701	0.17693	0.62089	0.480255	73.4802	0.566249	1.45944	33.215	333.89	0.0412631	0.167876	0.0534211	126.307	7.16963	22.7545	1.77384	4.4652	0.679814	3.31495	1.1133	0.513032	1.30006	0.230246	1.35829	0.281623	0.760093	0.12475	0.726671
		1		47.6253	0.357657	17.1133	1.16672	0	4.95487	0	11.7499	0	0	14.6696	1.15967	0.108381	0.0108381	1.08381	6.67213		26.6142	58.2	0.184674	0.651792	0.503844	77.3476	0.543155	1.52082	34.8406	319.373	0.0434348	0.173811	0.0543159	132.955	7.4925	23.8792	1.73805	4.45373	0.684336	3.36731	1.14051	0.510503	1.34687	0.238961	1.41202	0.293267	0.792915	0.130342	0.760329
		0		52.9269	0	30.077	0	0	0	0	0	0	0	12.464	4.46035	0.0717439	0	0	0	0	125	1.60168	0.0297855	0.0337532	0.0320654	0	1.00503	0.293151	2.32887	609.714	0	0.055102	0.0364201	0	1.03501	1.38514	2.45377	4.68307	0.593886	2.32007	0.596216	0.561075	0.410651	0.0646707	0.337331	0.0603775	0.13647	0.0185066	0.087168
		0.05		52.6622	0.0266574	29.5652	0.074559	0	0.290874	0.00839825	0.399955	0	0	12.4781	4.32409	0.0772356	0.00091753	0.091753	0.397752	0	120.856	4.07626	0.0439258	0.0838015	0.0727793	0.227448	0.998037	0.406848	5.03437	598.004	0.00365392	0.0669347	0.0391144	7.72215	1.51434	3.2755	2.47017	4.8007	0.617326	2.46026	0.649979	0.569909	0.486386	0.0784003	0.420475	0.0781768	0.186245	0.0269558	0.137967
		0.1		52.3976	0.0533148	29.0534	0.149118	0	0.581748	0.0167965	0.79991	0	0	12.4922	4.18783	0.0827273	0.00183506	0.183506	0.795505	0	116.711	6.55084	0.0580661	0.13385	0.113493	0.454897	0.991044	0.520545	7.73987	586.294	0.00730784	0.0787674	0.0418087	15.4443	1.99368	5.16587	2.48658	4.91833	0.640765	2.60045	0.703742	0.578743	0.562122	0.0921298	0.50362	0.0959762	0.236019	0.035405	0.188766
		0.15		52.1329	0.0799722	28.5416	0.223677	0	0.872622	0.0251948	1.19987	0	0	12.5064	4.05157	0.088219	0.00275259	0.275259	1.19326	0	112.567	9.02542	0.0722063	0.183898	0.154207	0.682346	0.984051	0.634242	10.4454	574.584	0.0109618	0.0906001	0.0445031	23.1665	2.47301	7.05623	2.50298	5.03596	0.664205	2.74064	0.757506	0.587577	0.637857	0.105859	0.586764	0.113775	0.285794	0.0438543	0.239565
		0.2		51.8683	0.10663	28.0298	0.298236	0	1.1635	0.033593	1.59982	0	0	12.5205	3.91531	0.0937107	0.00367012	0.367012	1.59101	0	108.423	11.5	0.0863466	0.233947	0.194921	0.909794	0.977058	0.747939	13.1509	562.874	0.0146157	0.102433	0.0471974	30.8886	2.95235	8.94659	2.51939	5.1536	0.687645	2.88083	0.811269	0.596411	0.713593	0.119589	0.669909	0.131575	0.335568	0.0523035	0.290364
		0.25		51.6036	0.133287	27.518	0.372795	0	1.45437	0.0419913	1.99978	0	0	12.5346	3.77906	0.0992024	0.00458765	0.458765	1.98876	0	104.278	13.9746	0.100487	0.283995	0.235635	1.13724	0.970066	0.861636	15.8564	551.164	0.0182696	0.114266	0.0498917	38.6108	3.43168	10.837	2.53579	5.27123	0.711085	3.02102	0.865032	0.605245	0.789328	0.133319	0.753053	0.149374	0.385343	0.0607527	0.341164
		0.3		51.339	0.159944	27.0061	0.447354	0	1.74524	0.0503895	2.39973	0	0	12.5487	3.6428	0.104694	0.00550518	0.550518	2.38651	0	100.134	16.4492	0.114627	0.334043	0.276349	1.36469	0.963073	0.975333	18.5619	539.454	0.0219235	0.126098	0.052586	46.3329	3.91102	12.7273	2.5522	5.38886	0.734524	3.16122	0.918795	0.614079	0.865064	0.147048	0.836198	0.167173	0.435117	0.0692019	0.391963
		0.35		51.0743	0.186602	26.4943	0.521913	0	2.03612	0.0587877	2.79968	0	0	12.5628	3.50654	0.110186	0.00642271	0.642271	2.78427	0	95.9895	18.9237	0.128767	0.384092	0.317063	1.59214	0.95608	1.08903	21.2674	527.744	0.0255774	0.137931	0.0552803	54.0551	4.39035	14.6177	2.56861	5.50649	0.757964	3.30141	0.972558	0.622913	0.940799	0.160778	0.919342	0.184973	0.484891	0.0776511	0.442762
		0.4		50.8097	0.213259	25.9825	0.596472	0	2.32699	0.067186	3.19964	0	0	12.577	3.37028	0.115678	0.00734024	0.734024	3.18202	0	91.8451	21.3983	0.142908	0.43414	0.357776	1.81959	0.949087	1.20273	23.9729	516.034	0.0292314	0.149764	0.0579747	61.7772	4.86969	16.508	2.58501	5.62412	0.781404	3.4416	1.02632	0.631747	1.01653	0.174507	1.00249	0.202772	0.534666	0.0861004	0.493561
		0.45		50.545	0.239917	25.4707	0.671031	0	2.61787	0.0755842	3.59959	0	0	12.5911	3.23402	0.121169	0.00825777	0.825777	3.57977	0	87.7008	23.8729	0.157048	0.484188	0.39849	2.04704	0.942094	1.31642	26.6784	504.324	0.0328853	0.161596	0.060669	69.4993	5.34902	18.3984	2.60142	5.74175	0.804843	3.58179	1.08008	0.640581	1.09227	0.188237	1.08563	0.220571	0.584441	0.0945496	0.54436
		0.5		50.2803	0.266574	24.9589	0.74559	0	2.90874	0.0839825	3.99955	0	0	12.6052	3.09776	0.126661	0.0091753	0.91753	3.97752	0	83.5564	26.3475	0.171188	0.534237	0.439204	2.27448	0.935101	1.43012	29.3839	492.614	0.0365392	0.173429	0.0633633	77.2215	5.82835	20.2888	2.61782	5.85938	0.828283	3.72198	1.13385	0.649415	1.16801	0.201966	1.16878	0.238371	0.634215	0.102999	0.595159
		0.55		50.0157	0.293231	24.4471	0.820149	0	3.19961	0.0923807	4.3995	0	0	12.6193	2.9615	0.132153	0.0100928	1.00928	4.37528	0	79.412	28.8221	0.185329	0.584285	0.479918	2.50193	0.928108	1.54382	32.0894	480.904	0.0401931	0.185262	0.0660576	84.9436	6.30769	22.1791	2.63422	5.97702	0.851723	3.86217	1.18761	0.658249	1.24374	0.215696	1.25192	0.25617	0.68399	0.111448	0.645958
		0.6		49.751	0.319889	23.9353	0.894708	0	3.49049	0.100779	4.79946	0	0	12.6334	2.82524	0.137644	0.0110104	1.10104	4.77303	0	75.2677	31.2967	0.199469	0.634333	0.520632	2.72938	0.921115	1.65751	34.7949	469.194	0.043847	0.197094	0.0687519	92.6658	6.78702	24.0695	2.65063	6.09465	0.875162	4.00236	1.24137	0.667083	1.31948	0.229425	1.33506	0.273969	0.733764	0.119897	0.696757
		0.65		49.4864	0.346546	23.4235	0.969267	0	3.78136	0.109177	5.19942	0	0	12.6476	2.68898	0.143136	0.0119279	1.19279	5.17078	0	71.1233	33.7712	0.213609	0.684382	0.561346	2.95683	0.914122	1.77121	37.5004	457.484	0.047501	0.208927	0.0714463	100.388	7.26636	25.9599	2.66704	6.21228	0.898602	4.14255	1.29514	0.675917	1.39521	0.243155	1.41821	0.291769	0.783539	0.128346	0.747556
		0.7		49.2217	0.373204	22.9117	1.04383	0	4.07224	0.117576	5.59937	0	0	12.6617	2.55272	0.148628	0.0128454	1.28454	5.56853	0	66.979	36.2458	0.227749	0.73443	0.60206	3.18428	0.907129	1.88491	40.2059	445.774	0.0511549	0.22076	0.0741406	108.11	7.74569	27.8502	2.68344	6.32991	0.922042	4.28274	1.3489	0.684751	1.47095	0.256885	1.50135	0.309568	0.833313	0.136796	0.798355
		0.75		48.9571	0.399861	22.3999	1.11839	0	4.36311	0.125974	5.99933	0	0	12.6758	2.41646	0.154119	0.013763	1.3763	5.96629	0	62.8346	38.7204	0.24189	0.784478	0.642774	3.41173	0.900137	1.99861	42.9114	434.064	0.0548088	0.232593	0.0768349	115.832	8.22503	29.7406	2.69984	6.44754	0.945482	4.42294	1.40266	0.693585	1.54668	0.270614	1.5845	0.327367	0.883088	0.145245	0.849155
		0.8		48.6924	0.426518	21.888	1.19294	0	4.65398	0.134372	6.39928	0	0	12.6899	2.28021	0.159611	0.0146805	1.46805	6.36404	0	58.6902	41.195	0.25603	0.834527	0.683487	3.63918	0.893144	2.1123	45.6169	422.354	0.0584627	0.244425	0.0795292	123.554	8.70436	31.6309	2.71625	6.56517	0.968921	4.56313	1.45643	0.702419	1.62242	0.284344	1.66764	0.345167	0.932862	0.153694	0.899954
		0.85		48.4278	0.453176	21.3762	1.2675	0	4.94486	0.14277	6.79924	0	0	12.704	2.14395	0.165103	0.015598	1.5598	6.76179	0	54.5459	43.6696	0.27017	0.884575	0.724201	3.86662	0.886151	2.226	48.3224	410.644	0.0621166	0.256258	0.0822235	131.277	9.1837	33.5213	2.73266	6.68281	0.992361	4.70332	1.51019	0.711253	1.69815	0.298073	1.75079	0.362966	0.982637	0.162143	0.950753
		0.9		48.1631	0.479833	20.8644	1.34206	0	5.23573	0.151169	7.19919	0	0	12.7182	2.00769	0.170595	0.0165155	1.65155	7.15954	0	50.4015	46.1441	0.28431	0.934623	0.764915	4.09407	0.879158	2.3397	51.0279	398.934	0.0657706	0.268091	0.0849179	138.999	9.66303	35.4117	2.74906	6.80044	1.0158	4.84351	1.56395	0.720087	1.77389	0.311803	1.83393	0.380765	1.03241	0.170593	1.00155
		0.95		47.8985	0.506491	20.3526	1.41662	0	5.52661	0.159567	7.59915	0	0	12.7323	1.87143	0.176086	0.0174331	1.74331	7.55729	0	46.2572	48.6187	0.298451	0.984672	0.805629	4.32152	0.872165	2.45339	53.7334	387.224	0.0694245	0.279923	0.0876122	146.721	10.1424	37.302	2.76547	6.91807	1.03924	4.9837	1.61772	0.728921	1.84962	0.325532	1.91708	0.398565	1.08219	0.179042	1.05235
		1		47.6338	0.533148	19.8408	1.49118	0	5.81748	0.167965	7.9991	0	0	12.7464	1.73517	0.181578	0.0183506	1.83506	7.95505	0	42.1128	51.0933	0.312591	1.03472	0.846343	4.54897	0.865172	2.56709	56.4389	375.514	0.0730784	0.291756	0.0903065	154.443	10.6217	39.1924	2.78187	7.0357	1.06268	5.12389	1.67148	0.737755	1.92536	0.339262	2.00022	0.416364	1.13196	0.187491	1.10315
[truncated: 1 more columns]

## Sheet: Data and additional figures
Supplementary Table 2: Whole Rock Major and Trace Element Geochemistry
Lab#	S122740	S122733	S122734	S122735	S122736	S122737	S122738	S122739	S122731	S122732
Sample#	AT40	AT11	AT15	AT18	AT20	AT27	AT29	AT37	AT4	AT9		A42	A105	A124	A96	A128	AT10.4	A14	A103	A115	A116
Type	OL Gabbronorite	OL gabbro	Gabbronorite	OL gabbro	OL gabbro	HB diorite	Anorth. diorite	HB diorite	HB diorite	HB diorite		Gabbro	Gabbro	Gabbro	Gabbro	Gabbro	Gabbro	Diorite	Diorite	Diorite	Diorite
wt.%
SiO2	47.8	46.8	47.8	47.5	46.5	47.5	47.2	48.7	54.3	53.3		53.11	49.87	54.13	49.67	45.24	45.68	57.77	53.1	54	55.8
TiO2	0.34	0.33	0.25	0.29	0.22	0.38	0.36	0.71	1.43	2.21		0.74	0.65	1.23	1	0.45	0.48	0.92	0.98	0.71	0.63
Al2O3	16.25	15.65	19.4	17.65	20.2	22.4	26	18.15	18.65	17.05		15.81	16.19	16.79	13.79	13.96	16.72	16.69	18.33	15.79	16.37
Fe2O3T	6.27	6.83	4.82	6.25	6.2	3.72	2.68	6.48	8.37	10.6		7.83	8.53	7.73	9	6.47	7.05	6.71	7.39	7.43	6.24
MnO	0.11	0.11	0.08	0.11	0.1	0.06	0.04	0.11	0.14	0.16		0.14	0.14	0.11	0.16	0.12	0.13	0.11	0.13	0.13	0.11
CaO	15.3	13.45	16.2	15.3	13.85	13.75	13.3	12.8	8.07	7.94		6.99	10.26	5.16	8.57	15.69	15.09	6.59	8.66	7.18	6.4
MgO	11.75	14.7	10.3	11.15	10.8	5.84	3.49	8.01	3.42	4.14		6.94	8.19	3.86	9.43	11.26	10.45	3.16	5.58	6.34	5.25
Na2O	1.15	1.06	1.14	1.1	1.22	2.17	3.46	2.03	3.76	3.71		2.62	2.43	3.1	2.93	1.46	1.37	4.39	3.1	2.84	3.53
K2O	0.1	0.1	0.05	0.08	0.12	0.21	0.31	0.25	0.62	0.58		0.74	0.36	2.05	0.76	0.2	0.14	0.93	0.37	0.67	0.83
Cr2O3	0.08	0.1	0.1	0.04	0.01	0.07	0.04	0.08	0.01	0.01		0	0.05	0.01	0.09	0.17	0.05	0.01	0	0	0
P2O5	0.01	0.01	<0.01	0.01	<0.01	0.03	0.04	0.04	0.15	0.12		0.13	0.11	0.38	0.35	0.06	0.06	0.26	0.18	0.12	0.11
LOI	1.03	1.98	1.16	1.15	1.54	3.27	3.74	2.22	2.68	1.6		3.99	3.23	5.45	4.26	4.91	2.28	2.45	2.28	3.66	3.78
Total	100.19	101.12	101.3	100.63	100.76	99.4	100.66	99.58	101.6	101.42		99.04	100.01	100	100.01	99.99	99.5	99.99	100.1	98.87	99.05
renorm anhydrous
SiO2	48.2049	47.206	47.7332	47.7483	46.8656	49.4123	48.7	50.0205	54.8928	53.3961		55.8759	51.5292	57.2501	51.8747	47.581	46.9862	59.227	54.2834	56.7167	58.5704
TiO2	0.34288	0.332863	0.24965	0.291516	0.221729	0.395298	0.37144	0.729252	1.44561	2.21399		0.778538	0.671626	1.3009	1.04439	0.473286	0.493726	0.943203	1.00184	0.74572	0.661278
Al2O3	16.3877	15.7858	19.3729	17.7423	20.3588	23.3018	26.8262	18.6422	18.8536	17.0807		16.6334	16.7287	17.7578	14.4021	14.6824	17.1981	17.1109	18.7385	16.5844	17.1827
Fe2O3T	6.32311	6.88925	4.81326	6.28267	6.24874	3.86976	2.76517	6.65571	8.46138	10.6191		8.23777	8.8138	8.17557	9.39948	6.8048	7.25159	6.87923	7.55469	7.8038	6.54981
MnO	0.110932	0.110954	0.0798882	0.110575	0.100786	0.0624155	0.0412712	0.112983	0.141529	0.160289		0.147291	0.144658	0.116341	0.167102	0.12621	0.133717	0.112774	0.132897	0.13654	0.115461
CaO	15.4296	13.5667	16.1774	15.38	13.9589	14.3035	13.7227	13.1471	8.15811	7.95432		7.35402	10.6014	5.45743	8.95039	16.5019	15.5215	6.7562	8.853	7.54122	6.71775
MgO	11.8495	14.8275	10.2856	11.2083	10.8849	6.07511	3.60091	8.2272	3.45734	4.14747		7.30142	8.46249	4.0825	9.84856	11.8427	10.7488	3.2397	5.70435	6.65896	5.51065
Na2O	1.15974	1.0692	1.13841	1.10575	1.22959	2.25736	3.56995	2.08505	3.80105	3.71669		2.75644	2.51085	3.27869	3.06005	1.53555	1.40918	4.50072	3.16909	2.98288	3.70526
K2O	0.100847	0.100867	0.0499301	0.0804182	0.120943	0.218454	0.319851	0.256779	0.626769	0.581046		0.778538	0.371978	2.16816	0.793734	0.210349	0.144003	0.953455	0.378246	0.703708	0.871208
Cr2O3	0.0806777	0.100867	0.0998602	0.0402091	0.0100786	0.0728181	0.0412712	0.0821693	0.0101092	0.010018		0	0.0516636	0.0105764	0.0939948	0.178797	0.0514297	0.0102522	0	0	0
P2O5	0.0100847	0.0100867	0	0.0100523	0	0.0312077	0.0412712	0.0410846	0.151638	0.120216		0.13677	0.11366	0.401904	0.365535	0.0631048	0.0617157	0.266557	0.184011	0.126037	0.115461
Total	100	100	100	100	100	100	100	100	100	100		100	100	100	100	100	100	100	100	100	100
Mg#	0.787765	0.809991	0.808888	0.77942	0.77529	0.756657	0.720615	0.710003	0.447301	0.436168		0.637093	0.655376	0.497247	0.674828	0.77513	0.745927	0.482608	0.599286	0.628266	0.624965
CT	0.06	0.05	0.03	0.06	0.06	0.2	0.28	0.12	0.2	0.04
ST	0.2	0.17	0.16	0.25	0.02	<0.01	<0.01	<0.01	0.01	<0.01
ppm
Ag	0.014	0.028	0.01	0.014	0.009	0.005	0.018	0.013	0.031	0.029	Ag	0.9	0.8	1.4	1.1	1.4	0.6	0.3	0.7	0.3	0.8
As	0.44	0.32	0.19	0.97	0.4	4.11	0.85	5.45	2.05	1.1	As	16	3	1	7	1	9	33	8	3	26
											Au	35.9	156.2	22.2	27.2	22.2	69.6	8.4	75.1	16.9	49.5
Ba	29.1	24.5	29.5	42.7	36.2	54.7	88.8	70.3	155.5	169	Ba	167	113	43	131	43	26	41.5	208	126	160
Be	0.15	0.12	0.11	0.11	0.12	0.21	0.29	0.31	0.69	0.59	Be	1.2	1.2	1.8	1.5	1.8	0.9	0.5	1.4	0.7	1.4
Bi	0.009	0.016	0.008	0.011	0.012	0.011	0.011	0.015	0.01	0.008	C	349.9	1647.1	6602	2461.8	6602	3620	1096.6	2543.7	100.7	323.2
Cd	0.064	0.064	0.055	0.086	0.056	0.045	0.034	0.066	0.088	0.102	Cd	0.4	0.3	0.5	0.7	0.5	0.3	4	0.2	0.2	0.6
Co	50.1	58.2	41.2	53.6	42.9	24.5	14.7	35.2	25	34.1	Co	31	50	28	44	28	36	45.2	42	24	31
Cr	550	790	780	270	100	540	290	630	50	80	Cr	0	329.8	95.8	604.1	95.8	1132.4	93.7	0	0	0
Cs	0.03	0.17	0.12	0.08	0.24	0.17	0.1	0.21	0.53	1.22	Cs		0.3	0.4	0.3	0.4	0.4	0	0.9	0.1	0.6
Cu	55.1	73.2	35.6	53.2	6	10.15	13.2	30.7	18	8.24	Cu	15.1	21.8	72.1	22.3	72.1	28.8	12.7	18.5	15.8	22.6
Ga	11.2	10.8	13.1	12.3	14.5	15.7	16.4	14.2	16.6	18.5	Ga	0.7	30.9	62.4	32.2	62.4	15.4	10	40.8	15.9	33.4
Ge	0.08	0.08	0.07	0.07	0.08	0.1	0.09	0.12	0.11	0.11
Hf	0.6	0.6	0.4	0.5	0.3	0.9	0.8	1.3	2	2.5	Hf	1.6	0.8	5.9	3.1	5.9	0.9	0.9	1.2	3.1	2.6
In	0.024	0.027	0.021	0.021	0.018	0.024	0.016	0.033	0.061	0.06	In	0.1	0.1	0.1	0.1	0.1	0	0	0.1	0	0.1
											Ir	0	0.2	0	0	0	0	0	0.1	0	0
Li	2.1	2.1	1.8	1.8	2	3.9	6.1	4.8	9.8	5	Li	10	8.6	15.3	12.6	15.3	4.8	4.8	12.2	3	9.4
Mn	796	799	616	787	732	481	308	804	1020	1205
Mo	0.24	0.2	0.21	0.22	0.2	0.25	0.27	0.6	0.43	0.69
Nb	0.463	0.464	0.288	0.376	0.339	0.684	0.774	1.305	2.9	2.23
Ni	59.1	154.5	84.5	44.9	11.4	37.4	21.5	61.1	7.95	16.2	Ni	42	237.4	240	352.5	240	224.1	34.5	209.3	23	31
Pb	0.43	0.5	0.34	1.31	5.35	1.04	0.78	0.95	2.24	1.47	Pb	3.6	8.1	25.4	16.3	25.4	14.9	21	15.8	0.2	3.9
											Pd	1	0.7	5.4	2.7	5.4	0.8	1.1	0.9	1.2	0.8
Rb	1.2	1.4	0.6	1.1	2	3.6	5.5	4	11.2	11.3	Rb	29.5	15	39.8	19	39.8	10.7	1.8	36.5	11	60
											Rh	0.1	0.1	0.1	0.1	0.1	0.1	0.1	0.1	0.1	0.1
											Ru	0.1	0.2	0.1	0.1	0.1	0.2	0	0.1	0.1	0.1
											S	250	132.1	99.4	208.2	99.4	104.5	1398.3	235.8	244.3	656.9
Sb	0.05	0.04	0.04	0.03	0.04	0.26	0.44	0.22	0.41	0.12	Sb	0.8	4.1	4.6	8.8	4.6	7.9	0.2	5.5	0.5	0.7
Sc	40.1	32.5	33.6	35.9	21.8	20.9	12.25	33.3	23.9	28.6	Sc	245.6	234.4	216.5	220	216.5	275.7	123.7	221.5	217.7	213.2
Se	0.2	<0.2	<0.2	0.3	<0.2	<0.2	<0.2	<0.2	<0.2	0.2
Sn	0.21	0.22	0.17	0.17	0.17	0.33	0.32	0.61	0.72	1	Sn	1.7	1.3	2.9	1.8	2.9	1.6	0.8	2	1.7	1.6
Sr	299	294	351	348	433	436	488	374	303	383	Sr	436.2	362.9	366	347.1	366	336.5	229.7	454.2	334	317
Ta	0.03	0.04	0.02	0.02	0.05	0.04	0.05	0.09	0.18	0.15
Te	<0.04	<0.04	<0.04	<0.04	<0.04	<0.04	<0.04	<0.04	<0.04	<0.04
Th	0.14	0.16	0.08	0.16	0.12	0.28	0.27	0.42	0.91	0.89	Th	2.1	3.4	5.6	4	5.6	0.5	0.3	2.5	1.9	2.1
Tl	0.008	0.011	0.011	0.018	0.013	0.023	0.029	0.019	0.048	0.056	Tl	0.1	0	0.1	0.1	0.1	0	0	0.1	0	0.1
U	0.05	0.05	<0.05	0.06	0.06	0.09	0.09	0.14	0.34	0.34	U	0.5	0.2	1.2	0.7	1.2	0.2	0.3	0.5	0.1	0.4
V	146	123	119	133	99	110	73	188	182	386	V	369.7	510.4	486.7	577.6	486.7	443.8	344.4	417.1	442.1	389.4
Y	7.3	6.9	5.6	6.6	4.9	7.9	6.5	12.2	20.5	19.2	Y	29.1	22	58	31.6	58	17	9.6	36	37.5	29.4
Zn	37.9	37.1	25.7	33.3	37.6	25.3	17.2	42.4	75	86.3	Zn	101.9	109.7	141.1	189.4	141.1	84.8	20.8	134.6	51.1	105.6
Zr	20	22	14	17	13	34	26	47	68	89	Zr	80	47	202	115	202	42	73	107	105	86
La	1.7	1.6	1.2	1.8	1.6	2.3	2.4	3.5	6.4	5.7	La	11.3	5.5	28.4	25.7	28.4	3.4	2.2	15	14.3	11.7
Ce	4.2	4.1	3.2	4.7	3.7	5.6	6	8.7	14.7	13.4	Ce	25.6	12.9	67.2	58.7	67.2	8.6	5.7	34	32.8	26.5
Pr	0.63	0.63	0.46	0.63	0.49	0.81	0.79	1.3	2.1	1.97	Pr	3.3	1.8	8.5	7.2	8.5	1.3	0.8	4.4	4.4	3.5
Nd	3.2	3.1	2.4	3.2	2.5	4	3.9	6	9.8	9.6	Nd	15.4	8.9	37.4	30.8	37.4	6.5	3.9	20.7	20.4	15.7
Sm	1.05	1.05	0.86	1.06	0.78	1.18	0.99	1.82	3.06	2.9	Sm	6.1	2.6	9.4	6.5	9.4	2	1.3	5.5	5.2	4.1
Eu	0.43	0.47	0.43	0.43	0.39	0.55	0.53	0.67	1.18	1.17	Eu	3.1	1.4	2.4	2	2.4	0.8	0.6	2.1	1.8	1.5
Gd	1.23	1.24	1.02	1.19	0.79	1.37	1.09	2.04	3.34	3.25	Gd	4.8	3.3	10.1	6.7	10.1	2.7	1.7	6.2	6.1	4.7
Tb	0.21	0.22	0.16	0.19	0.13	0.23	0.17	0.35	0.55	0.55	Tb	0.7	0.5	1.5	0.9	1.5	0.4	0.3	0.9	0.9	0.7
Dy	1.36	1.3	1.1	1.34	0.87	1.51	1.1	2.2	3.65	3.58	Dy	4.7	3.4	9.1	5.4	9.1	2.8	1.8	5.7	5.9	4.7
Ho	0.29	0.27	0.23	0.25	0.19	0.32	0.23	0.47	0.74	0.75	Ho	1	0.7	1.8	1.1	1.8	0.6	0.4	1.2	1.2	0.9
Er	0.89	0.73	0.61	0.73	0.59	0.82	0.67	1.29	2.14	2.14	Er	2.9	2.1	5.4	3.1	5.4	1.6	1	3.5	3.6	2.8
Tm	0.12	0.12	0.08	0.11	0.07	0.12	0.1	0.17	0.32	0.31	Tm	0.4	0.3	0.7	0.4	0.7	0.2	0.1	0.5	0.5	0.4
Yb	0.72	0.7	0.49	0.65	0.43	0.74	0.61	1.17	2.09	2.07	Yb	2.7	2	4.6	2.7	4.6	1.4	0.9	3	3.1	2.6
Lu	0.09	0.09	0.06	0.09	0.06	0.1	0.08	0.18	0.3	0.33	Lu	0.5	0.3	0.7	0.4	0.7	0.2	0.1	0.4	0.5	0.4
	AT40 is just olivine removal from AT11/13 in all respects (or AT11/13 is olivine addition to AT40)
